# Supplementary material for: Characterization of introgression from the teosinte Zea mays ssp. mexicana to Mexican highland maize
Source: PeerJ. 2019 May 3;7:e6815. doi: 10.7717/peerj.6815 (PMC6501764; doi:10.7717/peerj.6815)
Supplement: Supplemental Information 4 — Raw output from fd analysis. Mexican highland maize in test position. [file peerj-07-6815-s004.csv]

window.1..1.	inicio...2.	fin...2.	fin...2....inicio...2.	medio	FdNum	FdDenom	DNum	DDenom	FhomNum	FhomDenom	D	FdRes
1	2446	10871	8425	6658.5	0.520833333333333	1.75694444444445	0.520833333333333	8.7361111111111	0.520833333333333	-0.729166666666665	0.0596184419713831	0.296442687747035
1	11773	12916	1143	12344.5	0.75	4.13194444444444	0.75	9.49305555555556	0.75	2.70833333333333	0.0790051207022678	0.181512605042017
1	35129	44485	9356	39807	0.479166666666667	3.17361111111111	0.479166666666667	8.48611111111111	0.479166666666667	2	0.0564648117839607	0.150984682713348
1	44491	49419	4928	46955	1.125	3.34027777777778	1.125	8.84722222222222	1.125	2	0.127158555729984	0.336798336798337
1	71581	73257	1676	72419	2.41666666666667	6.82638888888889	2.41666666666667	12.0833333333333	2.41666666666667	5.625	0.2	0.354018311291964
1	218260	219545	1285	218902.5	0.166666666666667	0.861111111111111	0.166666666666667	12.2222222222222	0.166666666666667	0.75	0.0136363636363637	0.193548387096775
1	223365	224393	1028	223879	1.5625	6.59722222222222	1.5625	10.1388888888889	1.5625	4.16666666666667	0.154109589041096	0.236842105263158
1	224394	228720	4326	226557	0.229166666666666	4	0.229166666666666	9.06944444444444	0.229166666666666	0.770833333333334	0.0252679938744257	0.0572916666666665
1	252994	262065	9071	257529.5	1	5.25694444444445	1	8.28472222222222	1	3.27083333333333	0.12070410729254	0.190224570673712
1	262079	274838	12759	268458.5	1.29166666666667	3.38194444444445	1.29166666666667	9.44097222222222	1.29166666666667	2.375	0.136815005516734	0.381930184804928
1	326180	390692	64512	358436	1.02083333333333	8.45833333333333	1.02083333333333	11.5763888888889	1.02083333333333	8	0.0881823635272946	0.120689655172414
1	1779253	1906550	127297	1842901.5	0.645833333333333	11.7291666666667	0.645833333333333	15.2777777777778	0.645833333333333	11.4375	0.0422727272727272	0.0550621669626998
1	1906592	1928369	21777	1917480.5	5.77083333333333	21.7013888888889	5.77083333333333	21.1840277777778	5.77083333333333	21.6041666666667	0.272414358301918	0.26592
1	1928552	1962126	33574	1945339	2.08333333333333	13.8888888888889	2.08333333333333	16.6805555555556	2.08333333333333	13.4583333333333	0.124895920066611	0.15
1	1962600	2028267	65667	1995433.5	0.416666666666664	14.8402777777778	0.416666666666664	16.8194444444444	0.416666666666664	13.8125	0.0247729149463252	0.0280767430978005
1	2028370	2090150	61780	2059260	3.5625	11.0069444444444	3.5625	14.5902777777778	3.5625	9.41666666666667	0.244169443122323	0.323659305993691
1	2220130	2232571	12441	2226350.5	1.54166666666666	10.4375	1.54166666666666	11.2326388888889	1.54166666666666	9.52083333333333	0.137248840803709	0.147704590818363
1	2232596	2233548	952	2233072	0.166666666666666	6.02083333333333	0.166666666666666	8.76388888888889	0.166666666666666	4.9375	0.0190174326465926	0.0276816608996538
1	2233568	2235570	2002	2234569	1.5	5.40972222222222	1.5	5.5625	1.5	4.20833333333333	0.269662921348314	0.277278562259307
1	2235889	2382097	146208	2308993	3.72916666666667	19.3611111111111	3.72916666666667	16.0972222222222	3.72916666666667	17.7083333333333	0.231665228645384	0.192611190817791
1	2382111	2403278	21167	2392694.5	6.04166666666667	25.2777777777778	6.04166666666667	11.125	6.04166666666667	23.9583333333333	0.543071161048689	0.239010989010989
1	2707828	2734260	26432	2721044	3.625	18.7083333333333	3.625	15.875	3.625	18.625	0.228346456692913	0.193763919821826
1	2742721	2792196	49475	2767458.5	0.416666666666667	8.86111111111111	0.416666666666667	10.0972222222222	0.416666666666667	7.14583333333334	0.0412654745529574	0.0470219435736677
1	2797867	2865877	68010	2831872	4.33333333333333	20.0555555555556	4.33333333333333	18.6111111111111	4.33333333333333	18.7916666666667	0.232835820895522	0.21606648199446
1	2866375	2931165	64790	2898770	1.875	12.6666666666667	1.875	13.2777777777778	1.875	11.3333333333333	0.141213389121339	0.148026315789473
1	2998735	3023471	24736	3011103	3.62499999999999	17.0694444444444	3.62499999999999	18.2222222222222	3.62499999999999	15.2916666666667	0.198932926829268	0.212367778681855
1	3023526	3033482	9956	3028504	3.45833333333334	12.2083333333333	3.45833333333334	11.2916666666667	3.45833333333334	11.5208333333333	0.306273062730628	0.283276450511946
1	3033718	3060966	27248	3047342	4.60416666666667	13.4305555555556	4.60416666666667	12.3958333333333	4.60416666666667	12.625	0.371428571428571	0.342812823164426
1	3060984	3128149	67165	3094566.5	6.08333333333333	18.8333333333333	6.08333333333333	13.4027777777778	6.08333333333333	17.8333333333333	0.453886010362694	0.323008849557522
1	3128165	3174378	46213	3151271.5	1.0625	9.86805555555556	1.0625	8.97916666666667	1.0625	8.39583333333333	0.118329466357309	0.107670654468684
1	3174622	3180977	6355	3177799.5	5.75	14.0833333333333	5.75	10.1944444444444	5.75	12.25	0.564032697547684	0.408284023668639
1	3180991	3190903	9912	3185947	1.54166666666667	9.60416666666667	1.54166666666667	7.38888888888888	1.54166666666667	8.14583333333333	0.208646616541353	0.160520607375271
1	3641636	3702677	61041	3672156.5	1.58333333333334	12.9097222222222	1.58333333333334	11.9861111111111	1.58333333333334	12.1041666666667	0.132097334878332	0.122646584185046
1	3703090	3726432	23342	3714761	6.74999999999999	24.625	6.74999999999999	16.5	6.74999999999999	24.4583333333333	0.409090909090909	0.274111675126903
1	3726761	3876934	150173	3801847.5	1.83333333333333	11.1875	1.83333333333333	10.0694444444444	1.83333333333333	8.64583333333334	0.182068965517241	0.163873370577281
1	4015726	4044061	28335	4029893.5	1.52083333333333	9.93055555555556	1.52083333333333	8.15277777777778	1.52083333333333	9.0625	0.186541737649063	0.153146853146853
1	4059472	4061672	2200	4060572	0.625	5.16666666666667	0.625	11.0138888888889	0.625	4.35416666666667	0.0567465321563682	0.120967741935484
1	4061687	4133921	72234	4097804	4.04166666666667	16.2777777777778	4.04166666666667	11.5555555555556	4.04166666666667	15.9791666666667	0.349759615384615	0.248293515358362
1	4133992	4152236	18244	4143114	5.02083333333333	19.5208333333333	5.02083333333333	12.1736111111111	5.02083333333333	19.3125	0.412435824301198	0.257203842049093
1	4152240	4168518	16278	4160379	4.33333333333334	19.3680555555556	4.33333333333334	12.4444444444444	4.33333333333334	19.1875	0.348214285714286	0.22373610613123
1	4169802	4184659	14857	4177230.5	3.47916666666667	15.9097222222222	3.47916666666667	11.1388888888889	3.47916666666667	14.8333333333333	0.312344139650873	0.218681798341336
1	4308633	4508020	199387	4408326.5	0.166666666666666	11.4375	0.166666666666666	11.5277777777778	0.166666666666666	10.8333333333333	0.0144578313253012	0.0145719489981785
1	4508172	4603439	95267	4555805.5	2.08333333333333	10.1527777777778	2.08333333333333	9.47222222222222	2.08333333333333	6.77083333333333	0.219941348973607	0.205198358413133
1	4755522	4853908	98386	4804715	0.145833333333333	3.81944444444445	0.145833333333333	7.21527777777778	0.145833333333333	0.708333333333336	0.0202117420596727	0.038181818181818
1	4853918	4976735	122817	4915326.5	1.5	5.15277777777778	1.5	8.14930555555556	1.5	3.625	0.184064763527908	0.291105121293801
1	4976743	4994324	17581	4985533.5	1.02083333333333	8.76388888888889	1.02083333333333	11.2083333333333	1.02083333333333	4.95833333333333	0.0910780669144982	0.11648177496038
1	4994368	5084844	90476	5039606	4.33333333333334	14.9444444444444	4.33333333333334	12.4236111111111	4.33333333333334	13.6666666666667	0.348798211291224	0.289962825278811
1	5086853	5321063	234210	5203958	4.375	16.2916666666667	4.375	17.8333333333333	4.375	15.25	0.245327102803738	0.268542199488491
1	5321094	5343876	22782	5332485	4.625	15.1458333333333	4.625	16.2638888888889	4.625	14.9583333333333	0.284372331340734	0.305364511691884
1	5431188	5535515	104327	5483351.5	2.6875	14.0416666666667	2.6875	17.2291666666667	2.6875	12.9375	0.155985489721886	0.191394658753709
1	5535578	5679615	144037	5607596.5	0.187500000000004	15.8125	0.187500000000004	15.0416666666667	0.187500000000004	13	0.0124653739612191	0.0118577075098817
1	5733385	5800088	66703	5766736.5	1.39583333333333	14.9791666666667	1.39583333333333	10.5277777777778	1.39583333333333	10.5	0.132585751978892	0.0931849791376913
1	5800128	5814778	14650	5807453	0.708333333333334	8.47916666666667	0.708333333333334	12.4722222222222	0.708333333333334	6.52083333333333	0.056792873051225	0.0835380835380837
1	5814782	5815718	936	5815250	0.875000000000002	2.54166666666667	0.875000000000002	8.84722222222222	0.875000000000002	1.875	0.0989010989010991	0.344262295081968
1	5824576	5981510	156934	5903043	1.08333333333333	7.78472222222222	1.08333333333333	9.16666666666667	1.08333333333333	7.0625	0.118181818181818	0.139161462979483
1	5981774	5992147	10373	5986960.5	2.91666666666667	7.4375	2.91666666666667	12.1388888888889	2.91666666666667	6.5625	0.240274599542334	0.392156862745098
1	5992152	6005712	13560	5998932	2.41666666666667	7.84722222222222	2.41666666666667	9.27777777777778	2.41666666666667	7.27083333333333	0.260479041916168	0.307964601769912
1	6005739	6012357	6618	6009048	2.68750000000001	10.0833333333333	2.68750000000001	10.4791666666667	2.68750000000001	9.47916666666667	0.256461232604374	0.266528925619835
1	6012427	6074375	61948	6043401	3.1875	11.3333333333333	3.1875	10.2986111111111	3.1875	10.7291666666667	0.309507754551585	0.28125
1	6074393	6151496	77103	6112944.5	1.58333333333333	10.5902777777778	1.58333333333333	11.4305555555556	1.58333333333333	10.2708333333333	0.138517618469016	0.149508196721312
1	6213362	6225541	12179	6219451.5	6.80011602582908e-16	11.1041666666667	6.80011602582908e-16	11.2083333333333	6.80011602582908e-16	10.6666666666667	6.06701801560959e-17	6.12393188067159e-17
1	6225551	6239792	14241	6232671.5	1.27083333333333	11.6944444444444	1.27083333333333	12.7777777777778	1.27083333333333	10.8541666666667	0.0994565217391305	0.108669833729216
1	6511895	6545172	33277	6528533.5	0.187500000000001	6.06944444444444	0.187500000000001	10.75	0.187500000000001	4.875	0.0174418604651164	0.030892448512586
1	6844597	6918609	74012	6881603	7.3125	16.7916666666667	7.3125	17.6180555555556	7.3125	16.2916666666667	0.415057154119038	0.435483870967742
1	6918783	7036282	117499	6977532.5	1.95833333333333	16.9583333333333	1.95833333333333	16.4861111111111	1.95833333333333	16.7083333333333	0.118786857624263	0.115479115479115
1	7081815	7184460	102645	7133137.5	0.458333333333331	10.1805555555556	0.458333333333331	11.4861111111111	0.458333333333331	9.1875	0.0399032648125754	0.0450204638472031
1	7293056	7305385	12329	7299220.5	4.33333333333333	11.7569444444444	4.33333333333333	12.2222222222222	4.33333333333333	10.8333333333333	0.354545454545454	0.368576491435322
1	7305499	7333506	28007	7319502.5	4.74999999999999	12.1875	4.74999999999999	15.1527777777778	4.74999999999999	11.7916666666667	0.313473877176902	0.389743589743589
1	7333531	7405265	71734	7369398	2.45833333333333	20.6111111111111	2.45833333333333	13.0555555555556	2.45833333333333	20.4166666666667	0.188297872340425	0.119272237196765
1	7405320	7427601	22281	7416460.5	5.58333333333334	22.7222222222222	5.58333333333334	9.96875000000001	5.58333333333334	22.4166666666667	0.560083594566353	0.245721271393643
1	7703777	7862317	158540	7783047	0.75	13.8333333333333	0.75	13.5833333333333	0.75	13.5625	0.0552147239263804	0.0542168674698795
1	7862337	7940964	78627	7901650.5	4.1875	14.5694444444444	4.1875	9.13194444444445	4.1875	13.875	0.458555133079848	0.287416587225929
1	8016578	8099388	82810	8057983	1.41666666666666	9.13888888888889	1.41666666666666	11.5138888888889	1.41666666666666	7.5625	0.123039806996381	0.155015197568389
1	8281910	8345028	63118	8313469	1.3125	6.48611111111112	1.3125	9.82638888888888	1.3125	4.35416666666667	0.133568904593639	0.202355460385439
1	8345079	8445037	99958	8395058	0.5	9.95833333333334	0.5	10.9583333333333	0.5	9.125	0.0456273764258556	0.0502092050209205
1	8619408	8652030	32622	8635719	0.520833333333331	10.9305555555556	0.520833333333331	12.6458333333333	0.520833333333331	8.3125	0.0411861614497527	0.047649301143583
1	8652183	8879181	226998	8765682	8.58333333333333	24.4027777777778	8.58333333333333	17.0694444444444	8.58333333333333	23.6458333333333	0.502847843775427	0.351735913488902
1	9047465	9185513	138048	9116489	3.25	15.8333333333333	3.25	15.2361111111111	3.25	15.3958333333333	0.21330902461258	0.205263157894737
1	9185675	9209835	24160	9197755	8.375	16.9652777777778	8.375	15.3333333333333	8.375	16.7708333333333	0.546195652173913	0.493655341792878
1	9299073	9358618	59545	9328845.5	3.20833333333334	9.04166666666667	3.20833333333334	14.8819444444444	3.20833333333334	8.12500000000001	0.215585627624825	0.35483870967742
1	9358781	9421025	62244	9389903	0.375000000000003	11.0486111111111	0.375000000000003	11.8472222222222	0.375000000000003	10.3333333333333	0.0316529894490038	0.0339409176618482
1	9569654	9577713	8059	9573683.5	1.58333333333333	11.6458333333333	1.58333333333333	9.08333333333334	1.58333333333333	9.89583333333334	0.174311926605505	0.135957066189624
1	9577746	9799321	221575	9688533.5	4.29166666666667	14.0972222222222	4.29166666666667	10.5972222222222	4.29166666666667	9.95833333333334	0.404980340760157	0.304433497536946
1	10189163	10190056	893	10189609.5	0.208333333333335	3.88194444444445	0.208333333333335	8.35416666666667	0.208333333333335	3.72916666666667	0.0249376558603493	0.0536672629695889
1	10543749	10647304	103555	10595526.5	4.375	12.875	4.375	13.8611111111111	4.375	9.77083333333334	0.31563126252505	0.339805825242719
1	10647322	10682645	35323	10664983.5	5.33333333333333	16.7430555555556	5.33333333333333	13	5.33333333333333	14.8541666666667	0.41025641025641	0.318540024885939
1	10682886	10731311	48425	10707098.5	7.08333333333333	13.0069444444444	7.08333333333333	12.4444444444444	7.08333333333333	13.3541666666667	0.569196428571429	0.544580886278697
1	10731328	10825022	93694	10778175	3.54166666666667	20.2638888888889	3.54166666666667	12.3541666666667	3.54166666666667	20.0833333333333	0.286677908937605	0.174777244688143
1	10825024	10904697	79673	10864860.5	0.624999999999999	15.4722222222222	0.624999999999999	15.0694444444444	0.624999999999999	15.3333333333333	0.0414746543778801	0.0403949730700179
1	10931491	10990020	58529	10960755.5	0.875	16.5138888888889	0.875	10.5	0.875	16.0416666666667	0.0833333333333333	0.0529857022708158
1	11111744	11208652	96908	11160198	4.41666666666667	11.3055555555556	4.41666666666667	11.7291666666667	4.41666666666667	9.10416666666667	0.376554174067496	0.390663390663391
1	11208653	11242478	33825	11225565.5	2.91666666666667	12.5486111111111	2.91666666666667	11.8263888888889	2.91666666666667	12.3333333333333	0.246623605402231	0.232429441062535
1	11481103	11599440	118337	11540271.5	5.8125	21.125	5.8125	11.3680555555556	5.8125	20.8333333333333	0.511301160659743	0.275147928994083
1	11599461	11778305	178844	11688883	4.75	17.4444444444444	4.75	10.9722222222222	4.75	14.5625	0.432911392405063	0.272292993630573
1	11951117	11988879	37762	11969998	2.95833333333333	13.0833333333333	2.95833333333333	13.0416666666667	2.95833333333333	11.8958333333333	0.226837060702875	0.226114649681529
1	12144904	12176521	31617	12160712.5	1.79166666666666	11.9236111111111	1.79166666666666	13.6944444444444	1.79166666666666	11.5625	0.130831643002028	0.150262085032032
1	12184642	12252018	67376	12218330	1.5	14.4166666666667	1.5	11.2708333333333	1.5	13.75	0.133086876155268	0.104046242774566
1	12310232	12317849	7617	12314040.5	0.5	10.2916666666667	0.5	14.2777777777778	0.5	10.2083333333333	0.0350194552529183	0.048582995951417
1	12317903	12329748	11845	12323825.5	16.6458333333333	21.8263888888889	16.6458333333333	20.0625	16.6458333333333	20.2708333333333	0.829698857736241	0.762647152402164
1	12329851	12346664	16813	12338257.5	4.79166666666667	15.1666666666667	4.79166666666667	13.3472222222222	4.79166666666667	14.0416666666667	0.359001040582727	0.315934065934066
1	12504634	12657282	152648	12580958	10.5833333333333	22.2083333333333	10.5833333333333	16.75	10.5833333333333	17.875	0.6318407960199	0.476547842401501
1	12657350	12664305	6955	12660827.5	1.58333333333334	10.4722222222222	1.58333333333334	11.8055555555556	1.58333333333334	9.83333333333333	0.134117647058824	0.151193633952255
1	12664316	12672242	7926	12668279	3.41666666666667	10.3055555555556	3.41666666666667	10.5277777777778	3.41666666666667	10.125	0.324538258575198	0.331536388140162
1	12672252	12796907	124655	12734579.5	1.54166666666667	14.1736111111111	1.54166666666667	13.7638888888889	1.54166666666667	12.8541666666667	0.112008072653885	0.108770210681039
1	12796969	12951373	154404	12874171	8.25	23.375	8.25	21.0972222222222	8.25	22.6875	0.391046741277156	0.352941176470588
1	12966815	12980349	13534	12973582	5.08333333333333	15.4027777777778	5.08333333333333	13.4722222222222	5.08333333333333	13.9375	0.377319587628866	0.330027051397656
1	13056552	13074595	18043	13065573.5	0.333333333333332	7.92361111111111	0.333333333333332	12.5347222222222	0.333333333333332	7.25	0.0265927977839334	0.0420683610867658
1	13074748	13145066	70318	13109907	0.291666666666666	8.43055555555556	0.291666666666666	12.5555555555556	0.291666666666666	7.08333333333333	0.0232300884955752	0.0345963756177923
1	13787030	13829842	42812	13808436	1.45833333333333	9.22916666666667	1.45833333333333	9.46527777777778	1.45833333333333	6.25	0.154071900220103	0.158013544018059
1	14096215	14246229	150014	14171222	3.29166666666666	12.2708333333333	3.29166666666666	12.5138888888889	3.29166666666666	10.2291666666667	0.263041065482797	0.268251273344652
1	14247287	14378872	131585	14313079.5	1.27083333333333	6.76388888888889	1.27083333333333	8.11805555555556	1.27083333333333	4.83333333333333	0.156544054747647	0.18788501026694
1	14378971	14405670	26699	14392320.5	1.4375	8.22222222222222	1.4375	9.04861111111111	1.4375	6.83333333333333	0.158864159631619	0.174831081081081
1	14405945	14485215	79270	14445580	3.16666666666667	18.1388888888889	3.16666666666667	13.125	3.16666666666667	17.1458333333333	0.241269841269841	0.174578866768759
1	14485673	14509515	23842	14497594	6.29166666666667	14.4236111111111	6.29166666666667	12.2361111111111	6.29166666666667	13.7083333333333	0.514188422247446	0.436206066441984
1	14509578	14557408	47830	14533493	1.60416666666667	8.72222222222222	1.60416666666667	13.0972222222222	1.60416666666667	8.125	0.122481442205726	0.183917197452229
1	14557415	14677157	119742	14617286	1.64583333333333	10.9861111111111	1.64583333333333	10.8958333333333	1.64583333333333	10.3125	0.151051625239006	0.149810366624526
1	14677508	14807016	129508	14742262	3.16666666666667	14.5416666666667	3.16666666666667	14.4305555555556	3.16666666666667	13.5416666666667	0.21944177093359	0.217765042979943
1	14807055	14851135	44080	14829095	1.47916666666667	19.0069444444444	1.47916666666667	17.2291666666667	1.47916666666667	17.9791666666667	0.085852478839178	0.0778224333211548
1	14851265	14859759	8494	14855512	4.08333333333333	12.1736111111111	4.08333333333333	12.9305555555556	4.08333333333333	9.60416666666666	0.31578947368421	0.335424985738733
1	14859801	14956838	97037	14908319.5	1.04166666666666	14.4166666666667	1.04166666666666	13.6805555555556	1.04166666666666	13.5625	0.0761421319796952	0.0722543352601154
1	14957658	15103832	146174	15030745	4.16666666666667	18.25	4.16666666666667	10.1736111111111	4.16666666666667	16.9791666666667	0.409556313993174	0.228310502283105
1	15103843	15135973	32130	15119908	2	9.125	2	9.91666666666667	2	8.64583333333334	0.201680672268907	0.219178082191781
1	15140874	15185476	44602	15163175	0.833333333333336	17.3055555555556	0.833333333333336	12.0833333333333	0.833333333333336	16.6666666666667	0.0689655172413795	0.0481540930979135
1	15185491	15341693	156202	15263592	3.77083333333334	14.5069444444444	3.77083333333334	9.48611111111111	3.77083333333334	13.9375	0.397510980966325	0.259932982288176
1	15341961	15474236	132275	15408098.5	28.5416666666667	33.8402777777778	28.5416666666667	32.6666666666667	28.5416666666667	32.3333333333333	0.873724489795918	0.843422942745742
1	15474252	15513520	39268	15493886	11.4166666666667	20.0555555555556	11.4166666666667	18.9166666666667	11.4166666666667	16.4166666666667	0.60352422907489	0.569252077562327
1	15513553	15589447	75894	15551500	9.72916666666666	15.7430555555556	9.72916666666666	17.3472222222222	9.72916666666666	11.2291666666667	0.560848678943155	0.617997353330392
1	15589460	15770103	180643	15679781.5	7.47916666666666	17.7361111111111	7.47916666666666	16.4166666666667	7.47916666666666	14.25	0.455583756345178	0.421691464369616
1	15784043	15992203	208160	15888123	1.375	14.5277777777778	1.375	16.2361111111111	1.375	11.3125	0.0846877673224979	0.0946462715105162
1	15992206	15993388	1182	15992797	2.16666666666667	4.80555555555556	2.16666666666667	8.54861111111111	2.16666666666667	3.52083333333334	0.253452477660439	0.450867052023121
1	15993390	16208814	215424	16101102	0.625	9.79861111111111	0.625	12.7777777777778	0.625	8.8125	0.0489130434782608	0.0637845499645641
1	16339638	16436299	96661	16387968.5	13.4583333333333	18.2083333333333	13.4583333333333	18.5138888888889	13.4583333333333	18.2083333333333	0.726931732933233	0.739130434782609
1	16436390	16512763	76373	16474576.5	1.02083333333333	13.2083333333333	1.02083333333333	14.7569444444444	1.02083333333333	10.25	0.0691764705882351	0.0772870662460565
1	16512802	16578359	65557	16545580.5	7.375	15.1458333333333	7.375	12.8125	7.375	11.5208333333333	0.575609756097561	0.486932599724897
1	16578367	16604120	25753	16591243.5	12.1666666666667	23.7013888888889	12.1666666666667	21.6805555555556	12.1666666666667	16.5625	0.561178731582319	0.51333138001758
1	16604300	16772907	168607	16688603.5	20.375	27.8819444444444	20.375	23.6805555555556	20.375	23.1041666666667	0.860410557184751	0.730759651307596
1	16772917	16832398	59481	16802657.5	10.3958333333333	21.3472222222222	10.3958333333333	15.5069444444444	10.3958333333333	19.4583333333333	0.670398566950291	0.486987638256344
1	16834154	17002440	168286	16918297	5.79166666666667	20.6041666666667	5.79166666666667	12.5277777777778	5.79166666666667	20.4583333333333	0.462305986696231	0.281092012133468
1	17669143	17678769	9626	17673956	0.833333333333337	11.6527777777778	0.833333333333337	14.7361111111111	0.833333333333337	10.25	0.0565504241281812	0.0715137067938025
1	17678936	17747872	68936	17713404	4	18.25	4	11.6388888888889	4	17.3333333333333	0.343675417661098	0.219178082191781
1	17747934	17844864	96930	17796399	4.37500000000001	22.1180555555556	4.37500000000001	12.9722222222222	4.37500000000001	21.6041666666667	0.337259100642399	0.197802197802198
1	17844920	17853210	8290	17849065	0.374999999999998	13.0277777777778	0.374999999999998	13.5	0.374999999999998	13	0.0277777777777776	0.0287846481876331
1	17853216	17960918	107702	17907067	1.75	14.0486111111111	1.75	15.1944444444444	1.75	13.0416666666667	0.115173674588665	0.124567474048443
1	17960972	18131916	170944	18046444	3.29166666666667	14.1180555555556	3.29166666666667	13.3611111111111	3.29166666666667	12.875	0.246361746361746	0.233152975897688
1	18132356	18177506	45150	18154931	9.66666666666666	25.3402777777778	9.66666666666666	12.4444444444444	9.66666666666666	24.1041666666667	0.776785714285714	0.381474376541518
1	18200692	18639223	438531	18419957.5	2	9.73611111111111	2	10.9166666666667	2	7.79166666666667	0.183206106870229	0.205420827389444
1	18639263	18955570	316307	18797416.5	6.54166666666667	21.4444444444444	6.54166666666667	16.4722222222222	6.54166666666667	21.1458333333333	0.397133220910624	0.305051813471503
1	18957473	19168117	210644	19062795	3.79166666666667	20.7222222222222	3.79166666666667	16.4861111111111	3.79166666666667	20.25	0.229991575400168	0.182975871313673
1	19589035	19591482	2447	19590258.5	1.9375	5.38194444444444	1.9375	8	1.9375	4.6875	0.2421875	0.36
1	19700820	19793143	92323	19746981.5	7.70833333333333	20.0069444444444	7.70833333333333	16.4722222222222	7.70833333333333	17.6875	0.467959527824621	0.385282887886151
1	19809677	19982381	172704	19896029	6.25	14.7569444444444	6.25	15.5416666666667	6.25	14.2083333333333	0.402144772117962	0.423529411764706
1	19984221	20087935	103714	20036078	9.66666666666666	19.5	9.66666666666666	12.8888888888889	9.66666666666666	18.75	0.75	0.495726495726496
1	20087948	20114394	26446	20101171	1.47916666666666	10.0833333333333	1.47916666666666	11.2569444444444	1.47916666666666	8.33333333333333	0.131400370141888	0.146694214876033
1	20216020	20637285	421265	20426652.5	2.39583333333333	11.1388888888889	2.39583333333333	11.1597222222222	2.39583333333333	10.4166666666667	0.214685749844431	0.215087281795511
1	20637667	20996318	358651	20816992.5	3.91666666666667	13.8819444444444	3.91666666666667	10.8194444444444	3.91666666666667	11.375	0.362002567394095	0.282141070535268
1	20996337	21096705	100368	21046521	0.270833333333336	4.88194444444445	0.270833333333336	11.6284722222222	0.270833333333336	3.47916666666667	0.0232905344879071	0.0554765291607403
1	21096717	21447756	351039	21272236.5	1.4375	9.26388888888889	1.4375	8.89583333333334	1.4375	6.27083333333333	0.161592505854801	0.155172413793103
1	21469616	21544828	75212	21507222	1.89583333333334	6.79166666666667	1.89583333333334	8.24652777777778	1.89583333333334	5.5625	0.229894736842105	0.279141104294479
1	21544878	21698694	153816	21621786	2.91666666666667	17.0902777777778	2.91666666666667	17.7430555555556	2.91666666666667	16.7083333333333	0.164383561643836	0.17066233238521
1	21699260	21709419	10159	21704339.5	1.66666666666666	10.1944444444444	1.66666666666666	10.8888888888889	1.66666666666666	9.75	0.153061224489795	0.163487738419618
1	22312771	22374706	61935	22343738.5	0.166666666666667	12.9583333333333	0.166666666666667	10.375	0.166666666666667	12.3125	0.0160642570281125	0.0128617363344052
1	22386473	22461556	75083	22424014.5	7.58333333333334	18.8472222222222	7.58333333333334	14.0694444444444	7.58333333333334	18.0833333333333	0.538993089832182	0.402358142962417
1	22513439	22588053	74614	22550746	8.29166666666667	17.1388888888889	8.29166666666667	16.7638888888889	8.29166666666667	16.3333333333333	0.494614747307374	0.483792544570502
1	22588072	22595293	7221	22591682.5	10.4583333333333	16.1527777777778	10.4583333333333	14.4444444444444	10.4583333333333	16.1041666666667	0.724038461538462	0.647463456577816
1	23662640	23669523	6883	23666081.5	3.83333333333333	14.7569444444444	3.83333333333333	10.1597222222222	3.83333333333333	13.2916666666667	0.377306903622693	0.259764705882353
1	23669525	23798216	128691	23733870.5	0.249999999999999	18.8194444444444	0.249999999999999	9.70833333333334	0.249999999999999	18.5833333333333	0.0257510729613732	0.0132841328413283
1	23798477	23938646	140169	23868561.5	0.916666666666667	13.2013888888889	0.916666666666667	11.0902777777778	0.916666666666667	12.6458333333333	0.0826549780839073	0.0694371383482378
1	24005331	24043184	37853	24024257.5	1.60416666666667	22.0625	1.60416666666667	8.60416666666667	1.60416666666667	20.9791666666667	0.186440677966102	0.0727101038715771
1	24463121	24606617	143496	24534869	7.27083333333333	21.1527777777778	7.27083333333333	21.1875	7.27083333333333	20.4791666666667	0.343166175024582	0.343729481286934
1	24626694	24735622	108928	24681158	1.22916666666667	9.36805555555556	1.22916666666667	12.8541666666667	1.22916666666667	8.60416666666667	0.0956239870340358	0.131208302446257
1	24735721	24911300	175579	24823510.5	8.33333333333334	26.6736111111111	8.33333333333334	14.4201388888889	8.33333333333334	26.4791666666667	0.577895497230917	0.312418640978912
1	24911529	24941670	30141	24926599.5	0.291666666666667	20.3472222222222	0.291666666666667	14.9444444444444	0.291666666666667	18.2291666666667	0.0195167286245353	0.0143344709897611
1	24941676	25150763	209087	25046219.5	2	17.7916666666667	2	15.2361111111111	2	16.875	0.13126709206928	0.112412177985948
1	25152143	25284272	132129	25218207.5	3.16666666666667	13.4583333333333	3.16666666666667	11.5694444444444	3.16666666666667	11.6875	0.273709483793518	0.235294117647059
1	25285296	25384592	99296	25334944	2.66666666666667	11.3055555555556	2.66666666666667	14	2.66666666666667	7.66666666666667	0.19047619047619	0.235872235872236
1	25384897	25398515	13618	25391706	0.479166666666665	6.70138888888889	0.479166666666665	9.15625	0.479166666666665	5.375	0.0523321956769055	0.071502590673575
1	25398525	25426877	28352	25412701	1.25	18.4236111111111	1.25	13.6388888888889	1.25	17.7916666666667	0.0916496945010181	0.067847719562759
1	25426966	25624530	197564	25525748	10.5416666666667	20.625	10.5416666666667	17.1527777777778	10.5416666666667	14.5	0.614574898785425	0.511111111111111
1	25640036	25734352	94316	25687194	2.9375	10.3194444444444	2.9375	10.2430555555556	2.9375	10.2708333333333	0.286779661016949	0.284656796769852
1	25734371	25766833	32462	25750602	5.875	14.25	5.875	13.7708333333333	5.875	8.62500000000001	0.426626323751891	0.412280701754386
1	25766936	25787702	20766	25777319	7.25	14.7569444444444	7.25	14.4027777777778	7.25	12.625	0.503375120540019	0.491294117647059
1	25787791	25824962	37171	25806376.5	8.4375	14.6527777777778	8.4375	13.5208333333333	8.4375	10.7708333333333	0.624036979969183	0.575829383886256
1	25825002	25854825	29823	25839913.5	9.60416666666666	18.75	9.60416666666666	18.2013888888889	9.60416666666666	14.9791666666667	0.527661198016024	0.512222222222222
1	25854852	25882348	27496	25868600	6.83333333333333	16.0347222222222	6.83333333333333	16.2222222222222	6.83333333333333	13.875	0.421232876712329	0.426158510177566
1	25882482	26040253	157771	25961367.5	5.89583333333334	13.7847222222222	5.89583333333334	10.375	5.89583333333334	12.3541666666667	0.568273092369478	0.427707808564232
1	26040383	26148233	107850	26094308	1.4375	8.40277777777778	1.4375	5.29861111111111	1.4375	7.29166666666667	0.27129750982962	0.171074380165289
1	26148290	26198945	50655	26173617.5	3.66666666666667	10.6597222222222	3.66666666666667	4.27777777777778	3.66666666666667	10.1041666666667	0.857142857142857	0.343973941368078
1	26199751	26258407	58656	26229079	5.54166666666667	29.1041666666667	5.54166666666667	8.81944444444445	5.54166666666667	29.1041666666667	0.628346456692914	0.190408017179671
1	26258482	26330253	71771	26294367.5	4.25000000000001	24.4027777777778	4.25000000000001	8.91666666666667	4.25000000000001	24.125	0.476635514018692	0.174160500853728
1	26332843	26430737	97894	26381790	12.75	21.7708333333333	12.75	18.9027777777778	12.75	20.8333333333333	0.674504041146216	0.585645933014354
1	26565915	26688969	123054	26627442	1.875	8.13888888888889	1.875	9.4375	1.875	6.54166666666667	0.198675496688742	0.23037542662116
1	26857705	27072147	214442	26964926	0.499999999999999	7.24305555555556	0.499999999999999	9.57638888888889	0.499999999999999	5.89583333333333	0.0522117476432196	0.0690316395014381
1	27072163	27096438	24275	27084300.5	2.75	7.1875	2.75	8.45833333333333	2.75	4.35416666666667	0.32512315270936	0.382608695652174
1	27120762	27176722	55960	27148742	1.8125	7.93055555555556	1.8125	9.52083333333333	1.8125	6.41666666666667	0.190371991247265	0.228546409807355
1	27176983	27181835	4852	27179409	7.08333333333333	20.0833333333333	7.08333333333333	21.3888888888889	7.08333333333333	17.0833333333333	0.331168831168831	0.352697095435685
1	27359687	27376961	17274	27368324	0.354166666666665	13.9097222222222	0.354166666666665	11.8541666666667	0.354166666666665	13.125	0.0298769771528997	0.0254618072890663
1	27377250	27389923	12673	27383586.5	8.16666666666667	23.3333333333333	8.16666666666667	17.7222222222222	8.16666666666667	22	0.460815047021944	0.35
1	27390002	27397073	7071	27393537.5	14.7083333333333	26.0069444444445	14.7083333333333	17.5138888888889	14.7083333333333	17.3333333333333	0.839809674861221	0.565554072096128
1	27397099	27422140	25041	27409619.5	17.5833333333333	25.5	17.5833333333333	18.5833333333333	17.5833333333333	20.5	0.946188340807175	0.689542483660131
1	27422469	27631559	209090	27527014	16.75	26.5138888888889	16.75	25.8055555555556	16.75	22.6666666666667	0.649085037674919	0.631744368779466
1	27816886	27884402	67516	27850644	2.04166666666666	7.65972222222222	2.04166666666666	9.84722222222222	2.04166666666666	7.5625	0.207334273624824	0.266545784224841
1	27926645	28075321	148676	28000983	2.625	18.5347222222222	2.625	18.0416666666667	2.625	18.3333333333333	0.145496535796767	0.141626077182465
1	28451085	28595916	144831	28523500.5	4.83333333333333	17.9791666666667	4.83333333333333	17.5416666666667	4.83333333333333	16.9375	0.275534441805226	0.26882966396292
1	28643771	28683349	39578	28663560	9.75	32.125	9.75	22.4166666666667	9.75	32.125	0.434944237918216	0.303501945525292
1	28963072	29156707	193635	29059889.5	7.52083333333333	19.625	7.52083333333333	15.2083333333333	7.52083333333333	17.9375	0.494520547945205	0.383227176220807
1	29156819	29172631	15812	29164725	5.79166666666667	20.5277777777778	5.79166666666667	17.9027777777778	5.79166666666667	19.8541666666667	0.323506594259115	0.282138024357239
1	29172634	29259053	86419	29215843.5	2.10416666666667	9.00694444444444	2.10416666666667	11.0208333333333	2.10416666666667	7.85416666666667	0.190926275992439	0.233616037008482
1	29401946	29520221	118275	29461083.5	2.58333333333334	12.3541666666667	2.58333333333334	9.52777777777778	2.58333333333334	6.85416666666667	0.271137026239067	0.209106239460371
1	29758590	29963822	205232	29861206	2.60416666666667	12.9097222222222	2.60416666666667	9.24305555555556	2.60416666666667	12.2291666666667	0.281743050338092	0.201721355567509
1	29963881	29972277	8396	29968079	0.604166666666666	5.60416666666667	0.604166666666666	6.91666666666667	0.604166666666666	4.97916666666667	0.0873493975903613	0.107806691449814
1	29972295	30029878	57583	30001086.5	0.375000000000001	3.68055555555556	0.375000000000001	6.61805555555556	0.375000000000001	3.02083333333333	0.056663168940189	0.10188679245283
1	30029895	30054864	24969	30042379.5	0.0208333333333336	2.52777777777778	0.0208333333333336	6.35416666666666	0.0208333333333336	1.83333333333333	0.00327868852459021	0.00824175824175834
1	30211739	30265818	54079	30238778.5	5.72916666666667	15.1111111111111	5.72916666666667	16.4236111111111	5.72916666666667	14.5833333333333	0.348837209302326	0.379136029411765
1	30265836	30438692	172856	30352264	9.77083333333334	24.3958333333333	9.77083333333334	20.7013888888889	9.77083333333334	23.7916666666667	0.471989265347199	0.400512382578992
1	30455347	30658778	203431	30557062.5	5.41666666666667	16.8680555555556	5.41666666666667	13.8888888888889	5.41666666666667	15.1458333333333	0.39	0.321119802387814
1	30658891	30691643	32752	30675267	0.354166666666667	13.3888888888889	0.354166666666667	14.9930555555556	0.354166666666667	11.6458333333333	0.0236220472440945	0.0264522821576764
1	30691649	30789333	97684	30740491	3	13.2569444444444	3	14	3	12.1458333333333	0.214285714285714	0.226296490309062
1	31864954	31920987	56033	31892970.5	1.29166666666666	12.0069444444444	1.29166666666666	11.8333333333333	1.29166666666666	10.5208333333333	0.109154929577464	0.107576633892423
1	31979469	32090950	111481	32035209.5	3.41666666666666	16.4791666666667	3.41666666666666	15.2083333333333	3.41666666666666	15.3958333333333	0.224657534246575	0.207332490518331
1	32166819	32202063	35244	32184441	2.85416666666667	8.34722222222222	2.85416666666667	13.9027777777778	2.85416666666667	7.125	0.205294705294705	0.341930116472546
1	32207250	32258128	50878	32232689	1	9.18055555555556	1	10.25	1	8.41666666666667	0.0975609756097561	0.1089258698941
1	32313319	32530791	217472	32422055	2.39583333333334	7.71527777777778	2.39583333333334	8.54166666666667	2.39583333333334	4.91666666666667	0.280487804878049	0.310531053105311
1	33121258	33324484	203226	33222871	0.250000000000001	14.5972222222222	0.250000000000001	12.1388888888889	0.250000000000001	12.7708333333333	0.0205949656750573	0.0171265461465272
1	33326256	33411471	85215	33368863.5	9.83333333333333	36.9722222222222	9.83333333333333	15.9583333333333	9.83333333333333	36.9166666666667	0.616187989556136	0.265965439519159
1	34120326	34120984	658	34120655	0.0416666666666673	4.30555555555556	0.0416666666666673	9.75694444444444	0.0416666666666673	1.89583333333334	0.00427046263345202	0.00967741935483885
1	34121017	34250178	129161	34185597.5	0.562500000000001	10.5833333333333	0.562500000000001	7.86805555555556	0.562500000000001	7.04166666666667	0.0714916151809357	0.0531496062992126
1	34250180	34295103	44923	34272641.5	3.02083333333334	7.54861111111111	3.02083333333334	8.36111111111111	3.02083333333334	3.5625	0.361295681063123	0.400183992640295
1	34295145	34610050	314905	34452597.5	0.833333333333333	10.0347222222222	0.833333333333333	12.4236111111111	0.833333333333333	5.5	0.0670765790944662	0.0830449826989619
1	34610098	34667862	57764	34638980	3.375	11.3333333333333	3.375	11.0972222222222	3.375	7.58333333333333	0.304130162703379	0.297794117647059
1	34667878	34812326	144448	34740102	0.208333333333331	11.7361111111111	0.208333333333331	12.5694444444444	0.208333333333331	11.3958333333333	0.016574585635359	0.0177514792899407
1	34812402	34830940	18538	34821671	2.64583333333334	11.3263888888889	2.64583333333334	12.5590277777778	2.64583333333334	11.0625	0.210671827481338	0.233599019006745
1	34899363	34940921	41558	34920142	12.7916666666667	22.8333333333333	12.7916666666667	22.8472222222222	12.7916666666667	20.4791666666667	0.559878419452888	0.56021897810219
1	34944494	35048532	104038	34996513	2.29166666666667	18.6111111111111	2.29166666666667	16.9583333333333	2.29166666666667	18	0.135135135135135	0.123134328358209
1	35048722	35150917	102195	35099819.5	3.58333333333333	11.2291666666667	3.58333333333333	11.4722222222222	3.58333333333333	10.2708333333333	0.312348668280872	0.319109461966605
1	35150967	35221416	70449	35186191.5	0.895833333333333	11.3402777777778	0.895833333333333	13.2013888888889	0.895833333333333	10.1041666666667	0.067859021567596	0.0789957134109002
1	35244919	35582333	337414	35413626	5.375	12.5277777777778	5.375	12.7916666666667	5.375	9.25	0.420195439739413	0.429046563192904
1	35583163	35741902	158739	35662532.5	3.375	19.3055555555556	3.375	21.0972222222222	3.375	18.25	0.159973666886109	0.174820143884892
1	35917662	35929486	11824	35923574	0.833333333333331	7.875	0.833333333333331	10.6111111111111	0.833333333333331	5.875	0.0785340314136124	0.105820105820105
1	35929944	35974710	44766	35952327	5.33333333333333	12.8125	5.33333333333333	13.0659722222222	5.33333333333333	11.5	0.40818495880946	0.416260162601626
1	35974723	35996228	21505	35985475.5	9.95833333333333	18.7777777777778	9.95833333333333	14.7083333333333	9.95833333333333	15.0833333333333	0.677053824362606	0.530325443786982
1	35996259	36166296	170037	36081277.5	0.791666666666667	13.2291666666667	0.791666666666667	14.0972222222222	0.791666666666667	12.4791666666667	0.0561576354679803	0.0598425196850394
1	36166446	36357137	190691	36261791.5	3.20833333333333	22.1041666666667	3.20833333333333	13.9861111111111	3.20833333333333	22.0208333333333	0.229394240317775	0.145146088595664
1	36357156	36408899	51743	36383027.5	8.875	13.3541666666667	8.875	12.2430555555556	8.875	13.2708333333333	0.724900737379467	0.664586583463339
1	36410794	36511832	101038	36461313	6.45833333333334	15.2777777777778	6.45833333333334	14.3472222222222	6.45833333333334	14.8541666666667	0.450145208131656	0.422727272727273
1	36512589	36575737	63148	36544163	11.5833333333333	24.8472222222222	11.5833333333333	17.7638888888889	11.5833333333333	24.6875	0.652071931196247	0.46618222470654
1	36916436	37157154	240718	37036795	6.45833333333333	18.9583333333333	6.45833333333333	16.4861111111111	6.45833333333333	14.625	0.391743892165122	0.34065934065934
1	37157164	37208904	51740	37183034	2.04166666666667	11.2916666666667	2.04166666666667	11.125	2.04166666666667	9.70833333333334	0.183520599250936	0.180811808118081
1	37215534	37223424	7890	37219479	1.58333333333333	8.3125	1.58333333333333	13	1.58333333333333	7.4375	0.121794871794872	0.19047619047619
1	37389605	37392268	2663	37390936.5	0.833333333333333	4.48611111111111	0.833333333333333	9.39583333333333	0.833333333333333	2.16666666666667	0.0886917960088691	0.185758513931888
1	37392470	37548571	156101	37470520.5	0.479166666666667	7.01388888888889	0.479166666666667	7.25694444444444	0.479166666666667	6.0625	0.0660287081339713	0.0683168316831683
1	37548601	37784504	235903	37666552.5	1.41666666666667	14.1527777777778	1.41666666666667	8.79166666666667	1.41666666666667	12.9583333333333	0.161137440758294	0.100098135426889
1	38009344	38125579	116235	38067461.5	0.25	7.32638888888889	0.25	10.4444444444444	0.25	3.04166666666667	0.023936170212766	0.0341232227488152
1	38125640	38198274	72634	38161957	4.54166666666667	20.4861111111111	4.54166666666667	17.8472222222222	4.54166666666667	18.8541666666667	0.254474708171206	0.221694915254237
1	38198338	38205179	6841	38201758.5	7.95833333333333	14.2013888888889	7.95833333333333	10.2361111111111	7.95833333333333	12.8958333333333	0.777476255088195	0.56039119804401
1	38205225	38250812	45587	38228018.5	10.8333333333333	20.2291666666667	10.8333333333333	15.375	10.8333333333333	17.625	0.70460704607046	0.535530381050464
1	38269174	38318998	49824	38294086	0.6875	7.34722222222222	0.6875	11.5486111111111	0.6875	6.20833333333333	0.0595309681298858	0.0935727788279773
1	38319010	38449252	130242	38384131	3.45833333333333	11.8888888888889	3.45833333333333	10.1666666666667	3.45833333333333	10.2083333333333	0.340163934426229	0.29088785046729
1	38449296	38450877	1581	38450086.5	0.145833333333333	1.49305555555556	0.145833333333333	11.8472222222222	0.145833333333333	1.08333333333333	0.0123094958968347	0.0976744186046512
1	38450921	38550929	100008	38500925	11.4791666666667	23.9583333333333	11.4791666666667	14.9722222222222	11.4791666666667	23.1875	0.76669758812616	0.479130434782609
1	39051826	39070263	18437	39061044.5	2	11.2847222222222	2	16	2	11.0625	0.125	0.177230769230769
1	39070365	39223386	153021	39146875.5	0.749999999999998	12.9444444444444	0.749999999999998	10.9722222222222	0.749999999999998	12.2291666666667	0.0683544303797466	0.0579399141630899
1	39223433	39565123	341690	39394278	3.16666666666667	25.6527777777778	3.16666666666667	9.25000000000001	3.16666666666667	25.6041666666667	0.342342342342343	0.123443421765025
1	39602969	39743643	140674	39673306	9.04166666666667	30.7986111111111	9.04166666666667	12.7916666666667	9.04166666666667	30.7708333333333	0.706840390879479	0.293573844419391
1	39815026	39855401	40375	39835213.5	2.3125	9.45138888888889	2.3125	10.6388888888889	2.3125	8.85416666666667	0.217362924281984	0.244673034533431
1	39855451	39991484	136033	39923467.5	5.54166666666666	18.9513888888889	5.54166666666666	11.0972222222222	5.54166666666666	18.4583333333333	0.499374217772215	0.292414803957493
1	39991654	40022057	30403	40006855.5	4.02083333333333	20.3958333333333	4.02083333333333	9.125	4.02083333333333	19.9791666666667	0.440639269406393	0.197139938712973
1	40022163	40127162	104999	40074662.5	1.75	14.5138888888889	1.75	11.0416666666667	1.75	13.5625	0.158490566037736	0.120574162679426
1	40127195	40131204	4009	40129199.5	0.625000000000001	9.71527777777778	0.625000000000001	11.9861111111111	0.625000000000001	9.0625	0.0521436848203941	0.0643316654753397
1	40131311	40147120	15809	40139215.5	0.750000000000001	9.16666666666666	0.750000000000001	11.6666666666667	0.750000000000001	8.22916666666667	0.0642857142857144	0.081818181818182
1	40235337	40279624	44287	40257480.5	3.20833333333333	9.78472222222222	3.20833333333333	7.125	3.20833333333333	9.47916666666667	0.450292397660818	0.327892122072391
1	40279654	40356897	77243	40318275.5	5.33333333333333	15.0972222222222	5.33333333333333	6.66666666666667	5.33333333333333	14.7916666666667	0.8	0.353265869365225
1	40419955	40427657	7702	40423806	3.20833333333333	9.39583333333334	3.20833333333333	11.7222222222222	3.20833333333333	8.5625	0.273696682464455	0.341463414634146
1	40512120	40563666	51546	40537893	1.91666666666666	9.90277777777778	1.91666666666666	10.0833333333333	1.91666666666666	5.875	0.190082644628099	0.193548387096774
1	40653277	40888087	234810	40770682	0.499999999999996	9.98611111111111	0.499999999999996	11.8888888888889	0.499999999999996	9.5625	0.0420560747663548	0.0500695410292069
1	40917129	40958274	41145	40937701.5	1.5	7.81944444444445	1.5	11	1.5	4.47916666666667	0.136363636363636	0.191829484902309
1	41238122	41247366	9244	41242744	2.72916666666667	10.8888888888889	2.72916666666667	11.5069444444444	2.72916666666667	9.10416666666667	0.237175618587809	0.250637755102041
1	41250716	41433757	183041	41342236.5	2.8125	8.71527777777778	2.8125	12.1666666666667	2.8125	8.25	0.231164383561644	0.322709163346614
1	41468800	41485648	16848	41477224	1.41666666666667	13.3958333333333	1.41666666666667	15.7013888888889	1.41666666666667	12.4375	0.0902255639097745	0.105754276827372
1	41485909	41769844	283935	41627876.5	1.16666666666667	7.78472222222222	1.16666666666667	12.3472222222222	1.16666666666667	6.83333333333333	0.094488188976378	0.149866190900981
1	41769869	41847184	77315	41808526.5	1.41666666666667	6.99305555555556	1.41666666666667	9.75694444444444	1.41666666666667	5.08333333333333	0.145195729537367	0.202581926514399
1	41848082	41951037	102955	41899559.5	5.625	19.3263888888889	5.625	15.2361111111111	5.625	18.7291666666667	0.36918869644485	0.29105282069709
1	41951303	41955568	4265	41953435.5	0.6875	6.35416666666667	0.6875	8.22916666666667	0.6875	5.22916666666667	0.0835443037974684	0.108196721311475
1	41956061	41975522	19461	41965791.5	7	15.3541666666667	7	11.1805555555556	7	15	0.626086956521739	0.455902306648575
1	42033190	42166756	133566	42099973	1.85416666666667	9.72222222222222	1.85416666666667	8.88888888888888	1.85416666666667	8.6875	0.20859375	0.190714285714286
1	42166789	42493829	327040	42330309	3.125	13.6875	3.125	15.1527777777778	3.125	12.6875	0.206232813932173	0.228310502283105
1	42493927	42852643	358716	42673285	3.625	12.7986111111111	3.625	11	3.625	9.89583333333333	0.329545454545455	0.283233857840477
1	42852680	42874102	21422	42863391	4.125	15.2083333333333	4.125	10.5138888888889	4.125	13.0625	0.392338177014531	0.271232876712329
1	42874113	42927542	53429	42900827.5	7.75	22.0486111111111	7.75	12.5	7.75	20.2916666666667	0.62	0.351496062992126
1	42927564	43057150	129586	42992357	1.95833333333333	6.36805555555556	1.95833333333333	12.0694444444444	1.95833333333333	6.14583333333333	0.162255466052935	0.30752453653217
1	43154746	43349439	194693	43252092.5	3.58333333333333	9.22916666666667	3.58333333333333	7.81944444444444	3.58333333333333	8.29166666666667	0.458259325044405	0.388261851015801
1	43349671	43382555	32884	43366113	0.625	4.11111111111111	0.625	8.19444444444444	0.625	2.8125	0.0762711864406779	0.152027027027027
1	43458368	43459233	865	43458800.5	0.416666666666667	8.625	0.416666666666667	14.0208333333333	0.416666666666667	8.625	0.0297176820208024	0.0483091787439614
1	43684490	43759503	75013	43721996.5	7.87500000000001	14.2916666666667	7.87500000000001	15.8194444444444	7.87500000000001	13.2083333333333	0.497805092186128	0.551020408163266
1	43759859	43768150	8291	43764004.5	0.375000000000002	9.00694444444444	0.375000000000002	10.6527777777778	0.375000000000002	6.83333333333333	0.0352020860495439	0.0416345412490364
1	43768177	44163710	395533	43965943.5	2.66666666666666	18.1944444444444	2.66666666666666	11.4166666666667	2.66666666666666	17.9583333333333	0.233576642335766	0.146564885496183
1	44332442	44347563	15121	44340002.5	8.45833333333334	15.2847222222222	8.45833333333334	16.125	8.45833333333334	12.375	0.524547803617571	0.55338482507951
1	44721438	44930918	209480	44826178	3.4375	15.6597222222222	3.4375	12.8472222222222	3.4375	14.6041666666667	0.267567567567567	0.219512195121951
1	44931020	44994971	63951	44962995.5	7.83333333333334	19.25	7.83333333333334	15.75	7.83333333333334	17.4166666666667	0.497354497354498	0.406926406926407
1	45278811	45441714	162903	45360262.5	1.54166666666667	21.2361111111111	1.54166666666667	15.6388888888889	1.54166666666667	21.125	0.0985790408525756	0.0725964682799216
1	45696196	45749467	53271	45722831.5	2.02083333333333	6.63194444444444	2.02083333333333	7.56597222222222	2.02083333333333	3.95833333333333	0.267094997705369	0.304712041884817
1	45820447	45821111	664	45820779	2.54166666666667	9.90972222222222	2.54166666666667	11.1145833333333	2.54166666666667	7.9375	0.228678537956888	0.256482130343378
1	46081051	46141342	60291	46111196.5	2.85416666666667	9.125	2.85416666666667	12	2.85416666666667	7.25	0.237847222222222	0.312785388127854
1	46141443	46415008	273565	46278225.5	2.60416666666667	8.6875	2.60416666666667	9.70138888888889	2.60416666666667	7.39583333333333	0.268432355046528	0.299760191846523
1	46415012	46502068	87056	46458540	1.5	15.8680555555556	1.5	10.0555555555556	1.5	15.5833333333333	0.149171270718232	0.0945295404814005
1	46502085	46551955	49870	46527020	3.20833333333334	25.7222222222222	3.20833333333334	9.31944444444445	3.20833333333334	25.5833333333333	0.344262295081967	0.124730021598272
1	46552329	46627973	75644	46590151	2.20833333333334	20.2013888888889	2.20833333333334	11.2361111111111	2.20833333333334	19.9791666666667	0.196538936959209	0.109315916122379
1	46627980	46844495	216515	46736237.5	1.45833333333333	11.1666666666667	1.45833333333333	10.2361111111111	1.45833333333333	10.0208333333333	0.14246947082768	0.130597014925373
1	46844560	46931085	86525	46887822.5	1.41666666666666	7.68055555555555	1.41666666666666	11.8680555555556	1.41666666666666	5.60416666666666	0.1193680514921	0.184448462929475
1	46931137	47136437	205300	47033787	3.47916666666667	9.79861111111111	3.47916666666667	13.7708333333333	3.47916666666667	8.85416666666667	0.252647503782148	0.355067328136074
1	47136444	47175091	38647	47155767.5	3.60416666666667	12.5	3.60416666666667	14.8958333333333	3.60416666666667	11	0.241958041958042	0.288333333333333
1	47298234	47322205	23971	47310219.5	7.875	13.3125	7.875	11.5416666666667	7.875	8.6875	0.682310469314079	0.591549295774648
1	47323439	47481465	158026	47402452	1.70833333333334	11.7013888888889	1.70833333333334	10.3194444444444	1.70833333333334	8.95833333333334	0.165545087483177	0.145994065281899
1	47481518	47516348	34830	47498933	1.37500000000001	9.6875	1.37500000000001	10.6527777777778	1.37500000000001	9.54166666666667	0.129074315514994	0.141935483870968
1	47516698	47691092	174394	47603895	12.0833333333333	29.5972222222222	12.0833333333333	14.2083333333333	12.0833333333333	28.25	0.850439882697947	0.408259033317691
1	47904310	47996333	92023	47950321.5	4.58333333333333	13.6666666666667	4.58333333333333	12.6944444444444	4.58333333333333	13.3125	0.361050328227571	0.335365853658536
1	48214452	48304368	89916	48259410	0.0833333333333338	6.54166666666666	0.0833333333333338	9.20833333333334	0.0833333333333338	1.72916666666667	0.00904977375565616	0.0127388535031848
1	48652039	48683742	31703	48667890.5	3.33333333333333	14.0763888888889	3.33333333333333	11.9861111111111	3.33333333333333	12.7708333333333	0.278099652375434	0.236803157375432
1	48683765	48756421	72656	48720093	2.75000000000001	12.6805555555556	2.75000000000001	9.125	2.75000000000001	8.91666666666667	0.301369863013699	0.216867469879519
1	48756445	48952101	195656	48854273	3.16666666666667	13.6527777777778	3.16666666666667	10.0833333333333	3.16666666666667	10.125	0.31404958677686	0.231943031536114
1	48952126	48980757	28631	48966441.5	0.33333333333333	8.6875	0.33333333333333	8.11111111111111	0.33333333333333	8.02083333333333	0.0410958904109584	0.0383693045563545
1	48980813	49126466	145653	49053639.5	0.541666666666669	4.09027777777778	0.541666666666669	7.66666666666667	0.541666666666669	2.91666666666667	0.0706521739130438	0.132427843803056
1	49127603	49274793	147190	49201198	2.77083333333334	12.2361111111111	2.77083333333334	9.52777777777778	2.77083333333334	11.2916666666667	0.290816326530612	0.22644721906924
1	49275647	49314179	38532	49294913	4.31250000000001	17.1597222222222	4.31250000000001	13.6875	4.31250000000001	15.375	0.315068493150685	0.25131525698098
1	49314209	49352069	37860	49333139	3.5625	8.30555555555556	3.5625	8.47916666666667	3.5625	6.45833333333333	0.42014742014742	0.428929765886288
1	49352445	49375241	22796	49363843	3.72916666666667	12.8125	3.72916666666667	9.63194444444444	3.72916666666667	11.4583333333333	0.387166546503245	0.291056910569106
1	49375245	49613170	237925	49494207.5	1.16666666666667	5.72916666666667	1.16666666666667	8.69444444444445	1.16666666666667	4.125	0.134185303514377	0.203636363636364
1	49614302	49650830	36528	49632566	0.749999999999999	9.63194444444445	0.749999999999999	11.3333333333333	0.749999999999999	8.95833333333333	0.0661764705882352	0.0778658976207641
1	49655993	49766863	110870	49711428	5.16666666666667	11.5486111111111	5.16666666666667	11.6736111111111	5.16666666666667	10.3541666666667	0.442593694229625	0.447384245339748
1	49766924	49782380	15456	49774652	2.70833333333334	7.82638888888889	2.70833333333334	9.28472222222222	2.70833333333334	6.1875	0.291697830964847	0.346051464063887
1	49782536	49794823	12287	49788679.5	3.72916666666667	9.36111111111111	3.72916666666667	10.0625	3.72916666666667	6.41666666666667	0.370600414078675	0.398367952522256
1	49794825	49821419	26594	49808122	1.39583333333333	9.47916666666667	1.39583333333333	10.8680555555556	1.39583333333333	5.4375	0.128434504792332	0.147252747252747
1	49821434	50092307	270873	49956870.5	6.41666666666667	13.2013888888889	6.41666666666667	11.0833333333333	6.41666666666667	9.5625	0.578947368421053	0.486059968437665
1	50092308	50100571	8263	50096439.5	8.58333333333333	11.9305555555556	8.58333333333333	11.0277777777778	8.58333333333333	11.6666666666667	0.778337531486146	0.719441210710128
1	50100602	50327024	226422	50213813	8.04166666666667	8.83333333333334	8.04166666666667	11.2083333333333	8.04166666666667	7.875	0.717472118959108	0.910377358490566
1	50327916	50420476	92560	50374196	3.08333333333333	13.1944444444444	3.08333333333333	15.3888888888889	3.08333333333333	12.125	0.200361010830325	0.233684210526316
1	50420483	50612713	192230	50516598	0.75	12.2222222222222	0.75	16.6319444444444	0.75	11.2291666666667	0.0450939457202505	0.0613636363636364
1	50613119	50639138	26019	50626128.5	5.60416666666667	10.3194444444444	5.60416666666667	12.4583333333333	5.60416666666667	8.77083333333334	0.449832775919732	0.543068640646029
1	50639140	50644959	5819	50642049.5	2.33333333333334	5.60416666666667	2.33333333333334	6.22222222222222	2.33333333333334	5.08333333333334	0.375	0.41635687732342
1	50645123	50660164	15041	50652643.5	3.1875	7.97916666666667	3.1875	12.4166666666667	3.1875	7	0.256711409395973	0.399477806788512
1	50660197	50664022	3825	50662109.5	2.04166666666666	5.20833333333333	2.04166666666666	10.9305555555556	2.04166666666666	4.27083333333334	0.186785260482846	0.392
1	50664100	50675651	11551	50669875.5	2.85416666666667	8.06944444444445	2.85416666666667	12.5763888888889	2.85416666666667	8	0.226946438431806	0.353700516351119
1	50675664	50682718	7054	50679191	4.66666666666667	8.74305555555556	4.66666666666667	12.0694444444444	4.66666666666667	8.47916666666667	0.386651323360184	0.533756949960286
1	50682739	50691940	9201	50687339.5	3.58333333333333	8.58333333333334	3.58333333333333	12.0416666666667	3.58333333333333	7.83333333333334	0.29757785467128	0.41747572815534
1	50711142	50761317	50175	50736229.5	8.35416666666667	11.2013888888889	8.35416666666667	11.1875	8.35416666666667	10.3958333333333	0.746741154562384	0.745815251084935
1	50761369	50779202	17833	50770285.5	10.25	14.9583333333333	10.25	13.5416666666667	10.25	14.8333333333333	0.756923076923077	0.685236768802228
1	50779205	50859413	80208	50819309	9.97916666666667	13.8333333333333	9.97916666666667	13.3541666666667	9.97916666666667	13.5416666666667	0.747269890795632	0.721385542168675
1	50859416	51011265	151849	50935340.5	4.02083333333333	16.7569444444444	4.02083333333333	14.9097222222222	4.02083333333333	15.5208333333333	0.269678621332091	0.239950269374223
1	51011924	51015987	4063	51013955.5	1.9375	17.8333333333333	1.9375	11.5208333333333	1.9375	17.2708333333333	0.168173598553345	0.108644859813084
1	51293395	51316252	22857	51304823.5	0.0416666666666673	11.3472222222222	0.0416666666666673	10.9027777777778	0.0416666666666673	8.45833333333334	0.00382165605095547	0.00367197062423506
1	51316263	51389717	73454	51352990	0.666666666666666	13.5763888888889	0.666666666666666	12.8333333333333	0.666666666666666	12.6041666666667	0.0519480519480519	0.0491048593350383
1	51390031	51458235	68204	51424133	1.125	11.4791666666667	1.125	13.3333333333333	1.125	10.1458333333333	0.0843750000000001	0.0980036297640654
1	51459096	51525359	66263	51492227.5	6.33333333333333	19.6736111111111	6.33333333333333	13.5	6.33333333333333	17.9791666666667	0.469135802469136	0.32192022590893
1	51525376	51528570	3194	51526973	17.3333333333333	43.5	17.3333333333333	18.25	17.3333333333333	43.5	0.949771689497717	0.398467432950191
1	51528598	51770277	241679	51649437.5	3.41666666666666	14.7916666666667	3.41666666666666	15.0694444444444	3.41666666666666	13.8333333333333	0.226728110599078	0.230985915492957
1	51789249	52079121	289872	51934185	1.95833333333333	23.0555555555556	1.95833333333333	19.0277777777778	1.95833333333333	22.75	0.102919708029197	0.0849397590361446
1	52079323	52152597	73274	52115960	2.91666666666667	17.4513888888889	2.91666666666667	16.25	2.91666666666667	16.3541666666667	0.17948717948718	0.167130919220056
1	52153507	52250501	96994	52202004	0.416666666666666	12.0763888888889	0.416666666666666	8.56944444444444	0.416666666666666	11.1666666666667	0.0486223662884926	0.034502587694077
1	52391508	52456096	64588	52423802	3.75	11.4027777777778	3.75	11.2638888888889	3.75	6.41666666666667	0.332922318125771	0.328867235079172
1	52456193	52460083	3890	52458138	7.89583333333333	16.4791666666667	7.89583333333333	16.5208333333333	7.89583333333333	8.5625	0.477931904161412	0.479140328697851
1	52460316	52560493	100177	52510404.5	3.375	10.9305555555556	3.375	10.7222222222222	3.375	8.22916666666667	0.314766839378238	0.308767471410419
1	52638490	52772231	133741	52705360.5	1.91666666666667	12.8541666666667	1.91666666666667	14.1666666666667	1.91666666666667	11.0833333333333	0.135294117647059	0.149108589951378
1	52772507	52779294	6787	52775900.5	1.47916666666667	5.35416666666667	1.47916666666667	9.66319444444444	1.47916666666667	3.72916666666667	0.153072224218469	0.276264591439689
1	52779304	52796753	17449	52788028.5	3.16666666666667	5.65277777777778	3.16666666666667	7.93055555555556	3.16666666666667	4.64583333333334	0.399299474605955	0.56019656019656
1	52796835	52811372	14537	52804103.5	1.375	18.9930555555556	1.375	15.4166666666667	1.375	18.4375	0.0891891891891894	0.0723948811700184
1	52811385	53066448	255063	52938916.5	1.33333333333333	14.8888888888889	1.33333333333333	14.5	1.33333333333333	13.9166666666667	0.0919540229885056	0.0895522388059701
1	53270527	53411663	141136	53341095	1.99999999999999	18.2916666666667	1.99999999999999	21	1.99999999999999	17.9583333333333	0.0952380952380949	0.109339407744874
1	53992307	54004682	12375	53998494.5	3.72916666666667	10.2777777777778	3.72916666666667	10.7986111111111	3.72916666666667	6.875	0.345337620578778	0.362837837837838
1	54004765	54155751	150986	54080258	2.54166666666667	11.8402777777778	2.54166666666667	11.0833333333333	2.54166666666667	10.25	0.229323308270677	0.21466275659824
1	54155759	54264284	108525	54210021.5	1.3125	6.73611111111111	1.3125	9.5	1.3125	5.75	0.138157894736842	0.194845360824742
1	54264288	54346547	82259	54305417.5	1	11.9722222222222	1	10.5416666666667	1	11.0625	0.0948616600790514	0.0835266821345708
1	54346548	54463952	117404	54405250	4.72916666666667	12.2638888888889	4.72916666666667	11.1805555555556	4.72916666666667	12.0208333333333	0.422981366459627	0.385617214043035
1	54463982	54522598	58616	54493290	4.625	10.4513888888889	4.625	8.58333333333333	4.625	10.1458333333333	0.538834951456311	0.442524916943522
1	54828576	54853567	24991	54841071.5	6.75	18.8055555555556	6.75	12.6666666666667	6.75	18.6875	0.532894736842106	0.358936484490399
1	54853590	54856776	3186	54855183	4.75	24.0625	4.75	19.9305555555556	4.75	23.6875	0.238327526132404	0.197402597402597
1	54856777	54920227	63450	54888502	8.875	33.0416666666667	8.875	23.875	8.875	33.0416666666667	0.371727748691099	0.26860025220681
1	54920236	55074147	153911	54997191.5	1.5	10.75	1.5	13.6666666666667	1.5	10.3125	0.109756097560976	0.13953488372093
1	55287076	55446084	159008	55366580	0.562499999999999	11.4166666666667	0.562499999999999	9.65972222222222	0.562499999999999	11	0.0582314881380301	0.0492700729927007
1	56568612	56588587	19975	56578599.5	0.791666666666665	8.65972222222222	0.791666666666665	14.1527777777778	0.791666666666665	6.10416666666667	0.0559371933267908	0.0914194065757817
1	56588607	56748934	160327	56668770.5	3.25	14.6180555555556	3.25	13.7222222222222	3.25	13.3125	0.236842105263158	0.222327790973872
1	56749821	56883550	133729	56816685.5	2.83333333333333	15.4166666666667	2.83333333333333	15.6527777777778	2.83333333333333	14.7083333333333	0.181011535048802	0.183783783783784
1	57099593	57258098	158505	57178845.5	3.14583333333334	11.8680555555556	3.14583333333334	11.2916666666667	3.14583333333334	10.7291666666667	0.27859778597786	0.265067290813341
1	57258135	57482758	224623	57370446.5	1.95833333333333	13.2638888888889	1.95833333333333	16.1666666666667	1.95833333333333	11.4583333333333	0.121134020618557	0.147643979057592
1	57483520	57891766	408246	57687643	4.5625	12.2222222222222	4.5625	10.4097222222222	4.5625	10.1875	0.438292194796531	0.373295454545455
1	57891769	58071061	179292	57981415	0.5	13.5416666666667	0.5	10.6944444444444	0.5	13.1458333333333	0.0467532467532468	0.0369230769230769
1	58649630	58650706	1076	58650168	0.708333333333332	2.65277777777778	0.708333333333332	9.63194444444444	0.708333333333332	1.54166666666667	0.0735400144196105	0.267015706806282
1	58650734	58718749	68015	58684741.5	0.625	8.72222222222223	0.625	12.7569444444444	0.625	8.0625	0.0489929232444203	0.071656050955414
1	58718842	58800523	81681	58759682.5	1.1875	10.3958333333333	1.1875	12.9027777777778	1.1875	7.79166666666667	0.0920344456404735	0.114228456913827
1	59308420	59497368	188948	59402894	2.45833333333334	11.9930555555556	2.45833333333334	7.85416666666667	2.45833333333334	11.0416666666667	0.312997347480106	0.204979733642154
1	60924542	61024043	99501	60974292.5	1.875	11.0763888888889	1.875	13.9305555555556	1.875	8.95833333333333	0.134596211365902	0.169278996865204
1	61025639	61455307	429668	61240473	1.66666666666667	18.6805555555556	1.66666666666667	9.15277777777778	1.66666666666667	17.1458333333333	0.182094081942337	0.0892193308550188
1	61455314	61630925	175611	61543119.5	1.25	7.48611111111111	1.25	8.08333333333334	1.25	6.72916666666667	0.154639175257732	0.166975881261595
1	61934489	62176860	242371	62055674.5	0.354166666666667	11	0.354166666666667	12.0555555555556	0.354166666666667	10.4791666666667	0.0293778801843318	0.0321969696969697
1	62445725	62497416	51691	62471570.5	1.25	12	1.25	9.93055555555556	1.25	11.6041666666667	0.125874125874126	0.104166666666667
1	62497441	62676914	179473	62587177.5	3.6875	16.0625	3.6875	11.2569444444444	3.6875	15.7708333333333	0.32757557063541	0.229571984435798
1	62676919	62901954	225035	62789436.5	0.770833333333327	15.7986111111111	0.770833333333327	13.8263888888889	0.770833333333327	15.1041666666667	0.0557508789552984	0.0487912087912084
1	62902124	62943727	41603	62922925.5	5.6875	19.8472222222222	5.6875	15.4097222222222	5.6875	19.375	0.369085173501577	0.286564030790763
1	62943735	63012935	69200	62978335	19.1666666666667	35.5833333333333	19.1666666666667	19.1666666666667	19.1666666666667	35.5833333333333	1	0.53864168618267
1	63015357	63037599	22242	63026478	7.77083333333333	18.9513888888889	7.77083333333333	13.5416666666667	7.77083333333333	17.5	0.573846153846154	0.410040307805057
1	63037623	63048179	10556	63042901	0.291666666666669	12.3263888888889	0.291666666666669	12.6805555555556	0.291666666666669	12.0208333333333	0.0230010952902521	0.0236619718309861
1	63218670	63293161	74491	63255915.5	3.16666666666667	13.1319444444444	3.16666666666667	11.7916666666667	3.16666666666667	12.6041666666667	0.268551236749117	0.241142252776309
1	63293542	63332181	38639	63312861.5	7.29166666666667	14.9930555555556	7.29166666666667	13.7083333333333	7.29166666666667	13.7083333333333	0.531914893617021	0.486336266790181
1	63332190	63358605	26415	63345397.5	3.3125	7.92361111111111	3.3125	8.57638888888889	3.3125	6.64583333333334	0.386234817813765	0.418054338299737
1	63358692	63503079	144387	63430885.5	5.83333333333333	18.3541666666667	5.83333333333333	17.4861111111111	5.83333333333333	15.8541666666667	0.333598093725179	0.317820658342792
1	63617623	63665426	47803	63641524.5	1.22916666666667	4.04861111111111	1.22916666666667	7.15972222222222	1.22916666666667	2.70833333333333	0.171677982541222	0.303602058319039
1	63665589	63895438	229849	63780513.5	4.83333333333334	16.3541666666667	4.83333333333334	17.1527777777778	4.83333333333334	15.25	0.281781376518219	0.295541401273886
1	64013418	64123695	110277	64068556.5	2.41666666666666	15.2986111111111	2.41666666666666	13.8472222222222	2.41666666666666	13.5	0.174523570712136	0.15796640944167
1	64123714	64206500	82786	64165107	2.47916666666667	18.8819444444444	2.47916666666667	12.3784722222222	2.47916666666667	18.5416666666667	0.200280504908836	0.131298271423318
1	64834615	64836282	1667	64835448.5	1.625	4.15277777777778	1.625	9.48611111111111	1.625	2.0625	0.171303074670571	0.391304347826088
1	64836292	65092914	256622	64964603	0.625000000000001	5.45833333333333	0.625000000000001	9.42361111111111	0.625000000000001	3.77083333333334	0.0663227708179809	0.114503816793893
1	65092971	65359515	266544	65226243	0.916666666666665	7.38888888888889	0.916666666666665	9.25	0.916666666666665	5.8125	0.0990990990990989	0.12406015037594
1	65359732	65624158	264426	65491945	1.33333333333333	14.1805555555556	1.33333333333333	12.9861111111111	1.33333333333333	12.2708333333333	0.102673796791444	0.0940254652301665
1	66303670	66399003	95333	66351336.5	3.08333333333333	9.38194444444444	3.08333333333333	8.27083333333334	3.08333333333333	8.47916666666667	0.3727959697733	0.328645447816432
1	67138281	67238549	100268	67188415	1.20833333333333	12.1527777777778	1.20833333333333	14.2361111111111	1.20833333333333	5.9375	0.0848780487804878	0.0994285714285714
1	67238586	67415532	176946	67327059	9.91666666666667	16.1666666666667	9.91666666666667	15.375	9.91666666666667	11.6666666666667	0.644986449864499	0.61340206185567
1	67415597	67530380	114783	67472988.5	2.66666666666667	14.6875	2.66666666666667	14.3055555555556	2.66666666666667	10.5	0.186407766990292	0.181560283687944
1	68525268	68571404	46136	68548336	4.95833333333333	13.8888888888889	4.95833333333333	13.8888888888889	4.95833333333333	9.4375	0.357	0.357
1	69104194	69554285	450091	69329239.5	2.83333333333333	12.0138888888889	2.83333333333333	10.4444444444444	2.83333333333333	9.1875	0.27127659574468	0.235838150289017
1	69554302	69774316	220014	69664309	1.8125	16.0694444444444	1.8125	11.1180555555556	1.8125	15.5	0.163023110555902	0.112791702679343
1	69774398	70148127	373729	69961262.5	2.14583333333333	12.0763888888889	2.14583333333333	11.2152777777778	2.14583333333333	10.8958333333333	0.191331269349845	0.177688326624497
1	70148155	70256629	108474	70202392	0.375	5.31944444444445	0.375	10.0277777777778	0.375	3.39583333333333	0.0373961218836566	0.0704960835509139
1	70256855	70370527	113672	70313691	3.16666666666667	12.1736111111111	3.16666666666667	15.2916666666667	3.16666666666667	10.125	0.20708446866485	0.260125499144324
1	71029134	71110198	81064	71069666	0.916666666666666	9.84722222222222	0.916666666666666	11.4583333333333	0.916666666666666	8.39583333333333	0.0799999999999999	0.0930888575458391
1	71341619	71599688	258069	71470653.5	2.45833333333334	13.2291666666667	2.45833333333334	11.9305555555556	2.45833333333334	11.3958333333333	0.20605355064028	0.185826771653543
1	71600077	71807298	207221	71703687.5	3.52083333333334	12.2638888888889	3.52083333333334	14.7430555555556	3.52083333333334	11.5833333333333	0.238813000471032	0.287089467723669
1	71807304	72105156	297852	71956230	2.83333333333333	14.9375	2.83333333333333	13.0208333333333	2.83333333333333	13.2708333333333	0.2176	0.189679218967922
1	72105476	72214770	109294	72160123	4.97916666666667	11.6666666666667	4.97916666666667	11.8819444444444	4.97916666666667	6.6875	0.419053185271771	0.426785714285714
1	72214798	72407280	192482	72311039	1.5625	10.1041666666667	1.5625	12.9861111111111	1.5625	7.47916666666667	0.120320855614973	0.154639175257732
1	72407290	72826413	419123	72616851.5	0.5625	9.79166666666667	0.5625	11.5902777777778	0.5625	7.41666666666667	0.048532055122828	0.0574468085106383
1	72826502	72954434	127932	72890468	1.1875	10.7013888888889	1.1875	11.4791666666667	1.1875	8.27083333333333	0.103448275862069	0.110966904607398
1	72954438	73239120	284682	73096779	0.312499999999998	8.98611111111111	0.312499999999998	11.4444444444444	0.312499999999998	8	0.0273058252427183	0.0347758887171559
1	73239543	73882840	643297	73561191.5	0.291666666666666	9.10416666666667	0.291666666666666	8.48611111111111	0.291666666666666	7.79166666666667	0.0343698854337152	0.0320366132723112
1	73882898	74275386	392488	74079142	5.125	16.6736111111111	5.125	9.86805555555556	5.125	15.9375	0.519352568613652	0.307371928363182
1	74275416	74493980	218564	74384698	1.39583333333333	9.94444444444445	1.39583333333333	6.68055555555556	1.39583333333333	9.125	0.208939708939709	0.14036312849162
1	74493983	74774891	280908	74634437	2.58333333333333	13.125	2.58333333333333	13.1111111111111	2.58333333333333	12.5416666666667	0.197033898305085	0.196825396825397
1	74775265	74792049	16784	74783657	3.20833333333333	9.43055555555556	3.20833333333333	8.13888888888889	3.20833333333333	8.25	0.39419795221843	0.34020618556701
1	74792129	75151873	359744	74972001	3.5	10.8819444444444	3.5	6.29166666666667	3.5	9.60416666666667	0.556291390728477	0.32163369495852
1	75748093	76074961	326868	75911527	1.75	12.2083333333333	1.75	11	1.75	7.77083333333333	0.159090909090909	0.143344709897611
1	76173488	76188096	14608	76180792	0.562500000000001	4.36805555555556	0.562500000000001	9.09027777777778	0.562500000000001	2.08333333333333	0.0618792971734149	0.128775834658188
1	76191233	76245722	54489	76218477.5	3.54166666666667	7.45833333333333	3.54166666666667	9.36111111111111	3.54166666666667	4.89583333333333	0.378338278931751	0.474860335195531
1	76639202	76848355	209153	76743778.5	0.749999999999998	12.1875	0.749999999999998	14.375	0.749999999999998	11.9791666666667	0.0521739130434781	0.0615384615384614
1	77857714	78028929	171215	77943321.5	4.27083333333333	12.5555555555556	4.27083333333333	11.6319444444444	4.27083333333333	10.1458333333333	0.367164179104478	0.340154867256637
1	78028935	78207857	178922	78118396	1.29166666666667	13.9444444444444	1.29166666666667	18.3611111111111	1.29166666666667	10.4583333333333	0.0703479576399395	0.0926294820717131
1	79310639	79339476	28837	79325057.5	0.125	5.75694444444445	0.125	5.98611111111111	0.125	5.1875	0.0208816705336426	0.0217129071170084
1	79339572	79441758	102186	79390665	2.5	15	2.5	16.8333333333333	2.5	14.25	0.148514851485149	0.166666666666667
1	79714334	79735005	20671	79724669.5	2.75000000000001	6.36805555555556	2.75000000000001	7.56944444444445	2.75000000000001	3.5625	0.363302752293579	0.431842966194112
1	80078071	80093199	15128	80085635	0.520833333333332	2.0625	0.520833333333332	7.96527777777778	0.520833333333332	0.6875	0.0653879686137749	0.252525252525252
1	80093263	80547542	454279	80320402.5	1.47916666666667	17.2986111111111	1.47916666666667	13.8263888888889	1.47916666666667	12.2708333333333	0.106981416373682	0.0855078281814533
1	80547579	80710664	163085	80629121.5	2.75	14.4791666666667	2.75	11.4444444444444	2.75	11.9375	0.240291262135923	0.189928057553957
1	80710919	80822125	111206	80766522	2.02083333333333	14.1944444444444	2.02083333333333	10.5069444444444	2.02083333333333	13.2708333333333	0.192333113020489	0.142367906066536
1	80822452	80977457	155005	80899954.5	0.208333333333334	7.41666666666667	0.208333333333334	11.1180555555556	0.208333333333334	5.75	0.018738288569644	0.0280898876404495
1	80977519	81418141	440622	81197830	0.416666666666665	12.7777777777778	0.416666666666665	14.1215277777778	0.416666666666665	10.5625	0.0295057782149003	0.0326086956521738
1	81435439	81611282	175843	81523360.5	1.08333333333333	10.7777777777778	1.08333333333333	12.7777777777778	1.08333333333333	8.95833333333333	0.0847826086956522	0.100515463917526
1	82016092	82309258	293166	82162675	1.54166666666667	11.4861111111111	1.54166666666667	10.5763888888889	1.54166666666667	7.16666666666667	0.145764937623112	0.134220072551391
1	82309262	82713785	404523	82511523.5	0.0833333333333318	9.38194444444444	0.0833333333333318	9.125	0.0833333333333318	8.3125	0.00913242009132403	0.00888230940044395
1	82714045	83089776	375731	82901910.5	1.35416666666667	6.88194444444444	1.35416666666667	9.78472222222222	1.35416666666667	3.97916666666667	0.138396025550035	0.196770938446014
1	83883237	84067783	184546	83975510	5.125	22.6319444444444	5.125	15.3576388888889	5.125	21.875	0.333710151480895	0.226449831236576
1	84357433	84643172	285739	84500302.5	0.770833333333336	9.45833333333333	0.770833333333336	7.375	0.770833333333336	6.875	0.1045197740113	0.0814977973568285
1	84643188	84761631	118443	84702409.5	2.16666666666667	13.4305555555556	2.16666666666667	14.5486111111111	2.16666666666667	11.5625	0.148926014319809	0.161323681489142
1	84761647	85319181	557534	85040414	1.16666666666666	6.57638888888889	1.16666666666666	9.93055555555556	1.16666666666666	5.3125	0.117482517482517	0.17740232312566
1	85319934	85840241	520307	85580087.5	2.125	7.3125	2.125	7.79166666666667	2.125	5.0625	0.272727272727273	0.290598290598291
1	86011370	86175687	164317	86093528.5	5.875	14.4722222222222	5.875	10.8472222222222	5.875	12.0625	0.541613316261204	0.40595009596929
1	86368524	86601243	232719	86484883.5	2.85416666666667	11.8125	2.85416666666667	13.2152777777778	2.85416666666667	7.39583333333333	0.215974776668418	0.241622574955908
1	86602145	86637366	35221	86619755.5	2.625	12.4305555555556	2.625	14.8888888888889	2.625	10.875	0.176305970149254	0.211173184357542
1	86637379	86645132	7753	86641255.5	0.125000000000003	5.66666666666667	0.125000000000003	11.1527777777778	0.125000000000003	5.04166666666667	0.01120797011208	0.0220588235294123
1	86645170	86854899	209729	86750034.5	2.08333333333334	9.72222222222222	2.08333333333334	14.8888888888889	2.08333333333334	8.66666666666667	0.139925373134329	0.214285714285714
1	86862416	87166416	304000	87014416	12.4375	25.0138888888889	12.4375	20.5833333333333	12.4375	23.8541666666667	0.604251012145749	0.497223764575236
1	87167002	87261564	94562	87214283	6.20833333333334	9.59722222222222	6.20833333333334	10.2430555555556	6.20833333333334	8.4375	0.606101694915254	0.646888567293777
1	87261575	87404680	143105	87333127.5	9.95833333333333	17.0138888888889	9.95833333333333	13.2777777777778	9.95833333333333	14.25	0.75	0.58530612244898
1	87450499	87609663	159164	87530081	6.125	12.5972222222222	6.125	11.1111111111111	6.125	10.3333333333333	0.55125	0.486218302094818
1	87609669	87629573	19904	87619621	4.66666666666667	8.64583333333334	4.66666666666667	9.19444444444444	4.66666666666667	6.27083333333334	0.507552870090635	0.539759036144578
1	87629581	87632455	2874	87631018	5.91666666666667	11.1458333333333	5.91666666666667	8.91666666666667	5.91666666666667	7.625	0.663551401869159	0.530841121495327
1	87635883	87812473	176590	87724178	5.10416666666667	8.74305555555556	5.10416666666667	9.88194444444445	5.10416666666667	7.0625	0.516514406184118	0.583796664019063
1	87865324	87941030	75706	87903177	4.625	12.7708333333333	4.625	11.3888888888889	4.625	11.9166666666667	0.40609756097561	0.362153344208809
1	87941182	88018585	77403	87979883.5	2.16666666666667	10.9513888888889	2.16666666666667	7.16666666666667	2.16666666666667	9.85416666666667	0.302325581395349	0.197844007609385
1	88018762	88218068	199306	88118415	5.875	16.1458333333333	5.875	11.1527777777778	5.875	15.2083333333333	0.526774595267746	0.363870967741936
1	88218118	88397364	179246	88307741	8.41666666666666	26.1527777777778	8.41666666666666	11.2361111111111	8.41666666666666	25.6875	0.749072929542645	0.321826872012745
1	88397827	88528171	130344	88462999	1.10416666666667	6.65972222222222	1.10416666666667	8.34027777777778	1.10416666666667	5.8125	0.132389675270608	0.165797705943692
1	88528196	88623743	95547	88575969.5	0.208333333333332	12.6736111111111	0.208333333333332	7.55555555555556	0.208333333333332	12.25	0.0275735294117646	0.0164383561643835
1	88899124	88900577	1453	88899850.5	0.604166666666667	6.875	0.604166666666667	12.3611111111111	0.604166666666667	4.41666666666667	0.048876404494382	0.0878787878787878
1	88900592	88907946	7354	88904269	2.125	8.61805555555556	2.125	12.7083333333333	2.125	4	0.167213114754098	0.246575342465753
1	88907955	89052981	145026	88980468	7.04166666666667	21.25	7.04166666666667	19.3888888888889	7.04166666666667	17.8541666666667	0.363180515759312	0.331372549019608
1	89052988	89086965	33977	89069976.5	1.33333333333334	7.45833333333333	1.33333333333334	9.13194444444445	1.33333333333334	5.35416666666667	0.146007604562738	0.178770949720671
1	89086966	89234478	147512	89160722	2.625	9.18055555555556	2.625	8.29861111111111	2.625	6.85416666666667	0.316317991631799	0.285930408472012
1	89234754	89449105	214351	89341929.5	0.374999999999999	9.79166666666667	0.374999999999999	9.47222222222222	0.374999999999999	7.625	0.0395894428152492	0.0382978723404254
1	89452794	90014495	561701	89733644.5	1.6875	12.75	1.6875	10.1736111111111	1.6875	12.1041666666667	0.165870307167235	0.132352941176471
1	90374125	90558613	184488	90466369	1.58333333333333	7.72916666666667	1.58333333333333	7.27777777777778	1.58333333333333	7.16666666666667	0.217557251908397	0.204851752021563
1	90560698	90693500	132802	90627099	1.625	8.38888888888889	1.625	8.48611111111111	1.625	7.02083333333333	0.191489361702128	0.193708609271523
1	90693609	90888511	194902	90791060	3.0625	15.3333333333333	3.0625	8.54861111111111	3.0625	14.7291666666667	0.358245329000812	0.199728260869565
1	91255494	91493357	237863	91374425.5	2.95833333333333	9.63888888888889	2.95833333333333	7.75	2.95833333333333	7.54166666666667	0.381720430107527	0.306916426512968
1	91495712	91496148	436	91495930	0.104166666666669	3.33333333333334	0.104166666666669	9.59722222222222	0.104166666666669	2.91666666666667	0.0108538350217079	0.0312500000000006
1	91496154	91497271	1117	91496712.5	3.08333333333333	4.6875	3.08333333333333	12.5798611111111	3.08333333333333	3.85416666666667	0.245100745238752	0.657777777777778
1	91502253	91763920	261667	91633086.5	2.45833333333333	8.15972222222222	2.45833333333333	10.9583333333333	2.45833333333333	6.47916666666667	0.224334600760456	0.301276595744681
1	91785612	91814769	29157	91800190.5	1.25	6.69444444444445	1.25	8.15277777777778	1.25	5.45833333333333	0.153321976149915	0.186721991701245
1	92210896	92252649	41753	92231772.5	0.0625000000000004	7.35416666666666	0.0625000000000004	11.8263888888889	0.0625000000000004	6.29166666666667	0.00528479154433356	0.00849858356940516
1	92252694	92669572	416878	92461133	2.08333333333333	12.3333333333333	2.08333333333333	13.2986111111111	2.08333333333333	10.1041666666667	0.156657963446475	0.168918918918919
1	92669583	92914906	245323	92792244.5	1.91666666666667	11.3472222222222	1.91666666666667	13.5833333333333	1.91666666666667	6.91666666666667	0.141104294478528	0.16891064871481
1	93057919	93059182	1263	93058550.5	2.8125	5.01388888888889	2.8125	9.19444444444444	2.8125	3.35416666666667	0.305891238670695	0.560941828254848
1	93059202	93062350	3148	93060776	5.04166666666667	10.6666666666667	5.04166666666667	12.8125	5.04166666666667	9.02083333333333	0.39349593495935	0.47265625
1	93062485	93107968	45483	93085226.5	2.72916666666667	12.9166666666667	2.72916666666667	13.1180555555556	2.72916666666667	10.2291666666667	0.208046585494971	0.211290322580645
1	94077816	94232912	155096	94155364	3.75	10.8541666666667	3.75	10.3194444444444	3.75	8.58333333333333	0.363391655450875	0.345489443378119
1	94266440	94435034	168594	94350737	1.04166666666667	9	1.04166666666667	9.17361111111111	1.04166666666667	6.27083333333333	0.113550340651022	0.115740740740741
1	94435042	94521558	86516	94478300	9.75	23.1805555555556	9.75	16.1111111111111	9.75	21.0416666666667	0.605172413793103	0.420611144397843
1	94521894	94580141	58247	94551017.5	5.41666666666667	20.1805555555556	5.41666666666667	14.6805555555556	5.41666666666667	20.1041666666667	0.368968779564806	0.268410185822436
1	94580464	94843933	263469	94712198.5	2.14583333333333	9.47916666666667	2.14583333333333	11.6597222222222	2.14583333333333	4.89583333333333	0.184038117927338	0.226373626373626
1	95143091	95565323	422232	95354207	0.229166666666666	8.36111111111111	0.229166666666666	7.83333333333334	0.229166666666666	6.875	0.0292553191489361	0.0274086378737541
1	95865309	95989256	123947	95927282.5	3.39583333333334	16.4583333333333	3.39583333333334	10.7222222222222	3.39583333333334	15.75	0.316709844559586	0.206329113924051
1	96131806	96324981	193175	96228393.5	2.60416666666667	9.45138888888889	2.60416666666667	12.9097222222222	2.60416666666667	5.79166666666667	0.201721355567509	0.275532696546657
1	96325001	96616977	291976	96470989	2.72916666666667	12.2777777777778	2.72916666666667	10.9097222222222	2.72916666666667	9.33333333333334	0.250159134309357	0.222285067873303
1	97514236	97864592	350356	97689414	0.583333333333333	8.64583333333333	0.583333333333333	10.7638888888889	0.583333333333333	5.47916666666667	0.0541935483870968	0.0674698795180723
1	97864705	98110383	245678	97987544	2.58333333333334	12.1458333333333	2.58333333333334	15.625	2.58333333333334	10.125	0.165333333333333	0.212692967409949
1	98110494	98510562	400068	98310528	0.229166666666664	6.35416666666667	0.229166666666664	9.81944444444444	0.229166666666664	4.60416666666667	0.0233380480905231	0.0360655737704914
1	98510619	98864135	353516	98687377	1.25	10.9583333333333	1.25	10.2013888888889	1.25	10.0208333333333	0.122532334921715	0.114068441064639
1	100000162	100231142	230980	100115652	3.79166666666666	15.3333333333333	3.79166666666666	14.9722222222222	3.79166666666666	10.2291666666667	0.253246753246753	0.247282608695652
1	100344186	100378054	33868	100361120	3.14583333333333	13.6111111111111	3.14583333333333	6.48611111111111	3.14583333333333	12.3333333333333	0.485010706638116	0.231122448979592
1	100378059	100596785	218726	100487422	1.70833333333334	10.7083333333333	1.70833333333334	9.0625	1.70833333333334	9.77083333333333	0.188505747126437	0.159533073929961
1	100635168	100657302	22134	100646235	2.83333333333333	15.9861111111111	2.83333333333333	10.7326388888889	2.83333333333333	14.1666666666667	0.263992235522485	0.177237185056473
1	100657310	100916189	258879	100786749.5	5.22916666666667	24.0972222222222	5.22916666666667	10.3298611111111	5.22916666666667	23.5625	0.506218487394958	0.217002881844381
1	100917070	101243986	326916	101080528	5.41666666666667	23.3888888888889	5.41666666666667	11.3055555555556	5.41666666666667	23.25	0.479115479115479	0.231591448931116
1	101244182	101662580	418398	101453381	7.83333333333333	20.3055555555556	7.83333333333333	14.2361111111111	7.83333333333333	18.9375	0.550243902439024	0.385772913816689
1	101662583	101752144	89561	101707363.5	9.125	18.9166666666667	9.125	15.875	9.125	17.4791666666667	0.574803149606299	0.482378854625551
1	101752171	101995636	243465	101873903.5	1.875	13.5486111111111	1.875	14.6388888888889	1.875	12.3333333333333	0.128083491461101	0.138390568939006
1	101995841	102162349	166508	102079095	1.6875	6.9375	1.6875	10.2708333333333	1.6875	5.27083333333333	0.164300202839756	0.243243243243243
1	102457668	102540153	82485	102498910.5	1.91666666666667	8.02083333333333	1.91666666666667	10.6736111111111	1.91666666666667	6.22916666666667	0.179570592062459	0.238961038961039
1	102540505	102747232	206727	102643868.5	2.70833333333333	17.6111111111111	2.70833333333333	15.5277777777778	2.70833333333333	16.5625	0.174418604651163	0.153785488958991
1	102747366	102902782	155416	102825074	3.75	18.1666666666667	3.75	14.6180555555556	3.75	16.9166666666667	0.256532066508314	0.206422018348624
1	102937359	102943150	5791	102940254.5	0.375	2.90277777777778	0.375	7.45138888888889	0.375	0.833333333333333	0.0503261882572228	0.129186602870814
1	102943188	102955577	12389	102949382.5	2.91666666666667	14.3472222222222	2.91666666666667	12.8159722222222	2.91666666666667	12.875	0.227580601463018	0.203291384317522
1	102955710	103326643	370933	103141176.5	1	12.3194444444444	1	12.0138888888889	1	9.625	0.0832369942196532	0.0811724915445321
1	103388374	103402141	13767	103395257.5	2.41666666666666	5.82638888888888	2.41666666666666	9.55902777777778	2.41666666666666	5.02083333333333	0.252815110788231	0.414779499404052
1	103968718	104216974	248256	104092846	5.5	17.6944444444444	5.5	12.9444444444444	5.5	16.875	0.424892703862661	0.310832025117739
1	105206509	105469911	263402	105338210	1.5	11.1388888888889	1.5	10.4861111111111	1.5	10.625	0.143046357615894	0.134663341645885
1	105821272	105978696	157424	105899984	0.562500000000001	8.13194444444445	0.562500000000001	10.4097222222222	0.562500000000001	6.1875	0.0540360240160107	0.0691716481639625
1	105978712	106130035	151323	106054373.5	2.79166666666666	10.9375	2.79166666666666	13	2.79166666666666	7.89583333333333	0.21474358974359	0.255238095238095
1	106130139	106488898	358759	106309518.5	11.2083333333333	19.5069444444444	11.2083333333333	17.1805555555556	11.2083333333333	14.875	0.652384801940178	0.574581701673193
1	106488899	106533179	44280	106511039	13.4375	20.4236111111111	13.4375	19.2708333333333	13.4375	16.3333333333333	0.697297297297297	0.657939476368582
1	106533213	106905281	372068	106719247	6.45833333333333	14.4791666666667	6.45833333333333	15.5833333333333	6.45833333333333	12.25	0.414438502673797	0.446043165467626
1	106914621	107288304	373683	107101462.5	2.0625	14.1666666666667	2.0625	13.8888888888889	2.0625	13.8958333333333	0.1485	0.145588235294118
1	107312562	107326807	14245	107319684.5	0.104166666666667	7.27083333333333	0.104166666666667	9.00347222222222	0.104166666666667	5.5	0.0115696104897802	0.0143266475644699
1	107407743	107435938	28195	107421840.5	3.08333333333333	10.1388888888889	3.08333333333333	13.5972222222222	3.08333333333333	6.20833333333333	0.226762002042901	0.304109589041096
1	107435946	107439183	3237	107437564.5	6.58333333333333	14.6736111111111	6.58333333333333	17.1458333333333	6.58333333333333	12.875	0.383961117861482	0.448651206814955
1	107439341	107473700	34359	107456520.5	9.83333333333333	22.4861111111111	9.83333333333333	14.125	9.83333333333333	10.9166666666667	0.696165191740413	0.437306979617047
1	107473706	107712768	239062	107593237	6.52083333333333	12.1666666666667	6.52083333333333	12.6458333333333	6.52083333333333	11.4583333333333	0.515650741350906	0.535958904109589
1	107712798	108073096	360298	107892947	11.25	23.8125	11.25	16.1527777777778	11.25	15.75	0.696474634565778	0.47244094488189
1	108299786	108636087	336301	108467936.5	2.95833333333333	16.7777777777778	2.95833333333333	14.7569444444444	2.95833333333333	16.4166666666667	0.200470588235294	0.176324503311258
1	108756354	109124783	368429	108940568.5	1.0625	8.52083333333334	1.0625	8.36805555555556	1.0625	8.10416666666667	0.126970954356847	0.124694376528117
1	109634914	109820291	185377	109727602.5	3.3125	12.6319444444444	3.3125	11.0069444444444	3.3125	6.72916666666667	0.300946372239748	0.262231995601979
1	109820325	109897408	77083	109858866.5	4.04166666666667	12.4583333333333	4.04166666666667	13.7222222222222	4.04166666666667	7.41666666666667	0.294534412955466	0.324414715719063
1	109897421	110165445	268024	110031433	6.43749999999999	15.5555555555556	6.43749999999999	16.4930555555556	6.43749999999999	12.6041666666667	0.390315789473684	0.413839285714285
1	110263735	110542909	279174	110403322	6.75	15.6666666666667	6.75	11.8819444444444	6.75	10.6458333333333	0.568088836937463	0.430851063829787
1	110542911	110694575	151664	110618743	2.14583333333334	9.25694444444444	2.14583333333334	11.3819444444444	2.14583333333334	6.85416666666667	0.188529591214155	0.231807951987997
1	110694620	110914363	219743	110804491.5	2.33333333333333	9.63888888888889	2.33333333333333	8.28472222222222	2.33333333333333	8.58333333333333	0.281642917015926	0.24207492795389
1	110914401	111209460	295059	111061930.5	9.25	17.0625	9.25	14.6736111111111	9.25	14.0833333333333	0.630383341221013	0.542124542124542
1	111213251	111423686	210435	111318468.5	4.83333333333333	13.6388888888889	4.83333333333333	12.75	4.83333333333333	10.1666666666667	0.379084967320261	0.354378818737271
1	111663868	111916240	252372	111790054	0.874999999999999	4.36111111111111	0.874999999999999	9.73611111111111	0.874999999999999	3.85416666666667	0.0898716119828815	0.200636942675159
1	111916663	111926569	9906	111921616	3.64583333333333	8.61805555555556	3.64583333333333	12.5763888888889	3.64583333333333	8.6875	0.289895085588073	0.423045930701048
1	111926589	111996163	69574	111961376	0.958333333333331	6.84027777777778	0.958333333333331	9.15972222222222	0.958333333333331	5.79166666666667	0.104624715693707	0.140101522842639
1	111996698	112342089	345391	112169393.5	4.79166666666667	14.25	4.79166666666667	9.41666666666667	4.79166666666667	12.875	0.508849557522124	0.336257309941521
1	113174365	113545779	371414	113360072	1.08333333333334	17.7569444444444	1.08333333333334	13.4444444444444	1.08333333333334	14.625	0.0805785123966945	0.0610089949159173
1	113978140	114855352	877212	114416746	6.04166666666667	15.1944444444444	6.04166666666667	13.9305555555556	6.04166666666667	14.75	0.43369890329013	0.397623400365631
1	114938950	115076670	137720	115007810	3.02083333333333	9.81944444444444	3.02083333333333	10.9791666666667	3.02083333333333	8.875	0.275142314990512	0.307637906647808
1	115076686	115261955	185269	115169320.5	2.04166666666667	14.2638888888889	2.04166666666667	16.8472222222222	2.04166666666667	14.1041666666667	0.12118713932399	0.143135345666991
1	115307036	115415126	108090	115361081	1.79166666666667	12.7291666666667	1.79166666666667	17.4583333333333	1.79166666666667	12	0.102625298329356	0.14075286415712
1	115418943	116013639	594696	115716291	2.04166666666667	11.8541666666667	2.04166666666667	16.1458333333333	2.04166666666667	11.0208333333333	0.126451612903226	0.172231985940246
1	116013703	116067965	54262	116040834	13.4583333333333	18.1666666666667	13.4583333333333	18.7291666666667	13.4583333333333	18.1666666666667	0.718576195773081	0.740825688073394
1	116069138	116100616	31478	116084877	10.9375	15.25	10.9375	16.7708333333333	10.9375	14.75	0.652173913043478	0.717213114754098
1	116100657	116173205	72548	116136931	5.20833333333333	9.05555555555556	5.20833333333333	13.0763888888889	5.20833333333333	8.08333333333333	0.39830058417419	0.575153374233129
1	116173227	116391829	218602	116282528	3.85416666666667	12.1736111111111	3.85416666666667	15.4861111111111	3.85416666666667	10.6458333333333	0.248878923766816	0.316600114090131
1	117209106	117211052	1946	117210079	1.5	8.79861111111111	1.5	14.3402777777778	1.5	8.375	0.104600484261501	0.170481452249408
1	117711511	117773100	61589	117742305.5	0.979166666666667	5.29166666666667	0.979166666666667	8.78472222222222	0.979166666666667	4.39583333333334	0.111462450592885	0.18503937007874
1	118162879	118623543	460664	118393211	0.520833333333334	5.01388888888889	0.520833333333334	9.9375	0.520833333333334	4.25	0.0524109014675053	0.10387811634349
1	118624402	118884278	259876	118754340	2.25	4.84722222222222	2.25	8.22916666666667	2.25	4.39583333333333	0.273417721518988	0.464183381088826
1	118884286	118886097	1811	118885191.5	1.75	4.73611111111111	1.75	10.7916666666667	1.75	4.3125	0.162162162162162	0.36950146627566
1	118886105	119012721	126616	118949413	3.0625	8.17361111111111	3.0625	9.28472222222222	3.0625	7.72916666666667	0.329842931937173	0.374681393372982
1	119012750	119048293	35543	119030521.5	2.39583333333333	9.15277777777778	2.39583333333333	10.1180555555556	2.39583333333333	6.33333333333333	0.236787920384352	0.261760242792109
1	119048669	119148671	100002	119098670	1.77083333333333	5.52083333333334	1.77083333333333	6.88888888888889	1.77083333333333	4.5	0.257056451612903	0.320754716981132
1	119149046	119330605	181559	119239825.5	0.520833333333336	6.90972222222223	0.520833333333336	10.1180555555556	0.520833333333336	6.91666666666667	0.0514756348661636	0.0753768844221109
1	119330640	119331456	816	119331048	2.97916666666667	4.875	2.97916666666667	10.1527777777778	2.97916666666667	2.72916666666667	0.29343365253078	0.611111111111111
1	119331481	119342004	10523	119336742.5	6.70833333333333	11.625	6.70833333333333	13.5555555555556	6.70833333333333	10.75	0.494877049180328	0.577060931899642
1	119342034	119423244	81210	119382639	2.29166666666667	17.8611111111111	2.29166666666667	11.125	2.29166666666667	17.3541666666667	0.205992509363296	0.128304821150855
1	119423412	119437089	13677	119430250.5	0.749999999999997	9.56944444444445	0.749999999999997	7.61111111111111	0.749999999999997	9	0.098540145985401	0.078374455732946
1	119455745	119673208	217463	119564476.5	1.875	12.4791666666667	1.875	11.2083333333333	1.875	8.79166666666667	0.16728624535316	0.15025041736227
1	119673222	119697411	24189	119685316.5	0.895833333333332	13.4791666666667	0.895833333333332	11.6180555555556	0.895833333333332	12.0208333333333	0.077106993424985	0.0664605873261205
1	119697855	119806248	108393	119752051.5	4.72916666666667	24.9375	4.72916666666667	5.97916666666667	4.72916666666667	24.75	0.790940766550523	0.189640768588137
1	119806360	119905405	99045	119855882.5	7.66666666666668	40.7777777777778	7.66666666666668	8.50000000000001	7.66666666666668	40.5833333333333	0.901960784313726	0.188010899182562
1	119905431	120011230	105799	119958330.5	1.625	24.1875	1.625	12.4027777777778	1.625	24.0416666666667	0.131019036954088	0.0671834625322998
1	120011613	120102998	91385	120057305.5	0.541666666666667	12.0486111111111	0.541666666666667	16.2152777777778	0.541666666666667	11.5	0.0334047109207709	0.0449567723342939
1	120103010	120124503	21493	120113756.5	16.625	22.4722222222222	16.625	22.4791666666667	16.625	21.1458333333333	0.739573679332715	0.739802224969098
1	120124506	120162182	37676	120143344	13.2291666666667	20.1458333333333	13.2291666666667	20.6597222222222	13.2291666666667	17.2916666666667	0.640336134453781	0.656670113753878
1	120162188	120223372	61184	120192780	11.2916666666667	20.3472222222222	11.2916666666667	20.0555555555556	11.2916666666667	20.125	0.563019390581717	0.554948805460751
1	120223387	120225697	2310	120224542	6.60416666666667	15.6319444444444	6.60416666666667	16.7083333333333	6.60416666666667	14.2291666666667	0.395261845386534	0.422478898267437
1	120225699	120335918	110219	120280808.5	3.54166666666667	13.5763888888889	3.54166666666667	8.97222222222222	3.54166666666667	12.3541666666667	0.394736842105263	0.260869565217391
1	120337622	120486782	149160	120412202	8.91666666666666	17.4305555555556	8.91666666666666	11.3472222222222	8.91666666666666	15.7708333333333	0.785801713586291	0.511553784860558
1	120511378	120830148	318770	120670763	0.625000000000001	12.4097222222222	0.625000000000001	12.7916666666667	0.625000000000001	10.3125	0.0488599348534203	0.0503637381085619
1	120856460	120972895	116435	120914677.5	6.72916666666667	14.6111111111111	6.72916666666667	11.0347222222222	6.72916666666667	13.7291666666667	0.60981749528005	0.460551330798479
1	120973264	121477390	504126	121225327	11.7291666666667	20.6527777777778	11.7291666666667	17.8819444444444	11.7291666666667	20.125	0.655922330097087	0.567921990585071
1	121477478	121489164	11686	121483321	8.16666666666667	14.7777777777778	8.16666666666667	13.6666666666667	8.16666666666667	13.7083333333333	0.597560975609756	0.552631578947368
1	121489165	121502089	12924	121495627	4.58333333333334	9.01388888888889	4.58333333333334	10.7361111111111	4.58333333333334	6.625	0.426908150064683	0.508474576271187
1	121502104	121526283	24179	121514193.5	8.25000000000001	12.5277777777778	8.25000000000001	12.7777777777778	8.25000000000001	10.875	0.645652173913044	0.658536585365854
1	121526653	121564847	38194	121545750	6.83333333333334	11.5833333333333	6.83333333333334	12.0277777777778	6.83333333333334	9.41666666666667	0.568129330254042	0.589928057553958
1	121564876	121963001	398125	121763938.5	1.89583333333334	7.82638888888889	1.89583333333334	12.0486111111111	1.89583333333334	5.5	0.157348703170029	0.242236024844721
1	121984112	122169754	185642	122076933	16.1458333333333	27.9027777777778	16.1458333333333	23.8506944444444	16.1458333333333	25.5416666666667	0.676954432959674	0.578646092583375
1	122169776	122227505	57729	122198640.5	18.1041666666667	36.9166666666667	18.1041666666667	20.3125	18.1041666666667	36.9166666666667	0.891282051282051	0.490406320541761
1	122227530	122293907	66377	122260718.5	19.625	39.5833333333333	19.625	21.7222222222222	19.625	39.5833333333333	0.903452685421995	0.495789473684211
1	122293919	122423994	130075	122358956.5	8.04166666666667	20.5486111111111	8.04166666666667	9.98611111111112	8.04166666666667	19.7291666666667	0.80528511821975	0.39134842852315
1	122423995	122765523	341528	122594759	0.0416666666666654	6.52083333333333	0.0416666666666654	8.52777777777778	0.0416666666666654	5.25	0.00488599348534187	0.00638977635782728
1	122845731	123755731	910000	123300731	1.60416666666667	9.85416666666667	1.60416666666667	11.4236111111111	1.60416666666667	8.29166666666667	0.140425531914894	0.162790697674419
1	123755734	124046645	290911	123901189.5	3.875	7.74305555555555	3.875	9.17361111111111	3.875	6.66666666666666	0.422407267221801	0.500448430493273
1	124063189	124671582	608393	124367385.5	3.83333333333333	12.4444444444444	3.83333333333333	10.6666666666667	3.83333333333333	5.89583333333333	0.359375	0.308035714285714
1	124671646	124825545	153899	124748595.5	0.625	7.50694444444444	0.625	9.90972222222222	0.625	3.25	0.0630693763139453	0.0832562442183164
1	124825606	125383782	558176	125104694	0.9375	4.91666666666667	0.9375	8.87152777777778	0.9375	2	0.105675146771037	0.190677966101695
1	125383815	126414389	1030574	125899102	0.541666666666663	6.25694444444445	0.541666666666663	9.01388888888889	0.541666666666663	4.27083333333334	0.060092449922958	0.0865704772475022
1	126414781	126496523	81742	126455652	0.125	4.84027777777778	0.125	6.83333333333334	0.125	3.08333333333333	0.0182926829268293	0.0258249641319943
1	127381817	127573292	191475	127477554.5	0.791666666666662	15.9791666666667	0.791666666666662	20.0138888888889	0.791666666666662	15.9791666666667	0.0395558639833447	0.0495436766623205
1	128020231	129016144	995913	128518187.5	1.9375	9.29166666666667	1.9375	7.36111111111111	1.9375	8.14583333333333	0.263207547169811	0.208520179372197
1	132819720	134443859	1624139	133631789.5	2.85416666666667	9.63888888888889	2.85416666666667	8.57638888888889	2.85416666666667	8.6875	0.332793522267207	0.296109510086456
1	134630388	135629575	999187	135129981.5	1.04166666666667	6.52083333333333	1.04166666666667	6.54861111111111	1.04166666666667	5.8125	0.159066808059385	0.159744408945687
1	135629590	137634251	2004661	136631920.5	0.333333333333333	6.08333333333333	0.333333333333333	7.53125	0.333333333333333	5.02083333333333	0.0442600276625173	0.0547945205479452
1	139008530	139577994	569464	139293262	3.04166666666667	9.88194444444444	3.04166666666667	9.51388888888889	3.04166666666667	8.125	0.31970802919708	0.307800421644413
1	139578000	139941249	363249	139759624.5	2.20833333333333	10.2569444444444	2.20833333333333	12.1458333333333	2.20833333333333	9.85416666666667	0.181818181818182	0.215301286391334
1	139941312	140268189	326877	140104750.5	6.20833333333333	17.25	6.20833333333333	13.7916666666667	6.20833333333333	16.2083333333333	0.450151057401813	0.359903381642512
1	140268504	140524103	255599	140396303.5	6.77083333333333	18.8819444444444	6.77083333333333	14.9652777777778	6.77083333333333	16.0208333333333	0.452436194895592	0.358587716072085
1	140524104	140773375	249271	140648739.5	2.375	7.72916666666667	2.375	12.1388888888889	2.375	6.75	0.195652173913044	0.307277628032345
1	140773387	140970270	196883	140871828.5	0.937500000000001	6.79166666666667	0.937500000000001	7.45833333333333	0.937500000000001	6.0625	0.125698324022347	0.138036809815951
1	141088663	141274088	185425	141181375.5	3.45833333333333	12.5069444444444	3.45833333333333	12.875	3.45833333333333	7.47916666666667	0.268608414239482	0.276513048306496
1	141274275	141285394	11119	141279834.5	3.64583333333333	6.25	3.64583333333333	12.4375	3.64583333333333	6.25	0.293132328308208	0.583333333333333
1	141289399	141430873	141474	141360136	3.16666666666667	7.50694444444445	3.16666666666667	9.27777777777778	3.16666666666667	6.70833333333334	0.341317365269461	0.421831637372803
1	141750026	141842183	92157	141796104.5	5.54166666666667	16.8333333333333	5.54166666666667	12.9583333333333	5.54166666666667	16.4375	0.427652733118971	0.329207920792079
1	141842398	142092527	250129	141967462.5	5.35416666666667	11.4375	5.35416666666667	11.3819444444444	5.35416666666667	10.6875	0.470408785845028	0.468123861566485
1	142092892	142604047	511155	142348469.5	2.04166666666667	8.99305555555556	2.04166666666667	10.6944444444444	2.04166666666667	8.64583333333333	0.190909090909091	0.227027027027027
1	142633452	142898699	265247	142766075.5	7.89583333333333	16.9583333333333	7.89583333333333	11.1041666666667	7.89583333333333	15.375	0.711069418386492	0.465601965601966
1	142899430	142909088	9658	142904259	1.33333333333333	5.70833333333334	1.33333333333333	9.63194444444444	1.33333333333333	5.04166666666667	0.138428262436914	0.233576642335766
1	142909116	143154184	245068	143031650	4.14583333333333	9.97222222222222	4.14583333333333	8.81250000000001	4.14583333333333	8.95833333333334	0.470449172576832	0.415738161559889
1	143154194	143281676	127482	143217935	1.02083333333334	7.4375	1.02083333333334	11.1944444444444	1.02083333333334	6.75	0.0911910669975188	0.137254901960785
1	143281678	143286433	4755	143284055.5	2.5	5.52777777777778	2.5	10.1319444444444	2.5	4.875	0.246744345442084	0.452261306532664
1	143286442	143323457	37015	143304949.5	3.9375	11.1805555555556	3.9375	11.3402777777778	3.9375	11.0625	0.347213717085119	0.352173913043479
1	143323564	143481528	157964	143402546	1.95833333333334	10	1.95833333333334	11.875	1.95833333333334	9.91666666666666	0.164912280701755	0.195833333333334
1	143481575	143504269	22694	143492922	1.77083333333333	8.83333333333333	1.77083333333333	9.66666666666666	1.77083333333333	8.54166666666667	0.183189655172414	0.200471698113208
1	144249022	144486688	237666	144367855	4.91666666666667	11.3333333333333	4.91666666666667	12.0902777777778	4.91666666666667	10.5416666666667	0.406662837449742	0.433823529411765
1	144487256	144580450	93194	144533853	1.33333333333333	5.97222222222222	1.33333333333333	10.1388888888889	1.33333333333333	4.9375	0.131506849315069	0.223255813953488
1	144580463	144686728	106265	144633595.5	0.312499999999998	8.88888888888889	0.312499999999998	9.91666666666667	0.312499999999998	8.4375	0.0315126050420166	0.0351562499999998
1	144687567	145296024	608457	144991795.5	0.770833333333332	8.875	0.770833333333332	11.9166666666667	0.770833333333332	8.20833333333333	0.0646853146853145	0.0868544600938965
1	145296174	145410922	114748	145353548	1.83333333333333	6.97916666666667	1.83333333333333	7.47222222222222	1.83333333333333	5.875	0.245353159851301	0.262686567164179
1	145411061	145635985	224924	145523523	7.3125	21.1597222222222	7.3125	11.7638888888889	7.3125	20.0625	0.621605667060212	0.345585822120118
1	145637539	145876928	239389	145757233.5	2.02083333333332	14.9027777777778	2.02083333333332	11.7430555555556	2.02083333333332	14.8541666666667	0.172087522176226	0.135601118359738
1	145877090	145917921	40831	145897505.5	4.375	12.7569444444444	4.375	8.43055555555556	4.375	12.2083333333333	0.518945634266886	0.342950462710942
1	145917924	145925569	7645	145921746.5	10.8333333333333	27.3333333333333	10.8333333333333	14.25	10.8333333333333	27.1875	0.760233918128655	0.396341463414634
1	145925787	146055655	129868	145990721	12.5416666666667	28.375	12.5416666666667	15.9305555555556	12.5416666666667	28.2083333333333	0.787271142109852	0.441997063142438
1	146124380	146195853	71473	146160116.5	14.1041666666667	32.1388888888889	14.1041666666667	17.1111111111111	14.1041666666667	31.75	0.82426948051948	0.438850475367329
1	146195888	146459749	263861	146327818.5	9.89583333333333	26.1666666666667	9.89583333333333	12.8819444444444	9.89583333333333	26.1666666666667	0.768194070080862	0.378184713375796
1	146459798	146755975	296177	146607886.5	6.47916666666666	19.6597222222222	6.47916666666666	10.0138888888889	6.47916666666666	18.75	0.647018030513176	0.329565524549629
1	146756065	146791132	35067	146773598.5	7.1875	21.7361111111111	7.1875	13.3541666666667	7.1875	21.125	0.538221528861155	0.330670926517572
1	146791244	147026973	235729	146909108.5	9.27083333333333	20.8194444444444	9.27083333333333	14.0347222222222	9.27083333333333	19.0833333333333	0.66056407718951	0.445296864576384
1	147245269	147357329	112060	147301299	8.89583333333333	13.8333333333333	8.89583333333333	13.2916666666667	8.89583333333333	10.9791666666667	0.669278996865204	0.643072289156627
1	147357355	147358129	774	147357742	3.3125	7.94444444444444	3.3125	9.47916666666667	3.3125	7.0625	0.34945054945055	0.416958041958042
1	147358130	147358698	568	147358414	0.833333333333333	3.83333333333333	0.833333333333333	7.5	0.833333333333333	2.77083333333333	0.111111111111111	0.217391304347826
1	147358720	147359465	745	147359092.5	4.04166666666667	7.03472222222222	4.04166666666667	7.11111111111111	4.04166666666667	4.77083333333333	0.568359375	0.574531095755183
1	147359543	147361070	1527	147360306.5	1.97916666666667	3.90972222222222	1.97916666666667	4.50694444444445	1.97916666666667	2.95833333333333	0.439137134052388	0.506216696269983
1	147361094	147362502	1408	147361798	6.125	8.1875	6.125	9.51388888888889	6.125	6.1875	0.643795620437956	0.748091603053435
1	147362520	147495675	133155	147429097.5	8.5625	15.3333333333333	8.5625	13.6736111111111	8.5625	9.54166666666667	0.626206196038598	0.558423913043478
1	147495678	147806220	310542	147650949	2.72916666666667	15.7916666666667	2.72916666666667	25.1805555555556	2.72916666666667	13.6875	0.10838389409818	0.172823218997362
1	147906586	148003020	96434	147954803	5.54166666666667	13.5486111111111	5.54166666666667	14.0763888888889	5.54166666666667	12.4583333333333	0.393685249136655	0.409021014864172
1	148003394	148154165	150771	148078779.5	1.70833333333334	10.875	1.70833333333334	13.7083333333333	1.70833333333334	10.3541666666667	0.124620060790274	0.157088122605364
1	148154210	148243356	89146	148198783	3.47916666666667	8.10416666666666	3.47916666666667	11.7708333333333	3.47916666666667	6.85416666666666	0.295575221238938	0.429305912596401
1	148243398	148247383	3985	148245390.5	3.3125	10.1111111111111	3.3125	14.5625	3.3125	8.64583333333333	0.227467811158798	0.32760989010989
1	148247401	148445632	198231	148346516.5	5.52083333333333	11.3055555555556	5.52083333333333	12.3819444444444	5.52083333333333	10.875	0.445877734155917	0.488329238329238
1	148576125	148697113	120988	148636619	3.3125	16.8541666666667	3.3125	12.5208333333333	3.3125	16.0208333333333	0.264559068219634	0.196538936959209
1	148697252	148736280	39028	148716766	2.95833333333333	14.3125	2.95833333333333	12.6597222222222	2.95833333333333	12.7916666666667	0.233680746023039	0.20669577874818
1	148766362	148767961	1599	148767161.5	4.10416666666666	14.8125	4.10416666666666	9.99305555555556	4.10416666666666	13.8333333333333	0.410701876302988	0.277074542897327
1	149124034	149176735	52701	149150384.5	4.41666666666667	9.47222222222222	4.41666666666667	8.64583333333334	4.41666666666667	8.3125	0.510843373493976	0.466275659824047
1	149289862	149406168	116306	149348015	2.14583333333333	9.34722222222222	2.14583333333333	13.8819444444444	2.14583333333333	6.625	0.154577288644322	0.229569093610698
1	149406221	149810734	404513	149608477.5	4.89583333333333	16.1180555555556	4.89583333333333	14.2361111111111	4.89583333333333	13.25	0.34390243902439	0.303748384317105
1	150192172	150196308	4136	150194240	2.58333333333333	12.2916666666667	2.58333333333333	9.625	2.58333333333333	10.8333333333333	0.268398268398268	0.210169491525424
1	150196312	150240137	43825	150218224.5	4.35416666666667	14.5555555555556	4.35416666666667	5.75	4.35416666666667	13.875	0.757246376811594	0.299141221374046
1	150240143	150378353	138210	150309248	2.64583333333333	15.5138888888889	2.64583333333333	13.1805555555556	2.64583333333333	14.9583333333333	0.200737618545838	0.170546105640107
1	150486006	150500022	14016	150493014	1.47916666666667	12.4722222222222	1.47916666666667	11.3819444444444	1.47916666666667	11.7291666666667	0.129957291031117	0.118596881959911
1	150500048	150682244	182196	150591146	9.8125	23.0069444444444	9.8125	16.3263888888889	9.8125	22.75	0.601020842194811	0.426501660126773
1	150683004	150781206	98202	150732105	3.60416666666667	15.8680555555556	3.60416666666667	13.8541666666667	3.60416666666667	15.2708333333333	0.26015037593985	0.227133479212254
1	150786185	151077778	291593	150931981.5	6.70833333333333	13.7152777777778	6.70833333333333	14.5763888888889	6.70833333333333	11.3541666666667	0.460219151977132	0.489113924050633
1	151077796	151265095	187299	151171445.5	0.208333333333329	11.1458333333333	0.208333333333329	15.8472222222222	0.208333333333329	7.72916666666667	0.0131463628396141	0.0186915887850463
1	151269127	151367563	98436	151318345	4.41666666666667	11.0138888888889	4.41666666666667	18.3611111111111	4.41666666666667	7.70833333333333	0.240544629349471	0.401008827238336
1	151389433	151711833	322400	151550633	5.5625	12.5972222222222	5.5625	10.8055555555556	5.5625	11.6458333333333	0.514781491002571	0.441565600882029
1	151711837	151987276	275439	151849556.5	3.77083333333333	14.3680555555556	3.77083333333333	11.1875	3.77083333333333	13.6875	0.337057728119181	0.262445625906235
1	152519907	152520833	926	152520370	1.6875	3.92361111111111	1.6875	8.47916666666667	1.6875	1.91666666666667	0.199017199017199	0.430088495575221
1	152872899	152924549	51650	152898724	1.79166666666667	10.0833333333333	1.79166666666667	15.3888888888889	1.79166666666667	6.70833333333333	0.116425992779783	0.177685950413223
1	152924573	153254503	329930	153089538	1.16666666666667	8.96527777777778	1.16666666666667	14.375	1.16666666666667	7	0.0811594202898551	0.130131680867545
1	153254514	153269500	14986	153262007	6.125	14	6.125	15.1041666666667	6.125	8.52083333333333	0.40551724137931	0.4375
1	153269511	153330938	61427	153300224.5	4.39583333333333	15.25	4.39583333333333	7.89583333333334	4.39583333333333	12.625	0.556728232189973	0.288251366120219
1	153331066	153334632	3566	153332849	0.1875	6.36111111111111	0.1875	5.65277777777778	0.1875	4.6875	0.0331695331695332	0.0294759825327511
1	153334644	153376129	41485	153355386.5	3.3125	13.9791666666667	3.3125	8.14583333333334	3.3125	11.9791666666667	0.406649616368286	0.236959761549925
1	153376162	153590848	214686	153483505	2.66666666666667	8.77777777777778	2.66666666666667	5.63194444444444	2.66666666666667	7.35416666666667	0.473489519112207	0.30379746835443
1	153590878	153745949	155071	153668413.5	4.45833333333333	16.7013888888889	4.45833333333333	4.95833333333333	4.45833333333333	16.4791666666667	0.899159663865546	0.266943866943867
1	153746188	154094162	347974	153920175	3.8125	14.3611111111111	3.8125	7.59027777777778	3.8125	13.8125	0.502287282708143	0.265473887814313
1	154094170	154332932	238762	154213551	0.5	11.1111111111111	0.5	8.34722222222222	0.5	10.1041666666667	0.0599001663893511	0.045
1	155204189	155366655	162466	155285422	12.5	23.6736111111111	12.5	21.3611111111111	12.5	22.4791666666667	0.5851755526658	0.528014080375477
1	155695696	155986909	291213	155841302.5	3.72916666666667	20	3.72916666666667	13.3680555555556	3.72916666666667	19.1041666666667	0.278961038961039	0.186458333333333
1	155987311	156104051	116740	156045681	3.45833333333333	8.13888888888889	3.45833333333333	13.1805555555556	3.45833333333333	7.5	0.262381454162276	0.424914675767918
1	156104210	156215038	110828	156159624	1.62499999999999	9.74305555555556	1.62499999999999	12.125	1.62499999999999	8.3125	0.1340206185567	0.166785459729151
1	156385905	156387016	1111	156386460.5	0.208333333333334	4.08333333333333	0.208333333333334	8.68055555555555	0.208333333333334	2.1875	0.0240000000000001	0.0510204081632656
1	156546601	157071983	525382	156809292	1.5	11.5763888888889	1.5	11.9722222222222	1.5	10.3541666666667	0.125290023201856	0.129574085182963
1	157146166	157190803	44637	157168484.5	2.1875	5.79166666666667	2.1875	13.1180555555556	2.1875	5.0625	0.166754896770778	0.377697841726618
1	157190818	157246636	55818	157218727	1.91666666666667	4.67361111111111	1.91666666666667	7.39583333333333	1.91666666666667	3.5625	0.259154929577465	0.410104011887073
1	157246685	157521585	274900	157384135	6.97916666666667	12.375	6.97916666666667	13.0625	6.97916666666667	7.91666666666667	0.534290271132376	0.563973063973064
1	157522298	157928837	406539	157725567.5	3.91666666666667	15.4513888888889	3.91666666666667	20.5972222222222	3.91666666666667	14.7916666666667	0.190155091031693	0.253483146067416
1	157985597	158271343	285746	158128470	4.70833333333334	15.2847222222222	4.70833333333334	16.5416666666667	4.70833333333334	13.9375	0.28463476070529	0.30804179918219
1	158497044	158647333	150289	158572188.5	2.6875	15.0347222222222	2.6875	12.3402777777778	2.6875	14.4791666666667	0.217782779966235	0.178752886836028
1	158647339	158704000	56661	158675669.5	0.0624999999999987	6.28472222222222	0.0624999999999987	9.97569444444445	0.0624999999999987	6.08333333333333	0.00626522798468487	0.00994475138121527
1	158796751	159466358	669607	159131554.5	0.187499999999999	13.2638888888889	0.187499999999999	8.39583333333334	0.187499999999999	12.3333333333333	0.0223325062034738	0.0141361256544502
1	159475902	159797444	321542	159636673	0.479166666666667	7.39583333333333	0.479166666666667	10.3958333333333	0.479166666666667	6.35416666666667	0.0460921843687375	0.0647887323943662
1	159797476	159918008	120532	159857742	2.125	5.14583333333334	2.125	9.23611111111111	2.125	4.5625	0.230075187969925	0.412955465587044
1	160030970	160153921	122951	160092445.5	1.9375	7.24305555555556	1.9375	10.2638888888889	1.9375	6.875	0.188768606224628	0.267497603068073
1	160153923	160258005	104082	160205964	1.625	6.125	1.625	9.38888888888889	1.625	5.4375	0.173076923076923	0.26530612244898
1	160695774	160745596	49822	160720685	5.375	18.9375	5.375	15.5138888888889	5.375	18.7291666666667	0.346463742166517	0.283828382838284
1	160745653	160932456	186803	160839054.5	2.04166666666667	11.9583333333333	2.04166666666667	8.49305555555556	2.04166666666667	11.5416666666667	0.240392477514309	0.170731707317073
1	160932461	161040985	108524	160986723	2.08333333333333	19.0902777777778	2.08333333333333	14.2222222222222	2.08333333333333	17.1458333333333	0.146484375	0.109130592942888
1	161041068	161481710	440642	161261389	3.52083333333333	21.4375	3.52083333333333	12.3402777777778	3.52083333333333	21.4375	0.285312324141812	0.164237123420797
1	161481749	161556037	74288	161518893	4.45833333333333	12.9791666666667	4.45833333333333	9.76388888888889	4.45833333333333	12.7291666666667	0.456614509246088	0.343499197431782
1	161624691	161927567	302876	161776129	1.16666666666667	11.1597222222222	1.16666666666667	10.625	1.16666666666667	10.9583333333333	0.109803921568627	0.104542626011201
1	162273615	162280529	6914	162277072	0.770833333333334	8.97916666666667	0.770833333333334	9.83333333333333	0.770833333333334	7.45833333333333	0.0783898305084746	0.08584686774942
1	162280545	162371502	90957	162326023.5	1.83333333333333	12.9305555555556	1.83333333333333	6.93055555555556	1.83333333333333	12.6458333333333	0.264529058116232	0.141783029001074
1	162371504	162426491	54987	162398997.5	0.729166666666667	7.95833333333333	0.729166666666667	7.29513888888889	0.729166666666667	7.3125	0.0999524036173251	0.0916230366492147
1	162553238	162554810	1572	162554024	0.75	6.0138888888889	0.75	9.73611111111111	0.75	5.37500000000001	0.0770328102710414	0.124711316397229
1	163394531	163440761	46230	163417646	1.9375	12.6041666666667	1.9375	13.3402777777778	1.9375	11.8541666666667	0.145236855804268	0.153719008264463
1	164656309	164964696	308387	164810502.5	0.16666666666667	16.8819444444444	0.16666666666667	10.7222222222222	0.16666666666667	16.2916666666667	0.0155440414507775	0.00987248046071592
1	165101099	165424265	323166	165262682	6.47916666666667	15.3680555555556	6.47916666666667	16.3958333333333	6.47916666666667	14.3125	0.395171537484117	0.421599638499774
1	165424277	165425513	1236	165424895	5.625	6.95833333333333	5.625	12.7916666666667	5.625	6.02083333333333	0.439739413680782	0.808383233532934
1	165425530	165642616	217086	165534073	6.47916666666667	10.9652777777778	6.47916666666667	12.2638888888889	6.47916666666667	8.1875	0.528312570781427	0.590880303989867
1	165642665	166039462	396797	165841063.5	1.54166666666667	6.79166666666667	1.54166666666667	8.68055555555556	1.54166666666667	5	0.1776	0.226993865030675
1	166335269	166482359	147090	166408814	2.77083333333333	14.4166666666667	2.77083333333333	12.4236111111111	2.77083333333333	13.3125	0.2230296254891	0.192196531791908
1	166735321	166827380	92059	166781350.5	3.10416666666667	11.3541666666667	3.10416666666667	10.2152777777778	3.10416666666667	9.29166666666667	0.303874915023793	0.273394495412844
1	167019907	167231914	212007	167125910.5	7.97916666666667	24.1458333333333	7.97916666666667	17.8680555555556	7.97916666666667	20.3125	0.446560435289545	0.330457290767903
1	167786766	167975701	188935	167881233.5	2.375	5.74305555555556	2.375	7.90277777777778	2.375	4.6875	0.300527240773286	0.41354292623942
1	167976003	168275446	299443	168125724.5	4.89583333333334	12.8611111111111	4.89583333333334	11.1875	4.89583333333334	9.47916666666667	0.437616387337058	0.380669546436285
1	168275448	168484924	209476	168380186	9.29166666666667	15.3680555555556	9.29166666666667	13.9791666666667	9.29166666666667	9.97916666666667	0.664679582712369	0.604609127880705
1	170019316	170206124	186808	170112720	4.91666666666667	15.2222222222222	4.91666666666667	6.69444444444444	4.91666666666667	14.3333333333333	0.734439834024896	0.322992700729927
1	170206128	170312566	106438	170259347	9.66666666666667	16.9652777777778	9.66666666666667	12.4305555555556	9.66666666666667	13.625	0.777653631284916	0.569791240278347
1	170323899	170369049	45150	170346474	19	23.5	19	20.5833333333333	19	23.5	0.923076923076923	0.808510638297872
1	170369106	170494536	125430	170431821	6.33333333333333	10.2986111111111	6.33333333333333	12.9166666666667	6.33333333333333	8.10416666666667	0.490322580645161	0.614969656102495
1	170494870	170595651	100781	170545260.5	0.562500000000004	12.3611111111111	0.562500000000004	13.7916666666667	0.562500000000004	10.6041666666667	0.0407854984894263	0.0455056179775284
1	170981704	171080318	98614	171031011	5.29166666666667	10.4305555555556	5.29166666666667	12.5	5.29166666666667	5.20833333333333	0.423333333333333	0.507323568575233
1	171080386	171081778	1392	171081082	1.79166666666667	3.625	1.79166666666667	12.0972222222222	1.79166666666667	3.22916666666667	0.148105625717566	0.494252873563219
1	171081782	171253335	171553	171167558.5	6.97916666666666	22.2847222222222	6.97916666666666	12.3125	6.97916666666666	21.4375	0.566835871404399	0.313181676534746
1	171253407	171285714	32307	171269560.5	4.875	14.0972222222222	4.875	8.38888888888889	4.875	12.875	0.58112582781457	0.345812807881773
1	171285738	171286951	1213	171286344.5	0.166666666666666	3.5	0.166666666666666	9.23611111111111	0.166666666666666	0.416666666666666	0.0180451127819548	0.0476190476190473
1	171286953	171287795	842	171287374	0.500000000000001	4.48611111111111	0.500000000000001	10.6666666666667	0.500000000000001	2.89583333333333	0.0468750000000001	0.111455108359133
1	171287908	171290489	2581	171289198.5	1.85416666666667	5.47916666666667	1.85416666666667	10.3819444444444	1.85416666666667	3.875	0.178595317725753	0.338403041825095
1	171290496	171292778	2282	171291637	1.5	7.61805555555556	1.5	7.36111111111111	1.5	6.70833333333334	0.203773584905661	0.19690063810392
1	171292797	171293634	837	171293215.5	0.8125	3.9375	0.8125	7.90277777777778	0.8125	2.20833333333333	0.102811950790861	0.206349206349206
1	171293635	171294612	977	171294123.5	1.875	5.61111111111112	1.875	8.06944444444444	1.875	4.5	0.232358003442341	0.334158415841584
1	171294623	171298295	3672	171296459	1.8125	9.65972222222222	1.8125	7.34722222222222	1.8125	8.45833333333333	0.246691871455577	0.187634795111431
1	172300859	172837263	536404	172569061	1.5	11.1736111111111	1.5	9.97222222222222	1.5	9.72916666666667	0.15041782729805	0.134244872591672
1	172837278	173061178	223900	172949228	3.25	14.0208333333333	3.25	12.1527777777778	3.25	13.125	0.267428571428572	0.231797919762259
1	173061248	173162490	101242	173111869	4.1875	8.88194444444444	4.1875	10.7395833333333	4.1875	7.8125	0.389912706110572	0.471462079749805
1	173162704	173232871	70167	173197787.5	2.64583333333334	11.7986111111111	2.64583333333334	11.46875	2.64583333333334	11.75	0.230699364214351	0.224249558563861
1	173232958	173250056	17098	173241507	2.125	11.4513888888889	2.125	14.2361111111111	2.125	11.0625	0.149268292682927	0.185567010309278
1	174010203	174246633	236430	174128418	2.41666666666667	10.875	2.41666666666667	11.2048611111111	2.41666666666667	10.2083333333333	0.215680198326619	0.222222222222222
1	174246636	174399005	152369	174322820.5	1.08333333333333	11.1944444444444	1.08333333333333	12.5277777777778	1.08333333333333	11.0625	0.0864745011086473	0.096774193548387
1	174399008	174592376	193368	174495692	0.333333333333335	6.61111111111111	0.333333333333335	12.1944444444444	0.333333333333335	6.35416666666667	0.0273348519362189	0.0504201680672272
1	174592491	174672363	79872	174632427	9.125	20.4097222222222	9.125	14.0972222222222	9.125	16.5208333333333	0.647290640394089	0.447090847226948
1	174672386	174876603	204217	174774494.5	5.5	10.9652777777778	5.5	14.4652777777778	5.5	7.60416666666667	0.380220835333653	0.501583280557315
1	175324640	175594706	270066	175459673	0.291666666666668	14.1944444444444	0.291666666666668	9.23611111111112	0.291666666666668	13.1666666666667	0.0315789473684212	0.0205479452054795
1	175853203	175920873	67670	175887038	1.47916666666667	6.36111111111111	1.47916666666667	8.95138888888889	1.47916666666667	6.1875	0.165244375484872	0.232532751091703
1	175920894	176077470	156576	175999182	1.5625	4.84027777777778	1.5625	8.63888888888889	1.5625	3.35416666666667	0.180868167202572	0.322812051649928
1	176088856	176123096	34240	176105976	0.416666666666668	13.5972222222222	0.416666666666668	13.4097222222222	0.416666666666668	12.375	0.0310719834282756	0.0306435137895813
1	176785397	176891866	106469	176838631.5	1.25	12.875	1.25	14.5833333333333	1.25	12.7083333333333	0.0857142857142856	0.0970873786407766
1	176891895	176970459	78564	176931177	1.47916666666666	14.8541666666667	1.47916666666666	13.3055555555556	1.47916666666666	13.7291666666667	0.111169102296451	0.099579242636746
1	177577068	177637846	60778	177607457	1.875	7.48611111111111	1.875	13.8611111111111	1.875	5.60416666666667	0.135270541082164	0.250463821892394
1	177637885	177751089	113204	177694487	4.77083333333334	12.3055555555556	4.77083333333334	15.875	4.77083333333334	12.2083333333333	0.300524934383202	0.387697516930023
1	177751091	178040306	289215	177895698.5	4.20833333333333	11.3402777777778	4.20833333333333	9.27777777777778	4.20833333333333	9.66666666666667	0.453592814371258	0.37109614206981
1	178040315	178315519	275204	178177917	2.02083333333333	8.93055555555556	2.02083333333333	11.2083333333333	2.02083333333333	6.52083333333333	0.180297397769517	0.226283048211509
1	178317306	178401294	83988	178359300	2.4375	8.70833333333334	2.4375	11.5277777777778	2.4375	7.85416666666667	0.21144578313253	0.279904306220096
1	178419703	178541840	122137	178480771.5	0.5	11.7291666666667	0.5	10.7222222222222	0.5	11.375	0.0466321243523316	0.0426287744227354
1	178541852	178775760	233908	178658806	2.85416666666667	7.26388888888889	2.85416666666667	9.68055555555556	2.85416666666667	5.75	0.294835007173601	0.392925430210325
1	178776090	179369070	592980	179072580	6.60416666666667	12.8819444444444	6.60416666666667	13.1527777777778	6.60416666666667	11.8541666666667	0.502111932418163	0.51266846361186
1	179369078	179620745	251667	179494911.5	1.58333333333333	15.125	1.58333333333333	13.6666666666667	1.58333333333333	14.5416666666667	0.115853658536585	0.104683195592286
1	179620950	179987535	366585	179804242.5	1.66666666666667	13.8611111111111	1.66666666666667	9.47222222222222	1.66666666666667	13.4166666666667	0.175953079178886	0.120240480961924
1	179989756	180041051	51295	180015403.5	0.541666666666667	12.7916666666667	0.541666666666667	12.1388888888889	0.541666666666667	12.2916666666667	0.0446224256292907	0.0423452768729642
1	180430658	180629246	198588	180529952	2.35416666666667	7.84027777777778	2.35416666666667	11.4791666666667	2.35416666666667	6.25	0.20508166969147	0.300265721877768
1	180629247	180630424	1177	180629835.5	0.0833333333333328	3.79861111111111	0.0833333333333328	9.36805555555556	0.0833333333333328	2.70833333333333	0.00889547813194954	0.0219378427787933
1	180630431	180717130	86699	180673780.5	0.541666666666668	6.60416666666667	0.541666666666668	12.0208333333333	0.541666666666668	6.10416666666667	0.0450606585788562	0.0820189274447951
1	180970043	181529668	559625	181249855.5	2.20833333333334	17.9027777777778	2.20833333333334	10.0138888888889	2.20833333333334	17.6875	0.220527045769765	0.123351435221102
1	181530420	181891971	361551	181711195.5	1.1875	12.0277777777778	1.1875	9.88888888888889	1.1875	11.7291666666667	0.120084269662922	0.0987297921478062
1	181909731	182054652	144921	181982191.5	2.3125	9.19444444444445	2.3125	10.6458333333333	2.3125	6.47916666666667	0.217221135029354	0.251510574018127
1	182563485	182873474	309989	182718479.5	0.083333333333336	12.7291666666667	0.083333333333336	13.4166666666667	0.083333333333336	10.7083333333333	0.0062111801242238	0.00654664484451739
1	182932601	183107988	175387	183020294.5	1.52083333333333	8.26388888888889	1.52083333333333	10.7569444444444	1.52083333333333	7.0625	0.141381536475145	0.184033613445378
1	183107989	183477156	369167	183292572.5	1.0625	10.0555555555556	1.0625	8.75	1.0625	7.3125	0.121428571428572	0.105662983425414
1	184035741	184601494	565753	184318617.5	2.72916666666667	9.84027777777778	2.72916666666667	8.95486111111111	2.72916666666667	7.9375	0.304769290422644	0.277346506704305
1	184654274	184940845	286571	184797559.5	3	9.69444444444444	3	10.9583333333333	3	8.85416666666667	0.273764258555133	0.30945558739255
1	185336862	186768110	1431248	186052486	1.95833333333333	10.4305555555556	1.95833333333333	12.2013888888889	1.95833333333333	6.89583333333333	0.160500853727945	0.187749667110519
1	187149738	187230502	80764	187190120	2.125	7.06944444444445	2.125	8.38888888888889	2.125	3.91666666666667	0.253311258278146	0.300589390962672
1	187230529	187235494	4965	187233011.5	5.35416666666667	10.3611111111111	5.35416666666667	10.1041666666667	5.35416666666667	7.12500000000001	0.529896907216495	0.516756032171582
1	187235537	187238133	2596	187236835	1.75	10.5555555555556	1.75	9.36111111111111	1.75	2.83333333333333	0.186943620178042	0.16578947368421
1	187238178	187276905	38727	187257541.5	2.70833333333333	12.8055555555556	2.70833333333333	8.15277777777778	2.70833333333333	5.77083333333333	0.332197614991482	0.211496746203904
1	187278173	187423866	145693	187351019.5	2.125	14.2569444444444	2.125	16.9583333333333	2.125	12.8958333333333	0.125307125307125	0.149050170482221
1	187423981	187661909	237928	187542945	3.16666666666667	9.13194444444444	3.16666666666667	12.1805555555556	3.16666666666667	6.39583333333334	0.259977194982896	0.346768060836502
1	187661932	187915697	253765	187788814.5	2.27083333333333	12.4722222222222	2.27083333333333	11.8472222222222	2.27083333333333	11.25	0.191676436107855	0.182071269487751
1	188098849	188120121	21272	188109485	0.708333333333333	3.75	0.708333333333333	8.23611111111111	0.708333333333333	3.125	0.0860033726812815	0.188888888888889
1	188121571	188753189	631618	188437380	1.70833333333333	11.4097222222222	1.70833333333333	12.1944444444444	1.70833333333333	9.625	0.140091116173121	0.149726110772976
1	188753355	188964928	211573	188859141.5	2.02083333333333	10.7361111111111	2.02083333333333	10.2083333333333	2.02083333333333	9.70833333333334	0.197959183673469	0.188227684346701
1	189846369	190464020	617651	190155194.5	0.270833333333334	6.72916666666667	0.270833333333334	9.25694444444445	0.270833333333334	5.89583333333333	0.0292573143285823	0.040247678018576
1	190464061	190587109	123048	190525585	2.16666666666667	9.00694444444444	2.16666666666667	12.8055555555556	2.16666666666667	7.6875	0.169197396963124	0.240555127216654
1	190587184	190792005	204821	190689594.5	0.833333333333333	13.2569444444444	0.833333333333333	14.6111111111111	0.833333333333333	10.375	0.0570342205323194	0.0628601361969617
1	191233122	191235788	2666	191234455	2.29166666666667	4.0625	2.29166666666667	5.66666666666667	2.29166666666667	2.79166666666667	0.404411764705883	0.564102564102564
1	191888830	192168781	279951	192028805.5	2.625	15.2361111111111	2.625	11.5972222222222	2.625	14.8958333333333	0.226347305389222	0.17228805834093
1	192169114	192928060	758946	192548587	4.3125	13.7638888888889	4.3125	11.0069444444444	4.3125	12.8333333333333	0.39179810725552	0.313319878910192
1	192965424	193351180	385756	193158302	1.04166666666666	12.9375	1.04166666666666	14.375	1.04166666666666	10.6666666666667	0.0724637681159418	0.080515297906602
1	193555338	193826074	270736	193690706	1.9375	10.3125	1.9375	12.4166666666667	1.9375	5.10416666666667	0.156040268456376	0.187878787878788
1	193906569	194183687	277118	194045128	0.97916666666667	9.02083333333333	0.97916666666667	10.6041666666667	0.97916666666667	8.4375	0.0923379174852655	0.108545034642033
1	194183788	194431584	247796	194307686	1.77083333333333	8.52083333333334	1.77083333333333	9.22916666666667	1.77083333333333	6.41666666666667	0.191873589164786	0.207823960880196
1	194431586	194472558	40972	194452072	1.625	7.59027777777778	1.625	8.88888888888889	1.625	5.70833333333333	0.1828125	0.214089661482159
1	194472577	194592585	120008	194532581	1.69309011255336e-15	8	1.69309011255336e-15	10.375	1.69309011255336e-15	5.35416666666667	1.63189408438878e-16	2.1163626406917e-16
1	194796145	194967612	171467	194881878.5	2.14583333333333	15.0208333333333	2.14583333333333	13.2708333333333	2.14583333333333	12.7083333333333	0.161695447409733	0.142857142857143
1	194972562	195314231	341669	195143396.5	1.04166666666667	11.0416666666667	1.04166666666667	11.9027777777778	1.04166666666667	8.58333333333333	0.0875145857642942	0.0943396226415096
1	195517756	195791935	274179	195654845.5	5.08333333333333	14.7013888888889	5.08333333333333	11.2777777777778	5.08333333333333	8.75	0.450738916256157	0.345772319319792
1	195812086	195946923	134837	195879504.5	3.20833333333333	21.9444444444444	3.20833333333333	13.4236111111111	3.20833333333333	21.1666666666667	0.239006725297465	0.146202531645569
1	195946981	196159410	212429	196053195.5	6.91666666666666	24.7291666666667	6.91666666666666	13.1666666666667	6.91666666666666	24.2083333333333	0.525316455696202	0.279696714406065
1	196285178	196467193	182015	196376185.5	3.20833333333334	16.4791666666667	3.20833333333334	10.75	3.20833333333334	14.9583333333333	0.298449612403101	0.194690265486726
1	196473331	196672950	199619	196573140.5	2.5625	9.68055555555556	2.5625	9.15972222222222	2.5625	7.91666666666667	0.279757391963609	0.264705882352941
1	196673416	196727785	54369	196700600.5	1.14583333333333	8.79861111111111	1.14583333333333	9.32638888888889	1.14583333333333	7.95833333333334	0.122859270290395	0.130228887134965
1	196728162	196918681	190519	196823421.5	8.95833333333333	26.9861111111111	8.95833333333333	19.0277777777778	8.95833333333333	25.875	0.470802919708029	0.331960885229027
1	196918880	197111389	192509	197015134.5	4.54166666666667	15.3333333333333	4.54166666666667	14.4444444444444	4.54166666666667	13.8541666666667	0.314423076923077	0.296195652173913
1	197499236	197570216	70980	197534726	2.27083333333334	21.1597222222222	2.27083333333334	10.5486111111111	2.27083333333334	21.0625	0.215273206056616	0.107318674105678
1	197570650	197890632	319982	197730641	3.3125	12.1527777777778	3.3125	9.75	3.3125	8.70833333333334	0.33974358974359	0.272571428571429
1	197954003	198262871	308868	198108437	3.3125	11.2638888888889	3.3125	13.4583333333333	3.3125	9.47916666666667	0.246130030959752	0.294081381011097
1	199445950	199654589	208639	199550269.5	0.0416666666666684	12.7222222222222	0.0416666666666684	13.1527777777778	0.0416666666666684	8.33333333333333	0.00316789862724406	0.00327510917030581
1	199655873	199768631	112758	199712252	3.0625	20.9583333333333	3.0625	14.4791666666667	3.0625	16.8958333333333	0.211510791366907	0.146123260437376
1	199805048	200031815	226767	199918431.5	2.75	9.8125	2.75	12.3333333333333	2.75	6.625	0.222972972972973	0.280254777070064
1	200031831	200043013	11182	200037422	1.5625	6.01388888888889	1.5625	11.125	1.5625	5.02083333333333	0.140449438202247	0.259815242494226
1	200047156	200283844	236688	200165500	0.354166666666667	12.7986111111111	0.354166666666667	14.2569444444444	0.354166666666667	11.9375	0.0248416950803702	0.0276722734671731
1	200283891	200321784	37893	200302837.5	0.395833333333333	6.57638888888889	0.395833333333333	7.67361111111111	0.395833333333333	4.75	0.0515837104072397	0.0601900739176345
1	200321789	200517591	195802	200419690	4.54166666666667	11.6180555555556	4.54166666666667	10.9305555555556	4.54166666666667	8.27083333333334	0.415501905972046	0.390914524805738
1	201665502	201778862	113360	201722182	1.35416666666666	6.70138888888889	1.35416666666666	10.4583333333333	1.35416666666666	4.66666666666667	0.129482071713147	0.202072538860103
1	201778863	201908766	129903	201843814.5	0.270833333333333	8.4375	0.270833333333333	10.3680555555556	0.270833333333333	7.77083333333333	0.0261219022103147	0.0320987654320987
1	201909187	202031307	122120	201970247	5.22916666666667	11.5069444444444	5.22916666666667	14.4236111111111	5.22916666666667	10.8125	0.362542128069331	0.454435727217863
1	202031462	202082090	50628	202056776	11	20.4444444444444	11	19.3333333333333	11	17.4583333333333	0.568965517241379	0.538043478260869
1	202082102	202342957	260855	202212529.5	0.729166666666666	14.1458333333333	0.729166666666666	14.1111111111111	0.729166666666666	14.0208333333333	0.0516732283464566	0.0515463917525773
1	202343836	202478854	135018	202411345	2.02083333333333	11.7569444444444	2.02083333333333	11.0763888888889	2.02083333333333	10.5416666666667	0.182445141065831	0.171884229178972
1	202790997	202801040	10043	202796018.5	2.79166666666667	10.7083333333333	2.79166666666667	13.5277777777778	2.79166666666667	6.45833333333333	0.206365503080082	0.260700389105058
1	203128742	203153587	24845	203141164.5	0.458333333333332	9.98611111111112	0.458333333333332	12.25	0.458333333333332	7.79166666666667	0.0374149659863945	0.0458970792767731
1	203153975	203166261	12286	203160118	5.91666666666667	13.6944444444444	5.91666666666667	11.0277777777778	5.91666666666667	13.3333333333333	0.536523929471033	0.432048681541583
1	203166376	203206975	40599	203186675.5	5.00000000000001	15.0486111111111	5.00000000000001	12.3333333333333	5.00000000000001	14.3958333333333	0.405405405405406	0.332256575911399
1	203206985	203304356	97371	203255670.5	5.125	15.8125	5.125	13.4861111111111	5.125	13.9166666666667	0.380020597322348	0.324110671936759
1	203304470	203356452	51982	203330461	3.45833333333333	11.1111111111111	3.45833333333333	13.9236111111111	3.45833333333333	7.5	0.248379052369077	0.31125
1	203370288	203621554	251266	203495921	4.97916666666667	11.7222222222222	4.97916666666667	12.7708333333333	4.97916666666667	7.79166666666667	0.389885807504078	0.424763033175355
1	203621627	203688134	66507	203654880.5	8	19.0208333333333	8	15.7048611111111	8	17.8125	0.509396418306434	0.420591456736035
1	204251131	204301977	50846	204276554	8.16666666666667	21.7777777777778	8.16666666666667	19.1805555555556	8.16666666666667	14.9375	0.425778421433744	0.375
1	204301988	204477140	175152	204389564	7.33333333333333	16.3541666666667	7.33333333333333	17.9166666666667	7.33333333333333	7.79166666666667	0.409302325581395	0.448407643312102
1	204477278	204661961	184683	204569619.5	8.72916666666667	14.7847222222222	8.72916666666667	14.5555555555556	8.72916666666667	11.8125	0.599713740458015	0.590418036636918
1	204661975	204800872	138897	204731423.5	0.645833333333335	15.4583333333333	0.645833333333335	16.3194444444444	0.645833333333335	15.2916666666667	0.0395744680851065	0.04177897574124
1	204908479	205232999	324520	205070739	1.58333333333333	10.8611111111111	1.58333333333333	11.5138888888889	1.58333333333333	9.625	0.13751507840772	0.145780051150895
1	205293264	205456780	163516	205375022	5.54166666666667	19.9027777777778	5.54166666666667	11.2222222222222	5.54166666666667	19.3541666666667	0.493811881188119	0.278436845778088
1	205456905	205573456	116551	205515180.5	2.22916666666667	6.99305555555556	2.22916666666667	10.3402777777778	2.22916666666667	6.39583333333333	0.215580926796508	0.318768619662363
1	205573472	205720479	147007	205646975.5	5.60416666666667	13.75	5.60416666666667	10.6180555555556	5.60416666666667	12.4791666666667	0.527795945062132	0.407575757575757
1	205720480	205773780	53300	205747130	3.41666666666666	11.0416666666667	3.41666666666666	13.2083333333333	3.41666666666666	9.8125	0.258675078864353	0.309433962264151
1	205776191	205809848	33657	205793019.5	11.375	17.0277777777778	11.375	16.5694444444444	11.375	15.375	0.68650461022632	0.668026101141925
1	205884105	205896556	12451	205890330.5	7.16666666666667	21.6388888888889	7.16666666666667	22.9166666666667	7.16666666666667	21.25	0.312727272727273	0.331193838254172
1	205896578	205897875	1297	205897226.5	6.16666666666667	16.0277777777778	6.16666666666667	18.6666666666667	6.16666666666667	14.25	0.330357142857143	0.38474870017331
1	205897991	205945083	47092	205921537	2.375	11.3194444444444	2.375	16.1944444444444	2.375	10.375	0.146655231560892	0.209815950920245
1	206163074	206200303	37229	206181688.5	7.29166666666667	21.6111111111111	7.29166666666667	16.3888888888889	7.29166666666667	20.9166666666667	0.444915254237288	0.337403598971722
1	206200801	206305425	104624	206253113	0.083333333333334	8.41666666666667	0.083333333333334	10.6805555555556	0.083333333333334	7.5625	0.00780234070221073	0.00990099009900998
1	206347957	206351224	3267	206349590.5	1.52083333333333	10.5486111111111	1.52083333333333	13.4027777777778	1.52083333333333	10.5416666666667	0.113471502590674	0.144173798551679
1	206351244	206369362	18118	206360303	1.58333333333333	15.0138888888889	1.58333333333333	12.1458333333333	1.58333333333333	13.9791666666667	0.130360205831904	0.105457909343201
1	206369388	206414763	45375	206392075.5	3.04166666666667	9.59722222222223	3.04166666666667	10.1875	3.04166666666667	6.3125	0.298568507157464	0.316931982633864
1	206414817	206448627	33810	206431722	6.60416666666667	12.7152777777778	6.60416666666667	13.4583333333333	6.60416666666667	10	0.490712074303405	0.519388312397597
1	206448638	206616717	168079	206532677.5	3.14583333333333	10.4166666666667	3.14583333333333	12.1388888888889	3.14583333333333	8.625	0.259153318077803	0.302
1	206616718	206793393	176675	206705055.5	1.16666666666667	12.9513888888889	1.16666666666667	12.5833333333333	1.16666666666667	10.5625	0.0927152317880794	0.0900804289544235
1	206793425	206938484	145059	206865954.5	1.25	11.6805555555556	1.25	12.5138888888889	1.25	11.375	0.099889012208657	0.107015457788347
1	207314928	207359339	44411	207337133.5	0.625	11.625	0.625	9.27777777777778	0.625	11.4583333333333	0.0673652694610778	0.053763440860215
1	207359608	207443626	84018	207401617	2.66666666666667	9.80555555555556	2.66666666666667	11.0625	2.66666666666667	8.66666666666667	0.24105461393597	0.271954674220963
1	207443628	207493475	49847	207468551.5	2.375	6.45833333333333	2.375	9.74652777777778	2.375	3.8125	0.243676522978269	0.367741935483871
1	207493481	207561182	67701	207527331.5	4.85416666666667	12.3888888888889	4.85416666666667	13.0277777777778	4.85416666666667	9.64583333333333	0.372601279317697	0.391816143497758
1	207561262	207618969	57707	207590115.5	2.14583333333333	15.6666666666667	2.14583333333333	9.20833333333333	2.14583333333333	15.4166666666667	0.233031674208145	0.136968085106383
1	207618977	207656505	37528	207637741	2.54166666666667	11.6736111111111	2.54166666666667	8.59722222222223	2.54166666666667	10.5	0.295638126009693	0.21772754312909
1	208044387	208283910	239523	208164148.5	1.20833333333333	13.6041666666667	1.20833333333333	11.4027777777778	1.20833333333333	12.6875	0.105968331303288	0.0888208269525266
1	208284278	208493859	209581	208389068.5	1.875	11.8472222222222	1.875	14.0138888888889	1.875	11.2916666666667	0.133795837462835	0.158264947245018
1	208777066	208846194	69128	208811630	2.29166666666667	15.3888888888889	2.29166666666667	13.7638888888889	2.29166666666667	15	0.166498486377397	0.148916967509025
1	208851473	208865987	14514	208858730	1.91666666666667	8.11111111111111	1.91666666666667	8.43055555555556	1.91666666666667	6.95833333333333	0.227347611202636	0.236301369863014
1	208865994	209136642	270648	209001318	2.75	13.2361111111111	2.75	10.6805555555556	2.75	7.60416666666667	0.257477243172952	0.207764952780692
1	209173161	209224379	51218	209198770	0.0416666666666677	5.17361111111111	0.0416666666666677	8.88194444444444	0.0416666666666677	2.97916666666667	0.00469116497263498	0.00805369127516798
1	209224413	209263928	39515	209244170.5	1.20833333333333	5.44444444444445	1.20833333333333	10.7083333333333	1.20833333333333	3.79166666666667	0.11284046692607	0.221938775510204
1	209378802	209546463	167661	209462632.5	0.291666666666668	11.0694444444444	0.291666666666668	12.6666666666667	0.291666666666668	10.8958333333333	0.0230263157894738	0.026348808030113
1	209672994	209708352	35358	209690673	3	10.9097222222222	3	12.2222222222222	3	8.79166666666667	0.245454545454546	0.274984086569064
1	209708367	209710482	2115	209709424.5	0.645833333333337	3.61805555555556	0.645833333333337	12.3402777777778	0.645833333333337	3.22916666666667	0.0523353967360723	0.178502879078696
1	209710486	209858417	147931	209784451.5	16.25	28.4722222222222	16.25	19.125	16.25	28	0.849673202614379	0.570731707317073
1	209858542	210269298	410756	210063920	8.16666666666667	19.2847222222222	8.16666666666667	12.1666666666667	8.16666666666667	17.9166666666667	0.671232876712329	0.42347857400072
1	210269871	210309248	39377	210289559.5	3.85416666666667	8.44444444444444	3.85416666666667	9.95138888888889	3.85416666666667	7.79166666666667	0.387299371946965	0.456414473684211
1	210309258	210353301	44043	210331279.5	2.25	12.7430555555556	2.25	10.7916666666667	2.25	10.9791666666667	0.208494208494209	0.176566757493188
1	210353364	210410553	57189	210381958.5	4.50000000000001	11.0277777777778	4.50000000000001	9.27777777777779	4.50000000000001	9.58333333333334	0.485029940119761	0.408060453400504
1	210410665	210422150	11485	210416407.5	3.33333333333334	20.2222222222222	3.33333333333334	9.19444444444445	3.33333333333334	20	0.362537764350453	0.164835164835165
1	210422224	210424634	2410	210423429	3.70833333333334	7.42361111111112	3.70833333333334	9.22916666666667	3.70833333333334	6.95833333333334	0.401805869074493	0.49953227315248
1	210426631	210449968	23337	210438299.5	3.16666666666667	9.96527777777778	3.16666666666667	9.75000000000001	3.16666666666667	9.93750000000001	0.324786324786325	0.317770034843206
1	210450251	210515482	65231	210482866.5	0.791666666666671	23.3819444444444	0.791666666666671	12.0972222222222	0.791666666666671	22.2708333333333	0.0654420206659016	0.033858033858034
1	210515751	210573802	58051	210544776.5	1.47916666666667	10.8680555555556	1.47916666666667	14.4861111111111	1.47916666666667	9.27083333333333	0.102109300095877	0.136102236421725
1	210884079	211036452	152373	210960265.5	1.9375	11.8680555555556	1.9375	10.4583333333333	1.9375	10.7916666666667	0.185258964143426	0.163253364540667
1	211036996	211314752	277756	211175874	0.333333333333335	16.5	0.333333333333335	19.1666666666667	0.333333333333335	14.8541666666667	0.0173913043478262	0.0202020202020203
1	211316231	211379738	63507	211347984.5	12.6041666666667	22.0833333333333	12.6041666666667	15.9791666666667	12.6041666666667	17.6458333333333	0.788787483702738	0.570754716981132
1	211380716	211566890	186174	211473803	2.04166666666667	17.1736111111111	2.04166666666667	7.97222222222223	2.04166666666667	14.8333333333333	0.25609756097561	0.118883946623534
1	211567625	211576748	9123	211572186.5	3.72916666666667	15.375	3.72916666666667	14.4027777777778	3.72916666666667	14.2916666666667	0.258919961427194	0.242547425474255
1	211685502	211729480	43978	211707491	11.375	45.3333333333333	11.375	13.3055555555556	11.375	45.3333333333333	0.85490605427975	0.250919117647059
1	211729523	212065840	336317	211897681.5	5.85416666666668	39.6458333333333	5.85416666666668	8.41666666666668	5.85416666666668	39.25	0.695544554455446	0.147661586967946
1	212065847	212113757	47910	212089802	3.625	17.9583333333333	3.625	6.56944444444445	3.625	17.2916666666667	0.551797040169133	0.201856148491879
1	212113772	212129469	15697	212121620.5	2.375	10.7638888888889	2.375	6.09722222222222	2.375	10.5833333333333	0.389521640091116	0.220645161290322
1	212129657	212234554	104897	212182105.5	2.08333333333333	14.125	2.08333333333333	7.95833333333334	2.08333333333333	13.6666666666667	0.261780104712042	0.147492625368731
1	212536492	212544499	8007	212540495.5	0.604166666666664	15.6875	0.604166666666664	14.9513888888889	0.604166666666664	15.4583333333333	0.0404087320018577	0.0385126162018591
1	212544585	212575454	30869	212560019.5	1.83333333333333	15.2708333333333	1.83333333333333	14.4583333333333	1.83333333333333	14.75	0.126801152737752	0.120054570259209
1	212575472	212650726	75254	212613099	1.4375	12.5	1.4375	11.1736111111111	1.4375	11.0625	0.128651336233686	0.115
1	212650730	212706978	56248	212678854	2.5	19.1180555555556	2.5	13.8819444444444	2.5	18.8125	0.180090045022511	0.130766436614602
1	212706986	212881350	174364	212794168	4.8125	20.4305555555556	4.8125	7.20833333333334	4.8125	19.75	0.667630057803468	0.235554044867437
1	212881358	212960866	79508	212921112	2.25	18.0416666666667	2.25	8.56944444444445	2.25	18.0416666666667	0.262560777957861	0.124711316397229
1	213306529	213342443	35914	213324486	0.791666666666668	17.1736111111111	0.791666666666668	9.375	0.791666666666668	16.9375	0.0844444444444445	0.0460978568540235
1	213342464	213381191	38727	213361827.5	1.08333333333333	5.31944444444444	1.08333333333333	7.625	1.08333333333333	3.22916666666667	0.142076502732241	0.203655352480418
1	213381205	213505691	124486	213443448	3.5	11.1111111111111	3.5	9.76388888888889	3.5	10.0416666666667	0.35846372688478	0.315
1	214072242	214160493	88251	214116367.5	0.041666666666665	11.9791666666667	0.041666666666665	11.2777777777778	0.041666666666665	10.0416666666667	0.00369458128078803	0.00347826086956508
1	214465059	214540468	75409	214502763.5	7.125	14.9861111111111	7.125	14.4305555555556	7.125	14.0625	0.493743984600577	0.475440222428174
1	214543032	214580825	37793	214561928.5	2.29166666666667	7.59722222222222	2.29166666666667	11.0902777777778	2.29166666666667	5.89583333333333	0.206637445209768	0.301645338208409
1	214778236	214778799	563	214778517.5	0.5625	2.50694444444444	0.5625	8.25	0.5625	0.1875	0.0681818181818182	0.224376731301939
1	214778845	214885423	106578	214832134	3.5	11.4444444444445	3.5	12.7708333333333	3.5	11	0.274061990212072	0.305825242718447
1	214885865	214901882	16017	214893873.5	1.72916666666667	9.54861111111111	1.72916666666667	10.4097222222222	1.72916666666667	7.1875	0.166110740493662	0.181090909090909
1	214936662	214973774	37112	214955218	6.58333333333333	18.8958333333333	6.58333333333333	18.5416666666667	6.58333333333333	16.4791666666667	0.355056179775281	0.348401323042999
1	214973812	215034063	60251	215003937.5	0.500000000000001	7.11111111111111	0.500000000000001	9.04861111111111	0.500000000000001	4.125	0.0552570990023025	0.0703125000000001
1	215092707	215203378	110671	215148042.5	1.45833333333333	9.3125	1.45833333333333	9.94444444444445	1.45833333333333	9.125	0.146648044692738	0.156599552572707
1	215204727	215224133	19406	215214430	2.375	10.5972222222222	2.375	9.77777777777777	2.375	8.625	0.242897727272728	0.224115334207078
1	215253467	215400915	147448	215327191	0.5	11.7777777777778	0.5	12.8472222222222	0.5	11.3541666666667	0.0389189189189189	0.0424528301886793
1	215454479	215558908	104429	215506693.5	1.83333333333334	8.01388888888889	1.83333333333334	11.3888888888889	1.83333333333334	6.1875	0.160975609756098	0.228769497400347
1	215558945	215561143	2198	215560044	7.60416666666667	13.5138888888889	7.60416666666667	11.9375	7.60416666666667	9.52083333333334	0.636998254799302	0.562692702980473
1	215561151	215579160	18009	215570155.5	5.10416666666666	14.5347222222222	5.10416666666666	14.3055555555556	5.10416666666666	7.70833333333334	0.356796116504854	0.351170568561873
1	215579164	215617284	38120	215598224	3.10416666666666	12.375	3.10416666666666	19.0208333333333	3.10416666666666	11.0416666666667	0.163198247535597	0.250841750841751
1	215617376	215651076	33700	215634226	4.72916666666667	14.5625	4.72916666666667	11.9236111111111	4.72916666666667	13.6875	0.396622015142691	0.324749642346209
1	215651079	215715434	64355	215683256.5	2.14583333333334	16.6319444444444	2.14583333333334	11.3472222222222	2.14583333333334	13.8125	0.189106487148103	0.12901878914405
1	215895466	215898336	2870	215896901	2.41666666666667	11.5277777777778	2.41666666666667	6.52777777777778	2.41666666666667	10.0833333333333	0.370212765957447	0.209638554216868
1	215968531	216053003	84472	216010767	3.41666666666667	13.625	3.41666666666667	6.52777777777778	3.41666666666667	12.7916666666667	0.523404255319149	0.250764525993884
1	216103571	216350758	247187	216227164.5	0.020833333333332	13.7708333333333	0.020833333333332	11.0763888888889	0.020833333333332	12.2708333333333	0.00188087774294659	0.00151285930408463
1	216468337	216515740	47403	216492038.5	1.4375	8.97916666666667	1.4375	10.3263888888889	1.4375	7.39583333333334	0.13920645595158	0.160092807424594
1	216519508	216521949	2441	216520728.5	0.625000000000002	9.02777777777778	0.625000000000002	12.4444444444444	0.625000000000002	6.85416666666667	0.0502232142857144	0.0692307692307694
1	216609862	216687513	77651	216648687.5	6.27083333333333	14.2291666666667	6.27083333333333	10.6388888888889	6.27083333333333	9.04166666666667	0.589425587467363	0.440702781844802
1	216687926	216704200	16274	216696063	11.125	21.8194444444444	11.125	12.9583333333333	11.125	21.7916666666667	0.858520900321543	0.50986632718014
1	216704242	216746434	42192	216725338	8.29166666666667	20.0138888888889	8.29166666666667	19.5	8.29166666666667	18.2916666666667	0.425213675213675	0.414295628036086
1	216836790	216898161	61371	216867475.5	4.64583333333334	25.7986111111111	4.64583333333334	15.3541666666667	4.64583333333334	25.8333333333333	0.30257801899593	0.180080753701212
1	216898188	216901205	3017	216899696.5	4.58333333333334	34.4166666666667	4.58333333333334	17.0277777777778	4.58333333333334	34.4166666666667	0.269168026101142	0.13317191283293
1	216901318	216923172	21854	216912245	7.25	19.7916666666667	7.25	14.1805555555556	7.25	19.1875	0.51126346718903	0.366315789473684
1	217395801	217539974	144173	217467887.5	2	10.75	2	11.7152777777778	2	10.125	0.170717249555424	0.186046511627907
1	217586343	217591835	5492	217589089	11.4166666666667	23.6319444444444	11.4166666666667	25.1041666666667	11.4166666666667	20.7916666666667	0.454771784232365	0.483103144284455
1	217591838	217618603	26765	217605220.5	10.9166666666667	20.6875	10.9166666666667	22.5972222222222	10.9166666666667	19.9375	0.483097725875845	0.527693856998993
1	217618624	217626269	7645	217622446.5	1.58333333333333	15.3402777777778	1.58333333333333	14.3333333333333	1.58333333333333	15.1041666666667	0.11046511627907	0.103214124038026
1	217931139	218150311	219172	218040725	0.20833333333333	15.1597222222222	0.20833333333333	12.8194444444445	0.20833333333333	14.375	0.016251354279523	0.0137425561154373
1	218291986	218405371	113385	218348678.5	0.812499999999998	11.0416666666667	0.812499999999998	12.2013888888889	0.812499999999998	8.8125	0.0665907797381899	0.0735849056603772
1	218405486	218572302	166816	218488894	2.79166666666667	9.5	2.79166666666667	7.83333333333333	2.79166666666667	7.60416666666667	0.356382978723405	0.293859649122807
1	218572325	218752530	180205	218662427.5	6.10416666666667	14.9444444444444	6.10416666666667	12.3125	6.10416666666667	10.625	0.495769881556684	0.408457249070632
1	218752566	218761902	9336	218757234	0.104166666666667	12.8472222222222	0.104166666666667	10.5486111111111	0.104166666666667	5.04166666666667	0.00987491770901912	0.00810810810810813
1	218824557	218828099	3542	218826328	0.208333333333333	2.85416666666667	0.208333333333333	9.59027777777778	0.208333333333333	1.72916666666667	0.0217233888486603	0.0729927007299268
1	219653123	219673802	20679	219663462.5	4.33333333333333	11.3402777777778	4.33333333333333	10.8055555555556	4.33333333333333	11.3541666666667	0.401028277634961	0.382118799755052
1	219673936	219733025	59089	219703480.5	3.625	17.9097222222222	3.625	9.38888888888889	3.625	17.4583333333333	0.386094674556213	0.202404032570764
1	219733038	219780384	47346	219756711	2.125	15.0138888888889	2.125	8.84722222222223	2.125	14.9375	0.240188383045526	0.141535615171138
1	219780566	219799363	18797	219789964.5	5.6875	13.5902777777778	5.6875	11.2986111111111	5.6875	13.4583333333333	0.503380454824831	0.418497700562085
1	220033524	220064902	31378	220049213	7.35416666666667	14.2916666666667	7.35416666666667	17.5416666666667	7.35416666666667	12.8541666666667	0.419239904988124	0.514577259475219
1	220064910	220149581	84671	220107245.5	5.20833333333333	10.9236111111111	5.20833333333333	11.4166666666667	5.20833333333333	8.91666666666667	0.456204379562044	0.476795931341386
1	220158230	220249613	91383	220203921.5	0.770833333333334	11.4583333333333	0.770833333333334	10.7013888888889	0.770833333333334	11	0.0720311486048021	0.0672727272727273
1	220249632	220254781	5149	220252206.5	1.22916666666667	6.11111111111111	1.22916666666667	7.96527777777778	1.22916666666667	4.58333333333333	0.154315605928509	0.201136363636364
1	220254997	220313681	58684	220284339	1.91666666666667	9.78472222222222	1.91666666666667	11.4930555555556	1.91666666666667	8.47916666666667	0.166767371601208	0.195883605393896
1	220386335	220469959	83624	220428147	8.75	18.0833333333333	8.75	15.2743055555556	8.75	14.4583333333333	0.572857467606274	0.483870967741935
1	220469973	220692827	222854	220581400	2.45833333333333	10.6111111111111	2.45833333333333	12.9027777777778	2.45833333333333	9.79166666666667	0.190527448869752	0.231675392670157
1	220692891	220767211	74320	220730051	5.70833333333333	14.7222222222222	5.70833333333333	13.1527777777778	5.70833333333333	14.6041666666667	0.434002111932418	0.387735849056604
1	220767256	220769641	2385	220768448.5	2.125	6.0625	2.125	9.23611111111111	2.125	4.3125	0.230075187969925	0.350515463917526
1	220769788	220770542	754	220770165	1.75	6.25	1.75	11.4652777777778	1.75	4.08333333333333	0.152634766807995	0.28
1	220770550	220837267	66717	220803908.5	3.16666666666667	12.6319444444444	3.16666666666667	12.0277777777778	3.16666666666667	11.9166666666667	0.263279445727483	0.250687190764156
1	220858539	220861198	2659	220859868.5	0.583333333333335	10.7986111111111	0.583333333333335	8.36111111111111	0.583333333333335	10	0.0697674418604653	0.0540192926045017
1	220861201	220898392	37191	220879796.5	2.66666666666667	16.3125	2.66666666666667	9.95833333333334	2.66666666666667	15.6041666666667	0.267782426778243	0.163473818646233
1	220898785	220949103	50318	220923944	17.625	32.3472222222222	17.625	23.4444444444444	17.625	31.7916666666667	0.751777251184834	0.544869042507514
1	221247049	221323126	76077	221285087.5	4.1875	22.7986111111111	4.1875	18.5902777777778	4.1875	22.1458333333333	0.225252147926784	0.183673469387755
1	221331653	221441265	109612	221386459	6.83333333333333	17.9652777777778	6.83333333333333	13.5972222222222	6.83333333333333	15.5625	0.502553626149132	0.380363355237727
1	221540576	221628620	88044	221584598	6.41666666666667	11.4236111111111	6.41666666666667	10.6666666666667	6.41666666666667	8.125	0.6015625	0.561702127659575
1	221703925	221792970	89045	221748447.5	4.33333333333333	11.8472222222222	4.33333333333333	14.4583333333333	4.33333333333333	8.95833333333334	0.29971181556196	0.365767878077374
1	221793009	221862839	69830	221827924	7.02083333333333	15.7847222222222	7.02083333333333	14.7361111111111	7.02083333333333	15.5416666666667	0.476437323279925	0.444786625604927
1	221862859	222063512	200653	221963185.5	14.4375	23.1041666666667	14.4375	19.125	14.4375	22.3333333333333	0.754901960784314	0.624887285843102
1	222063568	222179452	115884	222121510	2.77083333333334	16.3055555555556	2.77083333333334	15.7708333333333	2.77083333333334	13.4166666666667	0.175693527080581	0.169931856899489
1	222179576	222187315	7739	222183445.5	4.16666666666666	15.9583333333333	4.16666666666666	13.2083333333333	4.16666666666666	14.5	0.315457413249211	0.261096605744125
1	222200303	222227859	27556	222214081	16.0833333333333	31.1736111111111	16.0833333333333	21.9722222222222	16.0833333333333	31.1458333333333	0.731984829329962	0.515927823568724
1	222227863	222389279	161416	222308571	9.0625	25.375	9.0625	16.2013888888889	9.0625	24.4166666666667	0.559365623660523	0.357142857142857
1	222773342	222861429	88087	222817385.5	5.52083333333334	25.9861111111111	5.52083333333334	8.00694444444445	5.52083333333334	24.7083333333333	0.689505637467476	0.212453233564939
1	222861445	223008582	147137	222935013.5	2.95833333333333	12.2152777777778	2.95833333333333	13.2361111111111	2.95833333333333	9.95833333333333	0.223504721930745	0.242183058555998
1	223008644	223087282	78638	223047963	1.91666666666667	15.9305555555556	1.91666666666667	13.0555555555556	1.91666666666667	15.6666666666667	0.146808510638298	0.120313862249346
1	223087609	223097984	10375	223092796.5	7.89583333333333	29.2361111111111	7.89583333333333	15.1736111111111	7.89583333333333	27.625	0.520366132723112	0.270071258907363
1	223382167	223430774	48607	223406470.5	12.9583333333333	21.1458333333333	12.9583333333333	17.9027777777778	12.9583333333333	19.1458333333333	0.723816912335143	0.612807881773399
1	223430800	223599503	168703	223515151.5	7.29166666666667	25.0347222222222	7.29166666666667	8.45833333333334	7.29166666666667	24.4791666666667	0.862068965517241	0.29126213592233
1	223599545	223601605	2060	223600575	3.66666666666667	15.3888888888889	3.66666666666667	5.83333333333333	3.66666666666667	15.25	0.628571428571429	0.23826714801444
1	223601608	223612782	11174	223607195	9.375	25.2569444444444	9.375	11.0416666666667	9.375	25.2291666666667	0.849056603773585	0.371185042617542
1	223612849	223737046	124197	223674947.5	10.0833333333333	28.7847222222222	10.0833333333333	14.5833333333333	10.0833333333333	28.7291666666667	0.691428571428571	0.350301568154403
1	223737169	223749314	12145	223743241.5	0.312500000000002	8.04166666666667	0.312500000000002	10.7638888888889	0.312500000000002	6.9375	0.0290322580645163	0.0388601036269433
1	223750079	223849971	99892	223800025	3.75	16.8125	3.75	12.7777777777778	3.75	16.3958333333333	0.293478260869565	0.223048327137546
1	223849972	223889489	39517	223869730.5	2.52083333333334	10.9583333333333	2.52083333333334	10.4652777777778	2.52083333333334	10.3125	0.240875912408759	0.230038022813688
1	223889557	223993872	104315	223941714.5	2.75	15.1875	2.75	10.875	2.75	15.1875	0.252873563218391	0.181069958847737
1	223994053	224044480	50427	224019266.5	0.104166666666665	6.95833333333333	0.104166666666665	11.5	0.104166666666665	4.20833333333333	0.00905797101449264	0.0149700598802393
1	224143102	224165432	22330	224154267	13.5625	42.0069444444444	13.5625	15.8541666666667	13.5625	41.5208333333333	0.855453350854139	0.322863283187303
1	224165582	224170436	4854	224168009	2.95833333333334	10.9583333333333	2.95833333333334	10.1388888888889	2.95833333333334	10.75	0.291780821917808	0.269961977186312
1	224170484	224301373	130889	224235928.5	11.4583333333333	34.6111111111111	11.4583333333333	13.2916666666667	11.4583333333333	34.4791666666667	0.862068965517241	0.331059390048154
1	224301882	224307203	5321	224304542.5	6.41666666666667	18.0694444444444	6.41666666666667	11.6388888888889	6.41666666666667	16.8125	0.551312649164678	0.35511145272867
1	224307221	224440906	133685	224374063.5	5.625	23	5.625	12.1666666666667	5.625	22.6875	0.462328767123288	0.244565217391304
1	224440947	224483316	42369	224462131.5	5.37500000000001	34.1736111111111	5.37500000000001	13.9861111111111	5.37500000000001	33.9166666666667	0.384309831181728	0.157285104653526
1	224483442	224568347	84905	224525894.5	3.33333333333333	26.1944444444444	3.33333333333333	12.7847222222222	3.33333333333333	26.1458333333333	0.260727865290603	0.127253446447508
1	224568695	224785082	216387	224676888.5	0.937500000000001	21.4444444444444	0.937500000000001	15.4097222222222	0.937500000000001	21.3333333333333	0.060838215412348	0.0437176165803109
1	224804505	224846818	42313	224825661.5	0.125000000000003	11.6805555555556	0.125000000000003	11.2638888888889	0.125000000000003	10.9791666666667	0.0110974106041926	0.0107015457788349
1	225097582	225189840	92258	225143711	3	13.0972222222222	3	11.9583333333333	3	11.875	0.250871080139373	0.229056203605515
1	225415384	225422635	7251	225419009.5	8.66666666666666	30.3819444444444	8.66666666666666	10.8888888888889	8.66666666666666	30.2708333333333	0.795918367346939	0.285257142857143
1	225422724	225549484	126760	225486104	10.25	37.4305555555556	10.25	11.4166666666667	10.25	37.4375	0.897810218978102	0.273840445269017
1	225549646	225560068	10422	225554857	10.5	37.4513888888889	10.5	13	10.5	37.3125	0.807692307692307	0.280363434081216
1	225560073	225568249	8176	225564161	0.749999999999998	9.02777777777778	0.749999999999998	7.20833333333333	0.749999999999998	7.83333333333333	0.104046242774566	0.0830769230769228
1	225568260	225654801	86541	225611530.5	2.20833333333333	12.4444444444444	2.20833333333333	9.83333333333333	2.20833333333333	11.7291666666667	0.224576271186441	0.177455357142857
1	225654899	225732204	77305	225693551.5	7.29166666666667	15.0069444444444	7.29166666666667	9.29166666666667	7.29166666666667	14.875	0.784753363228699	0.485886163813049
1	225732316	225931648	199332	225831982	5.14583333333334	21.0069444444444	5.14583333333334	13.5	5.14583333333334	20.9375	0.381172839506173	0.244958677685951
1	225931943	226062813	130870	225997378	3.33333333333333	11.6319444444444	3.33333333333333	6.45833333333333	3.33333333333333	9.85416666666667	0.516129032258064	0.286567164179104
1	226062867	226189807	126940	226126337	2.375	7.97222222222222	2.375	10.2916666666667	2.375	4.54166666666667	0.230769230769231	0.297909407665505
1	226236634	226321880	85246	226279257	6.625	15.5138888888889	6.625	12.7361111111111	6.625	14.3333333333333	0.520174482006543	0.427036705461056
1	226321901	226380424	58523	226351162.5	3.60416666666666	16.6319444444444	3.60416666666666	13.9305555555556	3.60416666666666	15.4375	0.258723828514456	0.21670146137787
1	226468432	226533640	65208	226501036	4.16666666666667	18.5763888888889	4.16666666666667	16.0416666666667	4.16666666666667	18.2708333333333	0.25974025974026	0.224299065420561
1	226533876	226684649	150773	226609262.5	0.0833333333333376	11.0972222222222	0.0833333333333376	15.4652777777778	0.0833333333333376	9.52083333333333	0.00538841490794819	0.00750938673341715
1	226684656	226831167	146511	226757911.5	2.875	8.41666666666667	2.875	9.54861111111111	2.875	7.79166666666667	0.301090909090909	0.341584158415842
1	226831319	226988246	156927	226909782.5	5.75	17.9722222222222	5.75	7.52777777777778	5.75	16.5	0.763837638376384	0.319938176197836
1	226988444	227014013	25569	227001228.5	7	15.8333333333333	7	15.3055555555556	7	15.4166666666667	0.457350272232305	0.442105263157895
1	227014119	227026060	11941	227020089.5	7.52083333333334	13.7916666666667	7.52083333333334	9.77083333333334	7.52083333333334	13.7916666666667	0.769722814498934	0.545317220543807
1	227066276	227173133	106857	227119704.5	1.83333333333333	11.25	1.83333333333333	11.9791666666667	1.83333333333333	9.875	0.153043478260869	0.162962962962963
1	227219383	227376881	157498	227298132	0.333333333333332	8.44444444444445	0.333333333333332	14.2083333333333	0.333333333333332	7.4375	0.0234604105571847	0.0394736842105262
1	227376904	227653667	276763	227515285.5	3.45833333333333	14.7152777777778	3.45833333333333	14.0763888888889	3.45833333333333	14.0833333333333	0.24568327577701	0.235016517225106
1	227653679	227818518	164839	227736098.5	8.08333333333333	26.7569444444444	8.08333333333333	16.3055555555556	8.08333333333333	26.7083333333333	0.495741056218058	0.302102257980794
1	227818821	227995421	176600	227907121	11.125	33.4583333333333	11.125	16.9027777777778	11.125	33.4583333333333	0.658175842235004	0.332503113325031
1	227995709	228080361	84652	228038035	8.14583333333333	28.1041666666667	8.14583333333333	19.3125	8.14583333333333	27.8541666666667	0.421790722761596	0.289844329132691
1	228082981	228210696	127715	228146838.5	10.5833333333333	28.8888888888889	10.5833333333333	13.4861111111111	10.5833333333333	28.8125	0.78475798146241	0.366346153846154
1	228210784	228313887	103103	228262335.5	8.66666666666667	21.9305555555556	8.66666666666667	13.3611111111111	8.66666666666667	21.5416666666667	0.648648648648648	0.395186827105763
1	228314071	228331628	17557	228322849.5	1.97916666666667	8.54861111111111	1.97916666666667	14.1388888888889	1.97916666666667	6.45833333333333	0.139980353634578	0.231519090170593
1	228331662	228468466	136804	228400064	5.20833333333334	14.5069444444444	5.20833333333334	12.1805555555556	5.20833333333334	12.875	0.427594070695553	0.359023456199139
1	228476034	228515847	39813	228495940.5	0.583333333333335	6.58333333333334	0.583333333333335	11.8472222222222	0.583333333333335	6	0.049237983587339	0.088607594936709
1	228515881	228517851	1970	228516866	0.666666666666664	4.41666666666668	0.666666666666664	11.2222222222222	0.666666666666664	3.41666666666667	0.0594059405940593	0.150943396226414
1	228517862	228547896	30034	228532879	1.66666666666667	7.29166666666668	1.66666666666667	10.8402777777778	1.66666666666667	6.79166666666667	0.153747597693786	0.228571428571428
1	228547898	228551692	3794	228549795	2.41666666666667	10.1111111111111	2.41666666666667	12.9861111111111	2.41666666666667	10	0.186096256684492	0.239010989010989
1	228551760	228553048	1288	228552404	0.708333333333331	4.06944444444445	0.708333333333331	10.5555555555555	0.708333333333331	2.97916666666667	0.0671052631578947	0.174061433447098
1	228553052	228612769	59717	228582910.5	0.4375	6.84027777777778	0.4375	8.72916666666666	0.4375	6.20833333333333	0.0501193317422435	0.0639593908629441
1	228764732	228788172	23440	228776452	0.604166666666666	19.7222222222222	0.604166666666666	12.4861111111111	0.604166666666666	19.6041666666667	0.0483870967741935	0.0306338028169014
1	228788186	228803495	15309	228795840.5	4.58333333333334	14.6319444444444	4.58333333333334	11.4722222222222	4.58333333333334	14.5208333333333	0.39951573849879	0.313241575700048
1	228803500	228819666	16166	228811583	2.79166666666667	11.2013888888889	2.79166666666667	10.625	2.79166666666667	11	0.262745098039216	0.24922504649721
1	229034057	229129296	95239	229081676.5	2.3125	14.3611111111111	2.3125	13.3819444444444	2.3125	12.1666666666667	0.172807472755579	0.161025145067698
1	229245243	229252973	7730	229249108	5.20833333333334	16.4861111111111	5.20833333333334	11.3194444444444	5.20833333333334	16.375	0.460122699386503	0.31592249368155
1	229293674	229423597	129923	229358635.5	1.16666666666667	9.70138888888889	1.16666666666667	10.3333333333333	1.16666666666667	9.33333333333333	0.112903225806452	0.120257695060845
1	229423616	229542460	118844	229483038	4.79166666666667	16.2291666666667	4.79166666666667	16.9027777777778	4.79166666666667	12.1458333333333	0.283483976992605	0.295250320924262
1	229543273	229624080	80807	229583676.5	4.83333333333334	12.8611111111111	4.83333333333334	16.3611111111111	4.83333333333334	8.1875	0.295415959252972	0.375809935205184
1	229625991	229668668	42677	229647329.5	1.91666666666667	13.4305555555556	1.91666666666667	9.58333333333334	1.91666666666667	12.875	0.2	0.142709410548087
1	229774459	229807605	33146	229791032	5.85416666666667	23.6736111111111	5.85416666666667	10.1666666666667	5.85416666666667	23.5416666666667	0.575819672131147	0.247286594309182
1	229808670	229911326	102656	229859998	6.5	27.6666666666667	6.5	13.2777777777778	6.5	27.6666666666667	0.489539748953975	0.234939759036145
1	229911379	229953060	41681	229932219.5	5.41666666666667	19.1180555555556	5.41666666666667	8.91666666666667	5.41666666666667	19.0208333333333	0.607476635514019	0.283327279331638
1	229953084	229954894	1810	229953989	1.97916666666667	11.5069444444444	1.97916666666667	9	1.97916666666667	10	0.219907407407408	0.171997585998793
1	229955111	229966723	11612	229960917	4.16666666666667	17.1944444444444	4.16666666666667	9.94444444444445	4.16666666666667	16.8125	0.418994413407821	0.242326332794831
1	229967330	229976601	9271	229971965.5	0.166666666666667	8.34722222222222	0.166666666666667	7.93055555555556	0.166666666666667	7.22916666666667	0.0210157618213661	0.0199667221297838
1	229979347	230078584	99237	230028965.5	2.58333333333333	10.1458333333333	2.58333333333333	8.54166666666667	2.58333333333333	8.85416666666667	0.302439024390244	0.254620123203285
1	230235884	230263142	27258	230249513	1.41666666666667	16.0902777777778	1.41666666666667	14.75	1.41666666666667	15.0416666666667	0.0960451977401129	0.0880448856279671
1	230263219	230355010	91791	230309114.5	3.41666666666667	14.6180555555556	3.41666666666667	9.44444444444444	3.41666666666667	14	0.361764705882353	0.233729216152019
1	230365603	230431463	65860	230398533	4.875	15.2152777777778	4.875	9.70833333333333	4.875	14.5416666666667	0.502145922746781	0.320401643085349
1	230431649	230532001	100352	230481825	2.29166666666667	10.8125	2.29166666666667	8.34722222222222	2.29166666666667	9.54166666666667	0.274542429284526	0.211946050096339
1	231166157	231249872	83715	231208014.5	3.25	17.1111111111111	3.25	11.4444444444444	3.25	17.0833333333333	0.283980582524272	0.189935064935065
1	231249928	231304724	54796	231277326	6.54166666666667	29.625	6.54166666666667	13.25	6.54166666666667	29.4583333333333	0.4937106918239	0.220815752461322
1	231304889	231334259	29370	231319574	4.33333333333334	17.9652777777778	4.33333333333334	12.2638888888889	4.33333333333334	15.375	0.353340883352209	0.241206030150754
1	231334436	231401191	66755	231367813.5	2.20833333333333	8.76388888888889	2.20833333333333	9.875	2.20833333333333	6.89583333333333	0.223628691983122	0.251980982567353
1	231407100	231449836	42736	231428468	3.33333333333334	7.01388888888889	3.33333333333334	11.4444444444444	3.33333333333334	6.66666666666667	0.29126213592233	0.475247524752476
1	231449857	231509571	59714	231479714	1.25	11.0763888888889	1.25	16.0416666666667	1.25	9.625	0.077922077922078	0.112852664576803
1	231541807	231559935	18128	231550871	9.72916666666666	37.0625	9.72916666666666	12.9375	9.72916666666666	37.0625	0.752012882447665	0.262507026419337
1	231559966	231698965	138999	231629465.5	9.95833333333333	40.7777777777778	9.95833333333333	11.25	9.95833333333333	40.7291666666667	0.885185185185185	0.244209809264305
1	231698967	231769724	70757	231734345.5	5.125	19.9513888888889	5.125	9.59722222222222	5.125	19.4791666666667	0.534008683068017	0.256874347372085
1	231770161	231835809	65648	231802985	8.08333333333333	38.6666666666667	8.08333333333333	11.9722222222222	8.08333333333333	38.5416666666667	0.675174013921114	0.209051724137931
1	231836246	232111642	275396	231973944	1.22916666666667	9.84027777777778	1.22916666666667	12.1527777777778	1.22916666666667	9.35416666666667	0.101142857142857	0.124911785462244
1	232111711	232115433	3722	232113572	0.1875	4.02777777777778	0.1875	12.6180555555556	0.1875	3.1875	0.0148596587782058	0.046551724137931
1	232115526	232371952	256426	232243739	4.58333333333333	12.4930555555556	4.58333333333333	11.4305555555556	4.58333333333333	11.875	0.40097205346294	0.366870483602001
1	232372049	232540877	168828	232456463	9.70833333333333	21.8819444444444	9.70833333333333	13.3472222222222	9.70833333333333	21.8333333333333	0.727367325702393	0.4436686766106
1	232541253	232667716	126463	232604484.5	2.47916666666667	15.3611111111111	2.47916666666667	8.75	2.47916666666667	14.9166666666667	0.283333333333333	0.161392405063291
1	232667803	232685236	17433	232676519.5	0.708333333333329	13.375	0.708333333333329	10.5	0.708333333333329	13.375	0.067460317460317	0.052959501557632
1	232715313	232901276	185963	232808294.5	1.375	11.1944444444444	1.375	15.3194444444444	1.375	9.83333333333334	0.0897552130553039	0.122828784119107
1	232901342	233056583	155241	232978962.5	5.5	17.3055555555556	5.5	9.36111111111111	5.5	17	0.58753709198813	0.317817014446228
1	233056584	233061777	5193	233059180.5	7.70833333333333	20.7083333333333	7.70833333333333	11.5694444444444	7.70833333333333	19.8541666666667	0.666266506602641	0.372233400402415
1	233061859	233250569	188710	233156214	2.89583333333333	19.7361111111111	2.89583333333333	11.7013888888889	2.89583333333333	19.5416666666667	0.247477744807122	0.146727656579873
1	233250721	233268145	17424	233259433	1.04166666666667	9.80555555555556	1.04166666666667	8.40277777777778	1.04166666666667	9.1875	0.12396694214876	0.106232294617564
1	233268153	233480950	212797	233374551.5	0.833333333333334	16.8819444444444	0.833333333333334	12.0555555555556	0.833333333333334	16.1666666666667	0.0691244239631337	0.0493624023035788
1	233481102	233585079	103977	233533090.5	3.95833333333333	15.2847222222222	3.95833333333333	10.8472222222222	3.95833333333333	14.5833333333333	0.364916773367478	0.258973194002726
1	233617611	233622217	4606	233619914	2.75	12.4583333333333	2.75	8.38888888888889	2.75	12.2916666666667	0.327814569536424	0.220735785953177
1	233622288	233646773	24485	233634530.5	2.5	11	2.5	9.86111111111111	2.5	10.5208333333333	0.253521126760563	0.227272727272727
1	233646992	233774678	127686	233710835	3.93750000000001	11.6458333333333	3.93750000000001	9.89583333333334	3.93750000000001	11.4166666666667	0.397894736842106	0.338103756708408
1	233774688	233873744	99056	233824216	4.75	14.4097222222222	4.75	11.8888888888889	4.75	13.8541666666667	0.399532710280374	0.329638554216867
1	233873778	233884352	10574	233879065	3.375	19.5138888888889	3.375	7.54166666666667	3.375	19.2916666666667	0.447513812154696	0.172953736654804
1	233884560	233954879	70319	233919719.5	6.5	17.6944444444444	6.5	9.19444444444444	6.5	16.3333333333333	0.706948640483383	0.36734693877551
1	233954925	234027548	72623	233991236.5	6.3125	23.6597222222222	6.3125	11.6875	6.3125	22.4166666666667	0.540106951871658	0.2668036395656
1	234027669	234063224	35555	234045446.5	1.1875	8.125	1.1875	8.31944444444445	1.1875	7.02083333333333	0.142737896494157	0.146153846153846
1	234069216	234194654	125438	234131935	3.4375	18.5138888888889	3.4375	10.6736111111111	3.4375	17.4375	0.322055953155497	0.185671417854463
1	234194785	234236291	41506	234215538	7.1875	23.7569444444444	7.1875	10.0416666666667	7.1875	23.1666666666667	0.715767634854771	0.302543116047939
1	234236299	234237508	1209	234236903.5	6.62499999999999	24.6180555555556	6.62499999999999	10.7569444444444	6.62499999999999	23.5208333333333	0.615881213686249	0.269111424541608
1	234237509	234252953	15444	234245231	13.5416666666667	41.4513888888889	13.5416666666667	14.9861111111111	13.5416666666667	40.9791666666667	0.903614457831325	0.326687887418328
1	234253002	234277796	24794	234265399	12.5	38.0833333333333	12.5	15.3888888888889	12.5	37.7291666666667	0.812274368231047	0.328227571115973
1	234278199	234320423	42224	234299311	5.6875	15.4236111111111	5.6875	13.4444444444444	5.6875	11.125	0.423037190082645	0.368752814047726
1	234321050	234340130	19080	234330590	1.66666666666667	14.5	1.66666666666667	13.4722222222222	1.66666666666667	14.0625	0.123711340206186	0.114942528735632
1	234340133	234385166	45033	234362649.5	4.83333333333334	11.5416666666667	4.83333333333334	9.00000000000001	4.83333333333334	11.1041666666667	0.537037037037037	0.418772563176896
1	234385214	234478101	92887	234431657.5	9.14583333333333	30.9166666666667	9.14583333333333	11.8125	9.14583333333333	30.7708333333333	0.774250440917108	0.295822102425876
1	234478117	234539304	61187	234508710.5	4	12.8055555555556	4	11.2916666666667	4	11.2708333333333	0.354243542435424	0.31236442516269
1	234586572	234835500	248928	234711036	1.16666666666667	7.53472222222222	1.16666666666667	9.88888888888889	1.16666666666667	5.91666666666667	0.117977528089888	0.154838709677419
1	234835524	234849927	14403	234842725.5	3.66666666666667	11.7638888888889	3.66666666666667	13.6527777777778	3.66666666666667	11.2083333333333	0.268565615462869	0.311688311688312
1	234850006	234878595	28589	234864300.5	7.70833333333334	18.3819444444444	7.70833333333334	17.2083333333333	7.70833333333334	18.3541666666667	0.447941888619855	0.419342652058935
1	234884747	234993904	109157	234939325.5	0.708333333333332	13.1527777777778	0.708333333333332	11.9305555555556	0.708333333333332	12.9583333333333	0.0593713620488939	0.0538542766631467
1	235002864	235072851	69987	235037857.5	5.66666666666666	25.75	5.66666666666666	16.9652777777778	5.66666666666666	24.4166666666667	0.334015554645927	0.220064724919094
1	235200069	235425646	225577	235312857.5	0.875000000000001	5.86111111111111	0.875000000000001	11.9722222222222	0.875000000000001	4.89583333333333	0.0730858468677495	0.149289099526066
1	235425829	235549977	124148	235487903	6.25	18.4236111111111	6.25	15.9305555555556	6.25	17.8958333333333	0.39232781168265	0.339238597813796
1	235550001	235641735	91734	235595868	6.91666666666667	21.3888888888889	6.91666666666667	10.7777777777778	6.91666666666667	20.8333333333333	0.641752577319587	0.323376623376623
1	235641739	235707480	65741	235674609.5	4.25	17.0138888888889	4.25	6.80555555555556	4.25	16.6666666666667	0.624489795918368	0.249795918367347
1	235707529	235711989	4460	235709759	0.875	8.25694444444444	0.875	6.01388888888889	0.875	7.22916666666667	0.145496535796767	0.105971404541632
1	235712190	235753098	40908	235732644	2.91666666666667	18.1666666666667	2.91666666666667	8.01388888888889	2.91666666666667	17.8333333333333	0.363951473136915	0.160550458715596
1	235763341	235782292	18951	235772816.5	4.875	19.3333333333333	4.875	9.125	4.875	18.9166666666667	0.534246575342466	0.252155172413793
1	235782311	235855742	73431	235819026.5	4.9375	16.625	4.9375	11.5763888888889	4.9375	15.3541666666667	0.426514697060588	0.296992481203007
1	235965064	236045928	80864	236005496	0.625000000000003	11.0833333333333	0.625000000000003	12.6666666666667	0.625000000000003	9.70833333333334	0.0493421052631581	0.0563909774436093
1	236046030	236108997	62967	236077513.5	9	24.5416666666667	9	13.9166666666667	9	23.7916666666667	0.646706586826347	0.366723259762309
1	236109083	236127209	18126	236118146	5.66666666666667	13.9375	5.66666666666667	11.5625	5.66666666666667	7.70833333333334	0.49009009009009	0.406576980568012
1	236128375	236139708	11333	236134041.5	2.25	7.16666666666667	2.25	10.0625	2.25	6.10416666666667	0.22360248447205	0.313953488372093
1	236139725	236144989	5264	236142357	12.5	17.1875	12.5	15.5	12.5	14.5	0.806451612903226	0.727272727272727
1	236144998	236210255	65257	236177626.5	1.64583333333333	13.8055555555556	1.64583333333333	15.9652777777778	1.64583333333333	13.5833333333333	0.103088299260548	0.119215291750503
1	236210294	236250457	40163	236230375.5	2.5	12.1666666666667	2.5	12.5555555555556	2.5	10.9166666666667	0.199115044247788	0.205479452054794
1	236288641	236303455	14814	236296048	5.66666666666667	15.9652777777778	5.66666666666667	10.7152777777778	5.66666666666667	13.5208333333333	0.528839922229423	0.354936929099609
1	236303465	236508851	205386	236406158	2.9375	12.8194444444444	2.9375	8.34027777777778	2.9375	12.4583333333333	0.352206494587843	0.229144095341279
1	236509415	236632782	123367	236571098.5	1.29166666666667	14.7569444444444	1.29166666666667	11.9583333333333	1.29166666666667	14.0625	0.10801393728223	0.087529411764706
1	236632851	236677239	44388	236655045	10.5833333333333	15.9652777777778	10.5833333333333	15.1111111111111	10.5833333333333	14.0416666666667	0.700367647058823	0.662896911700739
1	236677242	236813302	136060	236745272	1.75000000000001	10.5486111111111	1.75000000000001	9.73611111111111	1.75000000000001	6.41666666666667	0.179743223965764	0.165898617511521
1	236813345	236838207	24862	236825776	2.75	11.6666666666667	2.75	7.30555555555556	2.75	11.6666666666667	0.376425855513308	0.235714285714286
1	236838261	236853436	15175	236845848.5	7.16666666666668	44.3263888888889	7.16666666666668	9.05555555555557	7.16666666666668	43.9583333333333	0.791411042944785	0.161679461068463
1	236853452	236873620	20168	236863536	7.91666666666667	35.7986111111111	7.91666666666667	9.62500000000001	7.91666666666667	34.8541666666667	0.822510822510823	0.221144519883608
1	236873756	236903154	29398	236888455	5.04166666666668	39.0277777777778	5.04166666666668	10.4027777777778	5.04166666666668	38.7916666666667	0.484646194926569	0.129181494661922
1	236903155	236904825	1670	236903990	3.95833333333334	25.7083333333333	3.95833333333334	8.40277777777779	3.95833333333334	25.0416666666667	0.471074380165289	0.153970826580227
1	236904853	236923102	18249	236913977.5	5.56250000000001	24.7708333333333	5.56250000000001	10.2291666666667	5.56250000000001	24.5625	0.543788187372709	0.224558452481077
1	236923129	236973546	50417	236948337.5	3.29166666666666	11.5902777777778	3.29166666666666	11.8263888888889	3.29166666666666	10.75	0.278332354668232	0.284002396644697
1	236974656	237008632	33976	236991644	4.02083333333333	10.3819444444444	4.02083333333333	10.34375	4.02083333333333	9.97916666666667	0.388721047331319	0.387290969899666
1	237008963	237144749	135786	237076856	4.79166666666667	22.0694444444444	4.79166666666667	17.5694444444444	4.79166666666667	21.375	0.272727272727273	0.217117684078037
1	237144973	237222863	77890	237183918	6.14583333333333	16.2083333333333	6.14583333333333	14.0694444444444	6.14583333333333	15.1041666666667	0.436821322803554	0.379177377892031
1	237224543	237257654	33111	237241098.5	2.60416666666667	20.9861111111111	2.60416666666667	15.7986111111111	2.60416666666667	20.7916666666667	0.164835164835165	0.124090006618134
1	237257664	237308253	50589	237282958.5	1.77083333333333	9.32638888888889	1.77083333333333	10.3715277777778	1.77083333333333	7.95833333333333	0.170739872782055	0.189873417721519
1	237308295	237343781	35486	237326038	3.22916666666667	10.5208333333333	3.22916666666667	11.0208333333333	3.22916666666667	9.85416666666667	0.293005671077505	0.306930693069307
1	237343796	237396244	52448	237370020	2.43750000000001	16.4652777777778	2.43750000000001	15.8125	2.43750000000001	15.3958333333333	0.154150197628459	0.148038802193168
1	237515433	237530099	14666	237522766	17	40.5833333333333	17	23.4722222222222	17	40.5833333333333	0.724260355029586	0.418891170431211
1	237530147	237639408	109261	237584777.5	6.75	23.4652777777778	6.75	15.5833333333333	6.75	23.4375	0.433155080213903	0.287659070730985
1	237639455	237754348	114893	237696901.5	2.39583333333334	9.10416666666667	2.39583333333334	9.84027777777778	2.39583333333334	8.33333333333334	0.243472124206069	0.263157894736842
1	237754349	237807974	53625	237781161.5	0.729166666666666	9.56944444444445	0.729166666666666	11.8958333333333	0.729166666666666	7.66666666666667	0.0612959719789842	0.0761973875181421
1	237808213	237900710	92497	237854461.5	5.37500000000001	31.8055555555556	5.37500000000001	9.93055555555556	5.37500000000001	31.6458333333333	0.541258741258742	0.168995633187773
1	237997941	238240101	242160	238119021	1.29166666666667	14.0694444444444	1.29166666666667	8.49305555555556	1.29166666666667	13.625	0.152085036794767	0.091806515301086
1	238240146	238400283	160137	238320214.5	1.16666666666667	9.45833333333333	1.16666666666667	11.6319444444444	1.16666666666667	8.625	0.100298507462687	0.123348017621145
1	238580950	238680185	99235	238630567.5	6.27083333333333	17.0277777777778	6.27083333333333	12.0902777777778	6.27083333333333	15.7916666666667	0.518667432510052	0.368270799347472
1	238681747	238767618	85871	238724682.5	9.72916666666667	19.2222222222222	9.72916666666667	15.9791666666667	9.72916666666667	18.75	0.608865710560626	0.50614161849711
1	238767626	238889239	121613	238828432.5	0.499999999999999	16.1319444444444	0.499999999999999	9.34722222222223	0.499999999999999	15.6041666666667	0.0534918276374441	0.0309944037882048
1	239292391	239362912	70521	239327651.5	0.541666666666664	8.54166666666667	0.541666666666664	13.7708333333333	0.541666666666664	8.41666666666667	0.0393343419062025	0.0634146341463411
1	239378978	239463825	84847	239421401.5	3.52083333333333	6.86111111111111	3.52083333333333	7.78472222222222	3.52083333333333	5.375	0.452274754683318	0.513157894736842
1	239463828	239493149	29321	239478488.5	0.458333333333331	5.9375	0.458333333333331	8.63194444444444	0.458333333333331	4.97916666666667	0.0530973451327431	0.07719298245614
1	239496577	239506890	10313	239501733.5	1.25	6.36805555555556	1.25	7.88888888888889	1.25	3.47916666666667	0.158450704225352	0.19629225736096
1	239506941	239560316	53375	239533628.5	2.41666666666667	9.875	2.41666666666667	10.9166666666667	2.41666666666667	6.91666666666667	0.221374045801527	0.244725738396625
1	239560320	239596905	36585	239578612.5	8.95833333333333	19.8888888888889	8.95833333333333	12.7638888888889	8.95833333333333	18.9791666666667	0.701849836779108	0.450418994413408
1	239614341	239724901	110560	239669621	3.58333333333333	20.9930555555556	3.58333333333333	11.9166666666667	3.58333333333333	20.7083333333333	0.300699300699301	0.170691366192524
1	239724916	239812800	87884	239768858	0.14583333333333	18.3055555555556	0.14583333333333	15.4305555555556	0.14583333333333	17.7708333333333	0.0094509450945092	0.00796661608497703
1	239886461	239978567	92106	239932514	0.624999999999999	12.2986111111111	0.624999999999999	10.7013888888889	0.624999999999999	11.375	0.0584036340038935	0.0508187464709203
1	239978573	240066627	88054	240022600	0.291666666666667	12.2083333333333	0.291666666666667	9.90277777777777	0.291666666666667	11.3125	0.02945301542777	0.0238907849829352
1	240130195	240154119	23924	240142157	3.75	15.0347222222222	3.75	9.5	3.75	14.0625	0.394736842105263	0.249422632794457
1	240154161	240203801	49640	240178981	3.02083333333333	8.51388888888889	3.02083333333333	10.875	3.02083333333333	7.47916666666667	0.277777777777778	0.354812398042414
1	240392985	240434569	41584	240413777	3.97916666666667	10.5277777777778	3.97916666666667	12	3.97916666666667	7.52083333333333	0.331597222222222	0.377968337730871
1	240434609	240487241	52632	240460925	3.66666666666667	14.3611111111111	3.66666666666667	13.8888888888889	3.66666666666667	11.6875	0.264	0.25531914893617
1	240487879	240565424	77545	240526651.5	2.83333333333333	16.9861111111111	2.83333333333333	12.375	2.83333333333333	16.3541666666667	0.228956228956229	0.166802943581357
1	240881719	240962310	80591	240922014.5	0.291666666666665	11.9375	0.291666666666665	12.8194444444444	0.291666666666665	9.39583333333334	0.0227518959913325	0.0244328097731238
1	241222525	241283918	61393	241253221.5	4.95833333333333	17.1458333333333	4.95833333333333	18.5694444444444	4.95833333333333	14.2291666666667	0.267015706806282	0.289185905224787
1	241563220	241613482	50262	241588351	2.58333333333333	7.20138888888889	2.58333333333333	10.0694444444444	2.58333333333333	4.33333333333333	0.256551724137931	0.358727097396336
1	241970406	242147405	176999	242058905.5	12.6875	19.4513888888889	12.6875	20.4722222222222	12.6875	17.5833333333333	0.619742198100407	0.652267047483042
1	242147418	242218196	70778	242182807	0.208333333333335	15.0625	0.208333333333335	20.2083333333333	0.208333333333335	8.1875	0.0103092783505155	0.0138312586445367
1	242218200	242337745	119545	242277972.5	10.6666666666667	21.0138888888889	10.6666666666667	19.5694444444444	10.6666666666667	12.6875	0.545067423704755	0.507600793126239
1	242337760	242345942	8182	242341851	5.95833333333333	11.6458333333333	5.95833333333333	10.875	5.95833333333333	6.1875	0.547892720306513	0.511627906976744
1	242345962	242446990	101028	242396476	12.8125	24.2430555555556	12.8125	21.9375	12.8125	13.8333333333333	0.584045584045584	0.528501861930679
1	242451376	242474021	22645	242462698.5	15.1875	24.5277777777778	15.1875	24.2361111111111	15.1875	23.3125	0.626647564469914	0.619195922989807
1	242534113	242596161	62048	242565137	5.45833333333333	23.1319444444444	5.45833333333333	17.9722222222222	5.45833333333333	23.0208333333333	0.30370942812983	0.235965175622936
1	242596235	242615891	19656	242606063	5.52083333333333	19.5833333333333	5.52083333333333	16.9930555555556	5.52083333333333	19.3958333333333	0.324887617490805	0.281914893617021
1	242615905	242638639	22734	242627272	2.89583333333333	22.2777777777778	2.89583333333333	13.4375	2.89583333333333	21.7291666666667	0.215503875968992	0.12998753117207
1	242638716	242762289	123573	242700502.5	3.1875	17.875	3.1875	16.9027777777778	3.1875	17.4375	0.188578471651602	0.178321678321678
1	242762322	242891027	128705	242826674.5	0.0624999999999996	9.51388888888889	0.0624999999999996	10.8055555555556	0.0624999999999996	8.77083333333333	0.00578406169665806	0.00656934306569339
1	242963881	243095197	131316	243029539	0.750000000000003	23.5486111111111	0.750000000000003	10.1111111111111	0.750000000000003	23.3541666666667	0.0741758241758245	0.0318490120908288
1	243095280	243187359	92079	243141319.5	5.83333333333334	40.1944444444444	5.83333333333334	9.33333333333334	5.83333333333334	38.9583333333333	0.625	0.14512785072564
1	243201572	243272182	70610	243236877	4.50000000000001	27.6458333333333	4.50000000000001	14.25	4.50000000000001	27.125	0.315789473684211	0.162773172569706
1	243272498	243390758	118260	243331628	5.9375	22.6527777777778	5.9375	11.5902777777778	5.9375	21.4166666666667	0.512282804074296	0.262109135499693
1	243390780	243517506	126726	243454143	1.45833333333333	12.9583333333333	1.45833333333333	7.86111111111111	1.45833333333333	11.75	0.185512367491166	0.112540192926045
1	243521164	243789027	267863	243655095.5	6.79166666666667	24.7430555555556	6.79166666666667	10.1597222222222	6.79166666666667	24.1041666666667	0.66848940533151	0.274487791187202
1	243789229	243838298	49069	243813763.5	9.20833333333333	34.1458333333333	9.20833333333333	14.1805555555556	9.20833333333333	33.5833333333333	0.649363369245837	0.269676632092739
1	244300889	244387894	87005	244344391.5	3.58333333333334	14.6388888888889	3.58333333333334	8.25	3.58333333333334	14.2708333333333	0.434343434343435	0.244781783681215
1	244387954	244430591	42637	244409272.5	1.47916666666667	5.86805555555556	1.47916666666667	8.39583333333333	1.47916666666667	5.5	0.176178660049628	0.25207100591716
1	244430597	244451819	21222	244441208	3.6875	8.32638888888889	3.6875	7.45138888888889	3.6875	6.625	0.494874184529357	0.442869057547957
1	244452108	244521555	69447	244486831.5	1.0625	4.69444444444445	1.0625	9.77083333333333	1.0625	2.97916666666667	0.108742004264392	0.226331360946745
1	244521562	244576359	54797	244548960.5	0.291666666666664	6.64583333333333	0.291666666666664	7.36111111111111	0.291666666666664	5	0.0396226415094336	0.0438871473354228
1	244577677	244656476	78799	244617076.5	1.70833333333334	13.5694444444444	1.70833333333334	10.25	1.70833333333334	12.3958333333333	0.166666666666667	0.12589559877175
1	244658855	244742209	83354	244700532	6.89583333333333	12.3819444444444	6.89583333333333	11.3645833333333	6.89583333333333	11.8541666666667	0.606782768102658	0.556926528323051
1	244742228	244825112	82884	244783670	2.16666666666667	15.5833333333333	2.16666666666667	11.2986111111111	2.16666666666667	14.2291666666667	0.191763982790412	0.13903743315508
1	244825245	244896269	71024	244860757	4.60416666666667	23.125	4.60416666666667	9.93750000000001	4.60416666666667	22.5416666666667	0.463312368972746	0.199099099099099
1	245222037	245332180	110143	245277108.5	0.85416666666667	14.7847222222222	0.85416666666667	17.0069444444444	0.85416666666667	12.3125	0.0502245814618214	0.0577736026303431
1	245591292	245846699	255407	245718995.5	3.45833333333334	19.2777777777778	3.45833333333334	16	3.45833333333334	17.4583333333333	0.216145833333333	0.179394812680115
1	245940842	246012804	71962	245976823	4.20833333333333	16.8541666666667	4.20833333333333	19.125	4.20833333333333	15.625	0.220043572984749	0.249690976514215
1	246012811	246099565	86754	246056188	3.66666666666667	18.4513888888889	3.66666666666667	11.5138888888889	3.66666666666667	17.0625	0.318455971049457	0.198720361309748
1	246418149	246543794	125645	246480971.5	0.687500000000001	10.2708333333333	0.687500000000001	15.5416666666667	0.687500000000001	9.08333333333333	0.0442359249329759	0.0669371196754564
1	246610512	246721363	110851	246665937.5	1.875	11.5555555555556	1.875	6.23611111111111	1.875	10.7291666666667	0.300668151447662	0.162259615384615
1	246721390	246725622	4232	246723506	3.08333333333333	12.8611111111111	3.08333333333333	5.91666666666667	3.08333333333333	12.4166666666667	0.52112676056338	0.239740820734341
1	246919968	247186660	266692	247053314	0.625000000000001	2.95833333333333	0.625000000000001	4.94444444444445	0.625000000000001	2.5625	0.126404494382023	0.211267605633803
1	247186679	247188017	1338	247187348	0.583333333333334	1.70138888888889	0.583333333333334	4.07291666666667	0.583333333333334	1.04166666666667	0.143222506393862	0.342857142857143
1	247188035	247505803	317768	247346919	2.02083333333333	7.13194444444444	2.02083333333333	11.8680555555556	2.02083333333333	4.375	0.170275014628438	0.283349561830575
1	248185043	248458268	273225	248321655.5	1.29166666666667	12.5416666666667	1.29166666666667	13.75	1.29166666666667	12.0416666666667	0.0939393939393938	0.102990033222591
1	248458276	248484598	26322	248471437	1.77083333333334	8.41666666666667	1.77083333333334	9.03472222222222	1.77083333333334	7.10416666666667	0.196003074558032	0.210396039603961
1	248749545	248802033	52488	248775789	0.583333333333331	9.08333333333333	0.583333333333331	14.7222222222222	0.583333333333331	6.41666666666667	0.0396226415094338	0.0642201834862383
1	248895895	248911128	15233	248903511.5	4.50000000000001	15.5625	4.50000000000001	11.6111111111111	4.50000000000001	13.3125	0.387559808612441	0.289156626506025
1	248911165	249122972	211807	249017068.5	0.833333333333334	12.0763888888889	0.833333333333334	9.38194444444445	0.833333333333334	11.1875	0.0888230940044411	0.0690051753881541
1	249122986	249138711	15725	249130848.5	1.14583333333334	15	1.14583333333334	7.63194444444445	1.14583333333334	14.5416666666667	0.150136487716106	0.0763888888888891
1	249138720	249147138	8418	249142929	2.8125	6.625	2.8125	8.75	2.8125	5.16666666666667	0.321428571428572	0.424528301886793
1	249147175	249241624	94449	249194399.5	1.58333333333333	12.0555555555556	1.58333333333333	13.2916666666667	1.58333333333333	11.2916666666667	0.119122257053292	0.131336405529954
1	249467316	249478793	11477	249473054.5	7.125	16.4305555555556	7.125	17.5	7.125	15.4583333333333	0.407142857142857	0.433643279797126
1	249480964	249515121	34157	249498042.5	1.125	9.0625	1.125	11.6736111111111	1.125	5.35416666666667	0.0963712076145151	0.124137931034483
1	250136250	250247337	111087	250191793.5	1.25	19.2986111111111	1.25	15.2777777777778	1.25	18.2916666666667	0.0818181818181816	0.0647715005397623
1	250247476	250440036	192560	250343756	2.95833333333333	16.4583333333333	2.95833333333333	15.0416666666667	2.95833333333333	14.4791666666667	0.196675900277008	0.179746835443038
1	250931069	251151670	220601	251041369.5	5.20833333333333	16.5347222222222	5.20833333333333	15.5694444444444	5.20833333333333	14.7916666666667	0.334522747546833	0.314993700125998
1	251151708	251196310	44602	251174009	4.58333333333333	14.5972222222222	4.58333333333333	10.6388888888889	4.58333333333333	12.3958333333333	0.430809399477807	0.313986679352997
1	251203656	251446810	243154	251325233	0.104166666666665	14.5763888888889	0.104166666666665	13.8333333333333	0.104166666666665	13.5208333333333	0.00753012048192762	0.00714626012386842
1	251446872	251676412	229540	251561642	0.291666666666667	6.36111111111111	0.291666666666667	11.8680555555556	0.291666666666667	4.9375	0.0245757753071972	0.0458515283842795
1	251747272	251769155	21883	251758213.5	0.0833333333333354	9.08333333333333	0.0833333333333354	12.75	0.0833333333333354	8.16666666666667	0.00653594771241846	0.00917431192660573
1	251774031	251791354	17323	251782692.5	0.375000000000001	3.89583333333333	0.375000000000001	11.8333333333333	0.375000000000001	3.14583333333333	0.0316901408450705	0.0962566844919788
1	251791386	251886743	95357	251839064.5	2.41666666666667	14.625	2.41666666666667	12.7916666666667	2.41666666666667	13.7708333333333	0.188925081433225	0.165242165242165
1	251890481	252333214	442733	252111847.5	2.04166666666666	10.4930555555556	2.04166666666666	11.2916666666667	2.04166666666666	9.66666666666667	0.180811808118081	0.194573130377233
1	252333304	252378429	45125	252355866.5	5.52083333333333	12.5625	5.52083333333333	14.8125	5.52083333333333	12.0625	0.372714486638537	0.439469320066335
1	252378456	252436364	57908	252407410	3.60416666666667	14.1388888888889	3.60416666666667	17.1319444444444	3.60416666666667	13.8958333333333	0.210376976084313	0.254911591355599
1	252591737	252857779	266042	252724758	1.8125	13.4097222222222	1.8125	11.8194444444444	1.8125	11.875	0.153349001175088	0.135163127912998
1	252857924	252866537	8613	252862230.5	1.20833333333334	18.2013888888889	1.20833333333334	16.4027777777778	1.20833333333334	17.6458333333333	0.0736663844199832	0.0663868752384587
1	252870048	252988813	118765	252929430.5	1.02083333333333	14.5347222222222	1.02083333333333	18.4305555555556	1.02083333333333	14.1041666666667	0.0553880934438583	0.0702341137123746
1	253254878	253256917	2039	253255897.5	3.4375	7.90972222222222	3.4375	7.35416666666667	3.4375	7.3125	0.467422096317281	0.43459174714662
1	253257034	253356024	98990	253306529	0.375000000000001	10.2986111111111	0.375000000000001	9.91666666666667	0.375000000000001	10.1875	0.0378151260504203	0.0364126770060689
1	253356078	253419786	63708	253387932	0.958333333333337	11.3819444444444	0.958333333333337	11.4444444444444	0.958333333333337	10.0208333333333	0.0837378640776702	0.084197681513118
1	253563293	253672117	108824	253617705	0.145833333333335	7.79166666666667	0.145833333333335	9.81944444444444	0.145833333333335	4.83333333333333	0.014851485148515	0.0187165775401072
1	254318776	254322770	3994	254320773	6.83333333333334	17.6388888888889	6.83333333333334	10.8888888888889	6.83333333333334	17.5833333333333	0.627551020408164	0.38740157480315
1	254322776	254455398	132622	254389087	5.60416666666666	29.5416666666667	5.60416666666666	15.2916666666667	5.60416666666666	28.7708333333333	0.366485013623978	0.189703808180536
1	254526073	254539570	13497	254532821.5	1.04166666666667	9.79166666666667	1.04166666666667	13.3888888888889	1.04166666666667	7.54166666666667	0.077800829875519	0.106382978723405
1	254539586	254587382	47796	254563484	0.208333333333334	12.25	0.208333333333334	16.9583333333333	0.208333333333334	12.25	0.0122850122850123	0.0170068027210885
1	254588101	254613457	25356	254600779	2.625	11.2083333333333	2.625	13	2.625	10.8125	0.201923076923077	0.234200743494424
1	254814782	254865043	50261	254839912.5	1.625	8.60416666666666	1.625	12.2361111111111	1.625	4.91666666666667	0.132803632236095	0.188861985472155
1	254865221	254944710	79489	254904965.5	0.229166666666668	5.10416666666667	0.229166666666668	7.85416666666667	0.229166666666668	3.375	0.0291777188328914	0.0448979591836738
1	254944730	254954523	9793	254949626.5	4.45833333333333	13.6527777777778	4.45833333333333	10.2777777777778	4.45833333333333	12.7291666666667	0.433783783783784	0.326551373346897
1	254954541	255156612	202071	255055576.5	4.5	15.25	4.5	12.5833333333333	4.5	14.5416666666667	0.357615894039735	0.295081967213115
1	255315470	255588145	272675	255451807.5	2.22916666666667	11.5208333333333	2.22916666666667	13.6319444444444	2.22916666666667	9.60416666666667	0.163525216505349	0.193490054249548
1	255804707	256052234	247527	255928470.5	1.52083333333333	7.30555555555556	1.52083333333333	6.97916666666667	1.52083333333333	6	0.217910447761194	0.208174904942966
1	256052235	256057631	5396	256054933	0.479166666666666	3.65972222222222	0.479166666666666	8.81944444444445	0.479166666666666	3.0625	0.0543307086614172	0.130929791271347
1	256134360	256141949	7589	256138154.5	1.25	9.47222222222222	1.25	5.41666666666667	1.25	8.66666666666667	0.23076923076923	0.131964809384164
1	256342067	256348303	6236	256345185	0.145833333333334	8.18055555555556	0.145833333333334	10.1527777777778	0.145833333333334	7.45833333333333	0.0143638850889194	0.0178268251273345
1	256348305	256349316	1011	256348810.5	2.58333333333333	4.4375	2.58333333333333	8.19444444444444	2.58333333333333	3.89583333333333	0.315254237288135	0.582159624413145
1	256349353	256397845	48492	256373599	3.58333333333333	12.0833333333333	3.58333333333333	10.0277777777778	3.58333333333333	10.4166666666667	0.357340720221606	0.296551724137931
1	256397877	256516569	118692	256457223	6.3125	21.75	6.3125	17.4930555555556	6.3125	21.2916666666667	0.360857483128225	0.290229885057471
1	256516601	256622423	105822	256569512	2.70833333333333	15.8541666666667	2.70833333333333	14.7222222222222	2.70833333333333	15.4166666666667	0.183962264150943	0.170827858081472
1	256622514	256751014	128500	256686764	0.500000000000002	11.7986111111111	0.500000000000002	15.0416666666667	0.500000000000002	9.97916666666667	0.033240997229917	0.042377869334903
1	256751031	256911640	160609	256831335.5	1.66666666666667	35	1.66666666666667	13.25	1.66666666666667	35	0.125786163522013	0.0476190476190476
1	257515951	257703937	187986	257609944	4.18749999999999	12.8125	4.18749999999999	12.5625	4.18749999999999	12.4583333333333	0.333333333333333	0.326829268292682
1	257703945	257797184	93239	257750564.5	1.95833333333334	13.0902777777778	1.95833333333334	13.375	1.95833333333334	13.0625	0.146417445482866	0.149602122015915
1	258054888	258064845	9957	258059866.5	1.60416666666666	13.4444444444444	1.60416666666666	13.0763888888889	1.60416666666666	12.8333333333333	0.12267657992565	0.119318181818182
1	258432457	258433927	1470	258433192	0.583333333333334	1.32638888888889	0.583333333333334	12.3472222222222	0.583333333333334	0.9375	0.047244094488189	0.43979057591623
1	258433938	258502248	68310	258468093	0.749999999999999	11.9166666666667	0.749999999999999	12.6111111111111	0.749999999999999	10.5	0.0594713656387664	0.0629370629370628
1	258502462	258579103	76641	258540782.5	2.54166666666666	13.7916666666667	2.54166666666666	11.375	2.54166666666666	13.1458333333333	0.223443223443223	0.18429003021148
1	258579106	258675229	96123	258627167.5	1.70833333333333	21.5416666666667	1.70833333333333	10.8472222222222	1.70833333333333	21.1666666666667	0.157490396927017	0.0793036750483559
1	259278454	259362543	84089	259320498.5	1.20833333333333	12.6458333333333	1.20833333333333	12.7638888888889	1.20833333333333	11.8333333333333	0.0946681175190425	0.0955518945634268
1	259438447	259597072	158625	259517759.5	3.75	13.3472222222222	3.75	15.5277777777778	3.75	12.6666666666667	0.241502683363148	0.28095733610822
1	259597112	259834699	237587	259715905.5	2.70833333333333	7.47916666666668	2.70833333333333	8.58333333333333	2.70833333333333	2.0625	0.315533980582524	0.362116991643453
1	259835312	259860779	25467	259848045.5	0.666666666666667	9.59722222222223	0.666666666666667	11.8055555555556	0.666666666666667	8.58333333333334	0.0564705882352941	0.0694645441389291
1	259860785	259990958	130173	259925871.5	9.16666666666668	34.6388888888889	9.16666666666668	14.0833333333333	9.16666666666668	34	0.650887573964497	0.264635124298316
1	259991086	260195803	204717	260093444.5	5.25000000000001	29.0902777777778	5.25000000000001	10.1388888888889	5.25000000000001	28.625	0.517808219178083	0.18047266650752
1	260196168	260218528	22360	260207348	3.77083333333333	14.2638888888889	3.77083333333333	14.4097222222222	3.77083333333333	11.8333333333333	0.261686746987952	0.264362220058423
1	260218564	260424066	205502	260321315	1	10.6944444444444	1	10.875	1	9.22916666666667	0.0919540229885059	0.0935064935064937
1	260959957	261026188	66231	260993072.5	4.04166666666666	12.5902777777778	4.04166666666666	13.1666666666667	4.04166666666666	8.85416666666667	0.306962025316455	0.321014892443464
1	261026241	261168105	141864	261097173	0.583333333333331	7.78472222222222	0.583333333333331	9.96180555555556	0.583333333333331	7.5	0.0585569884977342	0.0749330954504904
1	261454526	261680284	225758	261567405	1.47916666666667	11.0902777777778	1.47916666666667	10.7986111111111	1.47916666666667	10.8541666666667	0.136977491961415	0.13337507827176
1	261680339	262099442	419103	261889890.5	2.85416666666667	14.5	2.85416666666667	8.89583333333334	2.85416666666667	14.1041666666667	0.320843091334895	0.19683908045977
1	262099757	262224611	124854	262162184	2.125	11.0416666666667	2.125	11.9097222222222	2.125	9.60416666666667	0.178425655976677	0.192452830188679
1	262267089	262355425	88336	262311257	5.75	15.3125	5.75	15.0416666666667	5.75	14.4375	0.382271468144045	0.375510204081633
1	262356649	262456648	99999	262406648.5	0.583333333333334	19.3472222222222	0.583333333333334	16.4444444444444	0.583333333333334	18.9375	0.035472972972973	0.0301507537688442
1	262479035	262506788	27753	262492911.5	2.29166666666667	12.5416666666667	2.29166666666667	12.0555555555556	2.29166666666667	11.3958333333333	0.190092165898617	0.182724252491694
1	262518491	262565720	47229	262542105.5	0.645833333333332	9.86111111111112	0.645833333333332	8.90277777777778	0.645833333333332	8.4375	0.0725429017160685	0.0654929577464787
1	262608039	262679498	71459	262643768.5	0.541666666666665	9.20833333333334	0.541666666666665	11.1944444444444	0.541666666666665	7.79166666666667	0.0483870967741934	0.0588235294117645
1	262679726	262782559	102833	262731142.5	0.416666666666656	27.4652777777778	0.416666666666656	13.3472222222222	0.416666666666656	27.1875	0.0312174817898015	0.0151706700379263
1	262790243	262931488	141245	262860865.5	9.375	25.4513888888889	9.375	16.7638888888889	9.375	24.5625	0.55923777961889	0.368349249658936
1	262933302	263064364	131062	262998833	5.16666666666667	14.7777777777778	5.16666666666667	10.0555555555556	5.16666666666667	14.2083333333333	0.513812154696133	0.349624060150376
1	263128639	263210093	81454	263169366	7.58333333333333	31.1111111111111	7.58333333333333	14.8194444444444	7.58333333333333	31	0.511715089034677	0.24375
1	263210102	263217985	7883	263214043.5	1.24999999999999	13.1527777777778	1.24999999999999	14.75	1.24999999999999	10.625	0.084745762711864	0.0950369588173173
1	263217996	263273495	55499	263245745.5	3.25	11.2430555555556	3.25	15.7083333333333	3.25	9.9375	0.206896551724138	0.289067325509574
1	263454608	263712216	257608	263583412	0.0833333333333317	10.7013888888889	0.0833333333333317	13.4861111111111	0.0833333333333317	8.89583333333333	0.0061791967044283	0.00778715120051899
1	263712220	263807426	95206	263759823	3.39583333333333	13.0069444444444	3.39583333333333	11.9236111111111	3.39583333333333	12.0625	0.284799068142108	0.261078483715963
1	264166526	264288119	121593	264227322.5	1.72916666666667	12.0486111111111	1.72916666666667	14.6736111111111	1.72916666666667	10.75	0.117841930903928	0.143515850144092
1	264288410	264583190	294780	264435800	0.562500000000003	12.8541666666667	0.562500000000003	17.3402777777778	0.562500000000003	10.8958333333333	0.0324389267120547	0.0437601296596437
1	264594337	264660971	66634	264627654	6.54166666666667	23.1666666666667	6.54166666666667	16.9583333333333	6.54166666666667	22	0.385749385749386	0.282374100719424
1	264816499	264825102	8603	264820800.5	12.2083333333333	29.7013888888889	12.2083333333333	18.9305555555556	12.2083333333333	29.3125	0.64490095377843	0.4110357727379
1	264922065	264933558	11493	264927811.5	0.645833333333333	8.52083333333333	0.645833333333333	12.8194444444444	0.645833333333333	7.77083333333333	0.0503791982665222	0.0757946210268948
1	264933637	265022897	89260	264978267	2.97916666666666	19.0902777777778	2.97916666666666	15	2.97916666666666	17.875	0.198611111111111	0.15605674790833
1	265514289	265771309	257020	265642799	6.04166666666667	25.3055555555556	6.04166666666667	13.1111111111111	6.04166666666667	23.9791666666667	0.460805084745763	0.238748627881449
1	265988254	266157777	169523	266073015.5	1	16.3402777777778	1	13.5277777777778	1	8.6875	0.0739219712525668	0.0611984700382491
1	266157786	266230626	72840	266194206	12.375	22.2986111111111	12.375	17.1805555555556	12.375	13.0208333333333	0.720291026677445	0.554967299906571
1	266230641	266234175	3534	266232408	0.645833333333335	4.77777777777778	0.645833333333335	11.4722222222222	0.645833333333335	3.58333333333334	0.0562953995157386	0.135174418604651
1	266234309	266237090	2781	266235699.5	0.979166666666666	3.6875	0.979166666666666	9.08333333333333	0.979166666666666	2.39583333333333	0.107798165137615	0.265536723163842
1	266378146	266543800	165654	266460973	3.08333333333333	7.80555555555555	3.08333333333333	9.88888888888889	3.08333333333333	6.04166666666667	0.311797752808989	0.395017793594306
1	266543807	266822924	279117	266683365.5	5.64583333333333	9.05555555555556	5.64583333333333	11.6111111111111	5.64583333333333	7.16666666666667	0.486244019138756	0.623466257668712
1	267071319	267080270	8951	267075794.5	2.0625	13.3472222222222	2.0625	7.54166666666667	2.0625	13.0833333333333	0.273480662983425	0.154526534859521
1	267081772	267117009	35237	267099390.5	2.35416666666667	7.48611111111111	2.35416666666667	8.74305555555556	2.35416666666667	6.04166666666667	0.269261318506751	0.314471243042671
1	267117011	267143265	26254	267130138	2.89583333333334	14.125	2.89583333333334	8.71527777777778	2.89583333333334	13.7916666666667	0.332270916334662	0.205014749262537
1	267143617	267193958	50341	267168787.5	4.89583333333333	11.0833333333333	4.89583333333333	10.0347222222222	4.89583333333333	10.2916666666667	0.487889273356401	0.441729323308271
1	267193962	267404788	210826	267299375	4.04166666666667	17.8611111111111	4.04166666666667	16.6388888888889	4.04166666666667	17.7708333333333	0.242904841402337	0.226283048211509
1	267404794	267456886	52092	267430840	5.8125	11.7708333333333	5.8125	11.7222222222222	5.8125	10.5	0.495853080568721	0.493805309734514
1	267564379	267566326	1947	267565352.5	1.08333333333333	2.40277777777778	1.08333333333333	11.2916666666667	1.08333333333333	1.5	0.0959409594095942	0.450867052023122
1	267566336	267599615	33279	267582975.5	0.916666666666667	4.68055555555556	0.916666666666667	9.41666666666667	0.916666666666667	4.02083333333333	0.0973451327433628	0.195845697329377
1	267982754	267985719	2965	267984236.5	1.20833333333333	9.29861111111111	1.20833333333333	7.79166666666667	1.20833333333333	8	0.155080213903743	0.129947722180732
1	267992869	268032456	39587	268012662.5	0.875	10.375	0.875	6.375	0.875	9.91666666666667	0.137254901960784	0.0843373493975903
1	268238218	268321290	83072	268279754	7.91666666666667	36.6805555555556	7.91666666666667	14.7916666666667	7.91666666666667	36.2916666666667	0.535211267605634	0.215827338129496
1	268321326	268404065	82739	268362695.5	4.85416666666667	24.2638888888889	4.85416666666667	17.3333333333333	4.85416666666667	23.4375	0.280048076923077	0.200057240984545
1	268404193	268625869	221676	268515031	4.125	20.5694444444444	4.125	11.6944444444444	4.125	19.5625	0.352731591448931	0.200540175557056
1	268626004	268628722	2718	268627363	2.125	4.75694444444444	2.125	12.1666666666667	2.125	4.27083333333333	0.174657534246575	0.446715328467154
1	268628749	268662526	33777	268645637.5	2.875	24.375	2.875	13.6388888888889	2.875	24.375	0.210794297352342	0.117948717948718
1	268677422	268944624	267202	268811023	4.66666666666667	15.2361111111111	4.66666666666667	11.4166666666667	4.66666666666667	13.125	0.408759124087591	0.306289881494987
1	268944837	269094129	149292	269019483	4.29166666666667	14.8958333333333	4.29166666666667	15.6944444444444	4.29166666666667	14.4166666666667	0.273451327433629	0.288111888111888
1	269094210	269177262	83052	269135736	4.33333333333333	23.7847222222222	4.33333333333333	15.1805555555556	4.33333333333333	23.5625	0.285452881976212	0.182189781021898
1	269314869	269368003	53134	269341436	2.08333333333333	12.4097222222222	2.08333333333333	11.7638888888889	2.08333333333333	10.9791666666667	0.177095631641086	0.167879127028539
1	269390952	269574222	183270	269482587	5.64583333333333	17.4583333333333	5.64583333333333	14.1736111111111	5.64583333333333	17.0416666666667	0.398334149926506	0.323389021479713
1	269574231	269887723	313492	269730977	7.97916666666667	19.4027777777778	7.97916666666667	18.1666666666667	7.97916666666667	16.5208333333333	0.439220183486238	0.411238367931281
1	269887734	269997536	109802	269942635	6.16666666666667	15.8541666666667	6.16666666666667	20.7638888888889	6.16666666666667	14.7708333333333	0.296989966555184	0.388961892247043
1	270094647	270194720	100073	270144683.5	5.16666666666666	23.9166666666667	5.16666666666666	18.0555555555556	5.16666666666666	22.9791666666667	0.286153846153846	0.21602787456446
1	270194937	270204031	9094	270199484	4.52083333333333	14.2083333333333	4.52083333333333	15.2152777777778	4.52083333333333	13.8125	0.297124600638978	0.318181818181818
1	270204076	270324332	120256	270264204	7.20833333333333	24.7777777777778	7.20833333333333	16.9583333333333	7.20833333333333	24.2916666666667	0.425061425061425	0.290919282511211
1	270324636	270481034	156398	270402835	8.22916666666666	27.6111111111111	8.22916666666666	18.5833333333333	8.22916666666666	27.0625	0.442825112107623	0.298038229376257
1	270575493	270670875	95382	270623184	1.4375	9.45138888888889	1.4375	9.45138888888889	1.4375	9.58333333333333	0.152094048493754	0.152094048493754
1	270671178	270727751	56573	270699464.5	2.54166666666666	12.3541666666667	2.54166666666666	15.4027777777778	2.54166666666666	11.7708333333333	0.165013525698828	0.205733558178752
1	270727811	270896480	168669	270812145.5	2.875	9.98611111111111	2.875	10.875	2.875	7.6875	0.264367816091954	0.287899860917942
1	271019702	271070610	50908	271045156	1.91666666666667	14.0138888888889	1.91666666666667	9.34722222222222	1.91666666666667	13.5833333333333	0.205052005943537	0.136769078295342
1	271070624	271084442	13818	271077533	3.3125	14.0902777777778	3.3125	8.41666666666667	3.3125	13.0625	0.393564356435644	0.235091177920158
1	271814366	272041498	227132	271927932	7.33333333333333	21.1805555555556	7.33333333333333	13.7361111111111	7.33333333333333	20.1458333333333	0.533872598584428	0.346229508196721
1	272041512	272048706	7194	272045109	0.791666666666667	4.42361111111111	0.791666666666667	9.29166666666667	0.791666666666667	2.72916666666667	0.0852017937219731	0.178963893249608
1	272048730	272049563	833	272049146.5	3.20833333333333	5	3.20833333333333	8.875	3.20833333333333	4.3125	0.36150234741784	0.641666666666667
1	272049576	272102852	53276	272076214	1.89583333333334	6.11805555555555	1.89583333333334	9.16666666666667	1.89583333333334	5.8125	0.206818181818182	0.309875141884223
1	272176113	272282668	106555	272229390.5	0.687500000000002	17.1944444444444	0.687500000000002	12.5763888888889	0.687500000000002	16.6875	0.0546659304251796	0.0399838449111471
1	272522187	272711214	189027	272616700.5	5.31249999999999	19.9444444444444	5.31249999999999	10.1597222222222	5.31249999999999	19.8958333333333	0.522898154477101	0.266364902506963
1	272711422	272863531	152109	272787476.5	5.3125	22.5694444444444	5.3125	20.8958333333333	5.3125	21.75	0.254237288135593	0.235384615384615
1	273441389	273516337	74948	273478863	3.58333333333333	10.6458333333333	3.58333333333333	12.375	3.58333333333333	9.14583333333333	0.28956228956229	0.336594911937378
1	273516371	273741620	225249	273628995.5	5.12500000000001	7.86805555555557	5.12500000000001	8.06250000000001	5.12500000000001	7.14583333333334	0.635658914728682	0.651368049426302
1	273744440	273753057	8617	273748748.5	4.33333333333333	16.0763888888889	4.33333333333333	8.32638888888889	4.33333333333333	15.6041666666667	0.520433694745621	0.269546436285097
1	274053386	274157709	104323	274105547.5	2.85416666666667	8.88888888888889	2.85416666666667	6.90972222222222	2.85416666666667	7.35416666666667	0.413065326633166	0.32109375
1	274563903	274778284	214381	274671093.5	2.625	13.8472222222222	2.625	16.8194444444444	2.625	10.7291666666667	0.15606936416185	0.189568706118355
1	274778292	274796756	18464	274787524	0.125000000000002	11.0555555555556	0.125000000000002	12.0972222222222	0.125000000000002	8.875	0.0103329506314582	0.0113065326633167
1	274796989	275003649	206660	274900319	0.895833333333332	12.2986111111111	0.895833333333332	12.3680555555556	0.895833333333332	11.2291666666667	0.0724312184166197	0.0728402032749857
1	275052250	275058037	5787	275055143.5	4.625	13.6597222222222	4.625	11.1805555555556	4.625	13.3541666666667	0.413664596273292	0.338586680223691
1	275058038	275115155	57117	275086596.5	0.708333333333332	11.0069444444444	0.708333333333332	13.2916666666667	0.708333333333332	10.7916666666667	0.0532915360501566	0.064353312302839
1	275115212	275288570	173358	275201891	1.125	14.1666666666667	1.125	16.3194444444444	1.125	12.875	0.068936170212766	0.0794117647058824
1	275759661	275847353	87692	275803507	1.9375	18.1736111111111	1.9375	15.4375	1.9375	17.7291666666667	0.125506072874494	0.106610622850592
1	276047904	276179317	131413	276113610.5	1.52083333333333	15.7638888888889	1.52083333333333	11.875	1.52083333333333	15.2708333333333	0.128070175438596	0.0964757709251099
1	276179548	276189441	9893	276184494.5	3.33333333333333	13.3958333333333	3.33333333333333	15.375	3.33333333333333	12.7291666666667	0.21680216802168	0.248833592534992
1	276189499	276233184	43685	276211341.5	1.35416666666667	3.75694444444445	1.35416666666667	9.84027777777777	1.35416666666667	1.33333333333334	0.137614678899083	0.360443622920517
1	276284010	276329739	45729	276306874.5	0.458333333333331	20.1458333333333	0.458333333333331	10.6805555555556	0.458333333333331	19.5833333333333	0.0429128738621584	0.0227507755946224
1	276329741	276406812	77071	276368276.5	0.875	11.7361111111111	0.875	12.2083333333333	0.875	11.375	0.0716723549488054	0.0745562130177514
1	276553949	276741299	187350	276647624	1.08333333333334	6.51388888888889	1.08333333333334	5.80555555555556	1.08333333333334	5.27083333333333	0.186602870813397	0.166311300639659
1	276741361	276744672	3311	276743016.5	1.41666666666667	4.86111111111111	1.41666666666667	7.47222222222222	1.41666666666667	2.52083333333333	0.189591078066915	0.291428571428572
1	276746019	276763931	17912	276754975	5.14583333333333	13.9652777777778	5.14583333333333	11.8541666666667	5.14583333333333	12.0416666666667	0.434094903339192	0.368473396320239
1	276880872	277046325	165453	276963598.5	2.08333333333333	8.99305555555556	2.08333333333333	12.6388888888889	2.08333333333333	7.79166666666667	0.164835164835165	0.231660231660231
1	277208305	277281033	72728	277244669	4.45833333333334	28.2361111111111	4.45833333333334	8.2638888888889	4.45833333333334	27.9375	0.539495798319328	0.157894736842106
1	277285786	277332680	46894	277309233	3.25	16.0347222222222	3.25	7.45833333333334	3.25	15.8333333333333	0.435754189944134	0.202685145084452
1	277332702	277387323	54621	277360012.5	1.54166666666667	7.68055555555555	1.54166666666667	5.33333333333333	1.54166666666667	6.79166666666667	0.2890625	0.200723327305606
1	277562509	277569962	7453	277566235.5	0.875000000000001	8.0625	0.875000000000001	10.7777777777778	0.875000000000001	7.60416666666667	0.0811855670103094	0.108527131782946
1	277627918	277668964	41046	277648441	1.20833333333333	10.1180555555556	1.20833333333333	11.1527777777778	1.20833333333333	8.625	0.108343711083437	0.119423472889499
1	277669069	277863775	194706	277766422	0.16666666666667	16.4305555555556	0.16666666666667	11.9861111111111	0.16666666666667	16.0833333333333	0.013904982618772	0.010143702451395
1	277916696	278091332	174636	278004014	1.66666666666667	19.0416666666667	1.66666666666667	17.4166666666667	1.66666666666667	18.9166666666667	0.0956937799043064	0.0875273522975932
1	278091351	278119802	28451	278105576.5	2.54166666666667	8.76388888888889	2.54166666666667	12.6527777777778	2.54166666666667	7.89583333333334	0.200878155872667	0.290015847860539
1	278120046	278233402	113356	278176724	7.375	16.3541666666667	7.375	17.2222222222222	7.375	14.6458333333333	0.428225806451613	0.450955414012739
1	278233433	278244947	11514	278239190	2.58333333333333	13.7222222222222	2.58333333333333	12.2083333333333	2.58333333333333	13.375	0.21160409556314	0.188259109311741
1	278257279	278576384	319105	278416831.5	4.625	17.1666666666667	4.625	11.0277777777778	4.625	17.1666666666667	0.419395465994962	0.269417475728155
1	278576427	278586018	9591	278581222.5	6.08333333333334	11.9722222222222	6.08333333333334	12.3333333333333	6.08333333333334	11.4166666666667	0.493243243243243	0.508120649651972
1	278586028	278614683	28655	278600355.5	8.85416666666667	15.5972222222222	8.85416666666667	10.6458333333333	8.85416666666667	14.8958333333333	0.831702544031311	0.567675868210152
1	278615848	278675401	59553	278645624.5	2.08333333333333	12.0763888888889	2.08333333333333	11	2.08333333333333	11.4791666666667	0.189393939393939	0.172512938470385
1	278675416	278713235	37819	278694325.5	9.39583333333333	13.1527777777778	9.39583333333333	14.3055555555556	9.39583333333333	10.8541666666667	0.656796116504854	0.714361140443506
1	278713261	278732919	19658	278723090	8.64583333333333	12.6041666666667	8.64583333333333	15.75	8.64583333333333	11.1041666666667	0.548941798941799	0.68595041322314
1	278804078	278836737	32659	278820407.5	4.60416666666666	13.9861111111111	4.60416666666666	14.6875	4.60416666666666	13.125	0.313475177304964	0.329195630585898
1	278836739	278924960	88221	278880849.5	7.125	16.7986111111111	7.125	13.625	7.125	16.75	0.522935779816514	0.42414220752377
1	279469079	279489487	20408	279479283	1.375	8.84722222222223	1.375	12.7222222222222	1.375	7.375	0.108078602620087	0.15541601255887
1	279489807	279625403	135596	279557605	6.45833333333333	18.4652777777778	6.45833333333333	14.625	6.45833333333333	15.8541666666667	0.441595441595441	0.349755547198195
1	279625482	279691004	65522	279658243	0.291666666666663	13.2013888888889	0.291666666666663	14.5486111111111	0.291666666666663	12.4791666666667	0.0200477326968971	0.0220936349289844
1	279691005	279826281	135276	279758643	0.41666666666667	16	0.41666666666667	15.9861111111111	0.41666666666667	15.4166666666667	0.0260642919200697	0.0260416666666669
1	279949221	279975281	26060	279962251	0.770833333333335	7.00694444444445	0.770833333333335	12.4722222222222	0.770833333333335	6.52083333333333	0.0618040089086861	0.110009910802775
1	279975368	280155095	179727	280065231.5	3.4375	12.8125	3.4375	9.72916666666667	3.4375	11.6875	0.353319057815846	0.268292682926829
1	280155188	280227503	72315	280191345.5	3.97916666666667	23.4305555555556	3.97916666666667	12.6944444444444	3.97916666666667	23.1041666666667	0.313457330415755	0.16982809721399
1	280227516	280231260	3744	280229388	1.875	3.18055555555555	1.875	5.69444444444444	1.875	2.20833333333333	0.329268292682927	0.589519650655022
1	280231371	280270627	39256	280250999	3.66666666666667	21.6111111111111	3.66666666666667	13.4722222222222	3.66666666666667	19.9583333333333	0.272164948453608	0.169665809768638
1	280270916	280363692	92776	280317304	1.70833333333333	19.4513888888889	1.70833333333333	11.3194444444444	1.70833333333333	18.5625	0.150920245398773	0.0878257765083898
1	280363805	280536647	172842	280450226	3.125	9.97916666666667	3.125	9.86805555555556	3.125	9.625	0.316678395496129	0.313152400835073
1	280536665	280642875	106210	280589770	1.4375	15.2777777777778	1.4375	14.4652777777778	1.4375	13.2708333333333	0.0993759001440231	0.094090909090909
1	280752244	280770915	18671	280761579.5	2.29166666666667	8.29166666666667	2.29166666666667	11.875	2.29166666666667	5.85416666666667	0.192982456140351	0.276381909547738
1	280770925	280777479	6554	280774202	1.125	8.61805555555556	1.125	12.9791666666667	1.125	6.9375	0.0866773675762441	0.130539887187752
1	280777485	280816824	39339	280797154.5	0.25	11.4722222222222	0.25	14.0972222222222	0.25	10.625	0.0177339901477833	0.0217917675544794
1	281044029	281140337	96308	281092183	6.79166666666667	19.2916666666667	6.79166666666667	15.2638888888889	6.79166666666667	17.6041666666667	0.444949954504095	0.352051835853132
1	281390837	281595742	204905	281493289.5	4.66666666666667	16.0833333333333	4.66666666666667	13.7777777777778	4.66666666666667	14.9583333333333	0.338709677419355	0.290155440414508
1	281595945	281725552	129607	281660748.5	1.5	10.0694444444444	1.5	13.5069444444444	1.5	8.25	0.111053984575835	0.148965517241379
1	281725902	281899779	173877	281812840.5	1.77083333333333	14.3055555555556	1.77083333333333	16.4513888888889	1.77083333333333	13.3541666666667	0.107640354579992	0.12378640776699
1	281931569	281963950	32381	281947759.5	6.66666666666667	21.7013888888889	6.66666666666667	18.2361111111111	6.66666666666667	18.7708333333333	0.365575019040366	0.3072
1	281964082	282531580	567498	282247831	5.95833333333333	21.6319444444444	5.95833333333333	15.6527777777778	5.95833333333333	20.2083333333333	0.380656610470275	0.275441412520064
1	282596936	282598379	1443	282597657.5	0.541666666666668	2.86805555555556	0.541666666666668	9.93055555555556	0.541666666666668	1.14583333333334	0.0545454545454547	0.188861985472155
1	282606102	282746596	140494	282676349	10.2916666666667	22.4097222222222	10.2916666666667	16.2777777777778	10.2916666666667	22.0625	0.632252559726962	0.459250077471335
1	282747092	282834818	87726	282790955	6.625	27.3888888888889	6.625	19.9722222222222	6.625	27.1875	0.331710709318498	0.241886409736308
1	282966312	282971759	5447	282969035.5	0.874999999999998	5.41666666666667	0.874999999999998	12.3333333333333	0.874999999999998	4.64583333333333	0.0709459459459458	0.161538461538461
1	282971760	283258595	286835	283115177.5	3.5	12.1388888888889	3.5	10.6527777777778	3.5	11.0833333333333	0.328552803129074	0.288329519450801
1	283258694	283321914	63220	283290304	9.125	21.0625	9.125	18.75	9.125	16.0833333333333	0.486666666666667	0.433234421364985
1	283425786	283489436	63650	283457611	0.979166666666666	15.7916666666667	0.979166666666666	12.8541666666667	0.979166666666666	14.6458333333333	0.0761750405186385	0.0620052770448548
1	283489672	283574327	84655	283531999.5	3.375	10.0902777777778	3.375	9.06944444444444	3.375	8.875	0.372128637059724	0.334480385409498
1	283574398	283637464	63066	283605931	0.66666666666667	17.5694444444444	0.66666666666667	11.5555555555556	0.66666666666667	17.1041666666667	0.0576923076923079	0.0379446640316207
1	283726228	283831304	105076	283778766	2.14583333333333	13.0347222222222	2.14583333333333	12.9027777777778	2.14583333333333	12.1875	0.166307857911733	0.164624400639318
1	283831311	283961022	129711	283896166.5	3.52083333333333	14	3.52083333333333	14.5763888888889	3.52083333333333	12.9583333333333	0.241543592186755	0.251488095238095
1	283961088	284079797	118709	284020442.5	2.22916666666667	8.85416666666667	2.22916666666667	13.2916666666667	2.22916666666667	7.66666666666667	0.167711598746082	0.251764705882353
1	284079798	284293928	214130	284186863	3.58333333333333	11.7986111111111	3.58333333333333	8.25	3.58333333333333	10.7708333333333	0.434343434343434	0.303708063566804
1	284293978	284559162	265184	284426570	4.3125	8.5	4.3125	6.6875	4.3125	8.0625	0.644859813084112	0.507352941176471
1	284890419	285092386	201967	284991402.5	0.374999999999997	12.3541666666667	0.374999999999997	17.3055555555556	0.374999999999997	11.1458333333333	0.0216693418940608	0.0303541315345697
1	285092567	285096056	3489	285094311.5	0.208333333333333	3.71527777777778	0.208333333333333	8.76388888888889	0.208333333333333	3	0.0237717908082409	0.0560747663551401
1	285180621	285182109	1488	285181365	0.166666666666666	4.60416666666667	0.166666666666666	7.15277777777778	0.166666666666666	2.8125	0.0233009708737864	0.0361990950226244
1	285182123	285199064	16941	285190593.5	6.75	16.3194444444444	6.75	14.9305555555556	6.75	13.6041666666667	0.452093023255814	0.413617021276596
1	285208963	285287173	78210	285248068	0.25	15.7361111111111	0.25	14.1666666666667	0.25	15	0.0176470588235294	0.0158870255957634
1	285287194	285592877	305683	285440035.5	1.33333333333334	15.8541666666667	1.33333333333334	12.8194444444444	1.33333333333334	15.3541666666667	0.104008667388949	0.0840998685939554
1	285593195	285835909	242714	285714552	9.22916666666666	24.5625	9.22916666666666	15.6736111111111	9.22916666666666	23.6041666666667	0.58883473637572	0.375742154368108
1	285836083	285849897	13814	285842990	10.2916666666667	22.4375	10.2916666666667	14.1805555555556	10.2916666666667	21.4166666666667	0.725759059745348	0.458681522748375
1	286036317	286103697	67380	286070007	5.66666666666667	15.0416666666667	5.66666666666667	9.97222222222222	5.66666666666667	15.0416666666667	0.56824512534819	0.376731301939058
1	286103820	286301549	197729	286202684.5	2.125	16.5138888888889	2.125	9.75	2.125	14.6875	0.217948717948718	0.128679562657696
1	286388340	286431309	42969	286409824.5	5.125	16.4027777777778	5.125	17.5555555555556	5.125	15.875	0.291930379746835	0.312447078746825
1	286431329	286512883	81554	286472106	2.95833333333333	16.2152777777778	2.95833333333333	12.7777777777778	2.95833333333333	15.3958333333333	0.231521739130435	0.182441113490364
1	286513008	286560671	47663	286536839.5	3.79166666666667	10.2986111111111	3.79166666666667	10.4027777777778	3.79166666666667	6.58333333333334	0.364485981308411	0.368172623061362
1	286574400	286591606	17206	286583003	1.41666666666667	11.8472222222222	1.41666666666667	11.8333333333333	1.41666666666667	9.16666666666667	0.119718309859155	0.11957796014068
1	286593250	286734484	141234	286663867	1.3125	14.375	1.3125	12.1875	1.3125	12.2916666666667	0.107692307692308	0.091304347826087
1	286903099	286918046	14947	286910572.5	2.625	6.875	2.625	9.18055555555556	2.625	5.14583333333333	0.285930408472012	0.381818181818182
1	287059913	287363131	303218	287211522	0.354166666666666	12.8958333333333	0.354166666666666	13.2986111111111	0.354166666666666	12.0208333333333	0.0266318537859007	0.0274636510500807
1	287363154	287543242	180088	287453198	2.10416666666667	12.8680555555556	2.10416666666667	11.2430555555556	2.10416666666667	9.10416666666667	0.187152563310685	0.163518618456557
1	287543443	287653570	110127	287598506.5	0.958333333333334	15.1527777777778	0.958333333333334	14.4444444444444	0.958333333333334	14.7916666666667	0.0663461538461539	0.0632447296058662
1	287654138	287777229	123091	287715683.5	2.29166666666667	18.8958333333333	2.29166666666667	11.7222222222222	2.29166666666667	18.8958333333333	0.195497630331754	0.121278941565601
1	287777253	287787577	10324	287782415	3.45833333333333	18.1388888888889	3.45833333333333	13.1527777777778	3.45833333333333	17.6041666666667	0.262935586061246	0.190658499234303
1	287787627	287799031	11404	287793329	5.20833333333334	21.9236111111111	5.20833333333334	16.7361111111111	5.20833333333334	18.7291666666667	0.311203319502075	0.237567310738043
1	287825495	287960508	135013	287893001.5	0.541666666666668	4.25	0.541666666666668	6.47222222222222	0.541666666666668	2.89583333333333	0.0836909871244637	0.127450980392157
1	287960560	288144070	183510	288052315	3.75	15.2222222222222	3.75	9.80555555555556	3.75	12.8333333333333	0.38243626062323	0.246350364963504
1	288144077	288333167	189090	288238622	1.45833333333333	14.9305555555556	1.45833333333333	12.1944444444444	1.45833333333333	13.7916666666667	0.119589977220957	0.0976744186046512
1	288541493	288623666	82173	288582579.5	0.229166666666667	12.7569444444445	0.229166666666667	7.39583333333333	0.229166666666667	12.2291666666667	0.0309859154929577	0.0179640718562874
1	288747417	288812166	64749	288779791.5	0.729166666666669	11.2013888888889	0.729166666666669	12.2708333333333	0.729166666666669	10.875	0.0594227504244484	0.0650960942343461
1	288812215	288928257	116042	288870236	2.5	12.0625	2.5	12.2638888888889	2.5	11	0.203850509626274	0.207253886010363
1	288928263	288936275	8012	288932269	1.75	12.0277777777778	1.75	14.3055555555556	1.75	11.5833333333333	0.122330097087379	0.145496535796767
1	289653382	289786005	132623	289719693.5	0.916666666666667	12.1319444444444	0.916666666666667	14.6666666666667	0.916666666666667	11.9583333333333	0.0625	0.0755580995993131
1	290196670	290209164	12494	290202917	0.0833333333333309	11.0694444444444	0.0833333333333309	10.8194444444444	0.0833333333333309	9.47916666666666	0.00770218228498052	0.00752823086574633
1	290209186	290272195	63009	290240690.5	1.39583333333333	7.01388888888889	1.39583333333333	12.3263888888889	1.39583333333333	5.97916666666667	0.113239436619718	0.199009900990099
1	290339561	290367422	27861	290353491.5	5.20833333333333	13.5625	5.20833333333333	13.3333333333333	5.20833333333333	11.1666666666667	0.390625	0.384024577572965
1	290367433	290393529	26096	290380481	1.85416666666667	15.5	1.85416666666667	14.3263888888889	1.85416666666667	14.5	0.129423170140572	0.119623655913979
1	290393548	290630386	236838	290511967	0.187500000000001	10.2291666666667	0.187500000000001	12.5902777777778	0.187500000000001	9	0.0148924434638721	0.0183299389002038
1	290669000	290760288	91288	290714644	2.3125	16.4513888888889	2.3125	15.7638888888889	2.3125	15.4791666666667	0.146696035242291	0.140565639510342
1	290760343	291004587	244244	290882465	8.41666666666667	21.5138888888889	8.41666666666667	17.0833333333333	8.41666666666667	21.0416666666667	0.492682926829269	0.391220142027114
1	291005794	291034506	28712	291020150	1.29166666666667	15.0347222222222	1.29166666666667	11.1527777777778	1.29166666666667	14.125	0.115815691158157	0.0859122401847575
1	291058741	291164403	105662	291111572	2.72916666666667	10.7777777777778	2.72916666666667	8.76388888888889	2.72916666666667	10.7291666666667	0.311410459587956	0.253221649484536
1	291164423	291328147	163724	291246285	1.45833333333333	11.9305555555556	1.45833333333333	11.0416666666667	1.45833333333333	11.3125	0.132075471698113	0.122235157159488
1	291328322	291547520	219198	291437921	3.5	11.4027777777778	3.5	13.8888888888889	3.5	11.2916666666667	0.252	0.30694275274056
1	291547523	291623068	75545	291585295.5	1.375	10.5347222222222	1.375	12.3194444444444	1.375	6.14583333333333	0.111612175873732	0.130520764667106
1	291731585	291801303	69718	291766444	1.875	6.18055555555555	1.875	7.08333333333333	1.875	3.8125	0.264705882352941	0.303370786516854
1	291981313	292179249	197936	292080281	0.916666666666667	11.2222222222222	0.916666666666667	11.6111111111111	0.916666666666667	10.1458333333333	0.0789473684210526	0.0816831683168317
1	292484008	292489537	5529	292486772.5	1.45833333333333	2.36111111111111	1.45833333333333	8.04166666666666	1.45833333333333	1.72916666666667	0.181347150259068	0.617647058823529
1	292746415	292784690	38275	292765552.5	0.187500000000001	1.28472222222222	0.187500000000001	4.67361111111111	0.187500000000001	-0.958333333333332	0.0401188707280834	0.145945945945947
1	292784732	292957503	172771	292871117.5	4.47916666666667	8.75	4.47916666666667	7.75694444444445	4.47916666666667	5.6875	0.577439570277529	0.511904761904762
1	293212464	293219285	6821	293215874.5	0.458333333333336	7.11805555555556	0.458333333333336	12	0.458333333333336	6.64583333333334	0.0381944444444447	0.0643902439024393
1	293219819	293224359	4540	293222089	3.10416666666667	11.4027777777778	3.10416666666667	12	3.10416666666667	11.2083333333333	0.258680555555556	0.272228989037759
1	293224510	293300206	75696	293262358	0.708333333333333	10.6111111111111	0.708333333333333	12.0138888888889	0.708333333333333	10.5	0.0589595375722543	0.0667539267015707
1	293300209	293351032	50823	293325620.5	1.33333333333333	7.36111111111112	1.33333333333333	13.3472222222222	1.33333333333333	7.16666666666667	0.0998959417273672	0.181132075471698
1	293351051	293532503	181452	293441777	0.187500000000001	10.6805555555556	0.187500000000001	9.42361111111111	0.187500000000001	8.66666666666667	0.0198968312453943	0.0175552665799741
1	293685913	293701560	15647	293693736.5	1.25	12.4861111111111	1.25	11.0277777777778	1.25	11.0833333333333	0.113350125944584	0.100111234705228
1	293701671	293719190	17519	293710430.5	0.125	6.94444444444445	0.125	9.25000000000001	0.125	6.27083333333333	0.0135135135135135	0.0179999999999999
1	293719195	293785692	66497	293752443.5	0.666666666666667	10.9722222222222	0.666666666666667	11.6666666666667	0.666666666666667	9.91666666666667	0.0571428571428571	0.0607594936708861
1	293868622	293872656	4034	293870639	4.45833333333333	10.9236111111111	4.45833333333333	12.0138888888889	4.45833333333333	9.45833333333333	0.371098265895954	0.408137317228226
1	294124897	294206939	82042	294165918	2.95833333333333	9.45138888888889	2.95833333333333	13.0138888888889	2.95833333333333	8.5625	0.227321237993597	0.313005143277002
1	294795532	294899460	103928	294847496	0.250000000000002	6.67361111111111	0.250000000000002	9.31944444444444	0.250000000000002	5.375	0.0268256333830106	0.037460978147763
1	294979842	295081482	101640	295030662	2.60416666666667	11.7569444444444	2.60416666666667	11.7222222222222	2.60416666666667	11.3125	0.222156398104266	0.221500295333727
1	295081631	295147023	65392	295114327	5.0625	12.9305555555556	5.0625	13.5277777777778	5.0625	12.5416666666667	0.374229979466119	0.391514500537057
1	295147103	295154777	7674	295150940	1.89583333333333	10.3958333333333	1.89583333333333	9.80555555555556	1.89583333333333	9.41666666666667	0.193342776203966	0.182364729458918
1	295154792	295349693	194901	295252242.5	5.54166666666667	16.7361111111111	5.54166666666667	11.1527777777778	5.54166666666667	16.3958333333333	0.496886674968867	0.331120331950208
1	295449410	295530589	81179	295489999.5	1.52083333333334	13.3194444444444	1.52083333333334	10.7777777777778	1.52083333333334	11.2083333333333	0.141108247422681	0.114181438998957
1	295535890	295561456	25566	295548673	1.64583333333333	8.28472222222222	1.64583333333333	8.72916666666666	1.64583333333333	7.41666666666667	0.18854415274463	0.198658843252305
1	295561608	295620381	58773	295590994.5	0.833333333333332	8.38194444444445	0.833333333333332	11.3333333333333	0.833333333333332	5.70833333333334	0.0735294117647058	0.0994200497100247
1	295956905	296065095	108190	296011000	2.91666666666667	13.5555555555556	2.91666666666667	12.4166666666667	2.91666666666667	10	0.23489932885906	0.215163934426229
1	296093008	296100297	7289	296096652.5	2.29166666666667	11.1875	2.29166666666667	16.7083333333333	2.29166666666667	9.83333333333334	0.13715710723192	0.204841713221601
1	296816847	296928788	111941	296872817.5	3.1875	16.375	3.1875	14.5069444444444	3.1875	15.8541666666667	0.219722355193873	0.194656488549618
1	296928838	296982764	53926	296955801	0.708333333333335	13.2708333333333	0.708333333333335	10.7083333333333	0.708333333333335	10.0416666666667	0.0661478599221792	0.0533751962323393
1	297132793	297140636	7843	297136714.5	0.729166666666664	10.2847222222222	0.729166666666664	10.6944444444444	0.729166666666664	9.04166666666667	0.0681818181818179	0.0708980418636054
1	297140682	297243623	102941	297192152.5	9.5625	19.7569444444444	9.5625	14.7430555555556	9.5625	19.6458333333333	0.648610456900612	0.484007029876977
1	297243723	297245626	1903	297244674.5	4.9375	10.2569444444444	4.9375	7.29861111111111	4.9375	9	0.676498572787821	0.481381178063643
1	297245659	297246616	957	297246137.5	6.83333333333333	14.0902777777778	6.83333333333333	7.98611111111111	6.83333333333333	12.75	0.855652173913043	0.484967964514539
1	297390440	297401848	11408	297396144	0.5	4.36805555555556	0.5	6.99305555555556	0.5	3.27083333333333	0.0714995034756703	0.114467408585056
1	297409281	297414543	5262	297411912	0.500000000000001	4.5625	0.500000000000001	7.25	0.500000000000001	4.25	0.0689655172413794	0.109589041095891
1	297430817	297431632	815	297431224.5	0.625	4.50694444444444	0.625	9.22222222222222	0.625	3.72916666666667	0.0677710843373494	0.138674884437596
1	297454913	297556853	101940	297505883	5.95833333333334	13	5.95833333333334	17.0833333333333	5.95833333333334	12.6041666666667	0.348780487804878	0.458333333333334
1	297563897	297643219	79322	297603558	3.41666666666667	10.125	3.41666666666667	13.7361111111111	3.41666666666667	7.375	0.248736097067745	0.337448559670782
1	297643281	297651107	7826	297647194	0.208333333333333	2.47916666666667	0.208333333333333	8.90277777777778	0.208333333333333	1.20833333333333	0.0234009360374415	0.0840336134453781
1	297651121	297808173	157052	297729647	1.6875	6.10416666666667	1.6875	8.18055555555556	1.6875	2.1875	0.206281833616299	0.276450511945392
1	297808177	297827559	19382	297817868	2.70833333333333	9.22222222222222	2.70833333333333	11.5833333333333	2.70833333333333	8.60416666666667	0.233812949640288	0.293674698795181
1	297827573	297836855	9282	297832214	0.708333333333334	5.94444444444445	0.708333333333334	7.22916666666667	0.708333333333334	4.625	0.0979827089337177	0.119158878504673
1	297836936	297883376	46440	297860156	1.85416666666667	14.0347222222222	1.85416666666667	10.5972222222222	1.85416666666667	11.4375	0.174967234600262	0.132112815437902
1	297883589	297946015	62426	297914802	3.5625	13.5069444444444	3.5625	7.49305555555555	3.5625	12.625	0.475440222428174	0.263753213367609
1	297946017	298054837	108820	298000427	2.33333333333334	7.85416666666667	2.33333333333334	6.63888888888889	2.33333333333334	6.4375	0.351464435146444	0.297082228116711
1	298054871	298208462	153591	298131666.5	2.14583333333333	10.2291666666667	2.14583333333333	10.1180555555556	2.14583333333333	8.91666666666667	0.212079615648593	0.209775967413442
1	298273463	298376642	103179	298325052.5	4.0625	19.2361111111111	4.0625	11.7013888888889	4.0625	16.75	0.347181008902077	0.211191335740072
1	298495737	298512593	16856	298504165	0.083333333333335	7.02777777777778	0.083333333333335	13.0833333333333	0.083333333333335	6.625	0.00636942675159249	0.0118577075098817
1	298770722	298815961	45239	298793341.5	2.89583333333333	10.8958333333333	2.89583333333333	10.6736111111111	2.89583333333333	9.3125	0.271307742355237	0.265774378585086
1	298908233	298961757	53524	298934995	0.770833333333334	11.4027777777778	0.770833333333334	11.7222222222222	0.770833333333334	9.33333333333333	0.0657582938388626	0.0676004872107187
1	299126991	299197871	70880	299162431	3.64583333333333	10.5694444444444	3.64583333333333	10.5555555555556	3.64583333333333	9.0625	0.345394736842105	0.344940867279895
1	299197882	299278575	80693	299238228.5	1.39583333333333	11.1736111111111	1.39583333333333	10.5416666666667	1.39583333333333	10.9166666666667	0.132411067193676	0.124922311995028
1	299278782	299373501	94719	299326141.5	3.29166666666667	15.9027777777778	3.29166666666667	12.0277777777778	3.29166666666667	15.2916666666667	0.273672055427252	0.206986899563319
1	299373514	299463426	89912	299418470	1.12410081243297e-15	14.0208333333333	1.12410081243297e-15	12.1666666666667	1.12410081243297e-15	13.3541666666667	9.23918475972305e-17	8.01736092077007e-17
1	299492959	299498990	6031	299495974.5	5.20833333333333	11.6458333333333	5.20833333333333	10.4861111111111	5.20833333333333	10.75	0.496688741721854	0.447227191413238
1	299532075	299544119	12044	299538097	1.5	7.97916666666666	1.5	11.0277777777778	1.5	3.85416666666667	0.136020151133501	0.187989556135771
1	299544653	299646270	101617	299595461.5	5.60416666666667	11.8055555555556	5.60416666666667	11.5416666666667	5.60416666666667	10.8125	0.485559566787004	0.474705882352941
1	299714892	299716439	1547	299715665.5	0.916666666666667	8.58333333333333	0.916666666666667	13.4166666666667	0.916666666666667	6.97916666666667	0.0683229813664597	0.106796116504854
1	299717417	299730241	12824	299723829	1.75	5.66666666666667	1.75	9.22916666666667	1.75	4.77083333333333	0.18961625282167	0.308823529411765
1	299730273	299736878	6605	299733575.5	0.479166666666666	6.22916666666667	0.479166666666666	7.75694444444445	0.479166666666666	5.375	0.0617726051924797	0.0769230769230767
1	299736899	299754458	17559	299745678.5	0.541666666666666	6.81944444444444	0.541666666666666	9.75694444444445	0.541666666666666	6.39583333333333	0.0555160142348753	0.0794297352342158
1	299774163	299783062	8899	299778612.5	0.5	3.44444444444445	0.5	6.07638888888889	0.5	1.77083333333333	0.0822857142857143	0.145161290322581
1	299827078	299902008	74930	299864543	1.625	8.79166666666668	1.625	12.0416666666667	1.625	8.12500000000001	0.134948096885813	0.184834123222749
1	299968266	300060037	91771	300014151.5	1.29166666666667	8.56944444444444	1.29166666666667	10.1736111111111	1.29166666666667	7.9375	0.126962457337884	0.150729335494328
1	300070609	300088668	18059	300079638.5	2.39583333333333	7.82638888888889	2.39583333333333	8.27083333333333	2.39583333333333	3.97916666666667	0.289672544080605	0.306122448979592
1	300146611	300190327	43716	300168469	2.95833333333333	11.7638888888889	2.95833333333333	10.1458333333333	2.95833333333333	10.8333333333333	0.291581108829569	0.251475796930342
1	300352045	300369302	17257	300360673.5	5.79166666666667	13.3263888888889	5.79166666666667	13.1666666666667	5.79166666666667	13.375	0.439873417721519	0.434601354872329
1	300369536	300460825	91289	300415180.5	1.875	6.76388888888889	1.875	12.7291666666667	1.875	5.58333333333333	0.147299509001637	0.277207392197125
1	300461659	300519677	58018	300490668	3.8125	10.2986111111111	3.8125	10.4513888888889	3.8125	8.5	0.364784053156146	0.370195549561699
1	300519733	300532108	12375	300525920.5	2.5	9.94444444444444	2.5	11.1111111111111	2.5	9.25	0.225	0.251396648044693
1	300532121	300555769	23648	300543945	3.08333333333334	6.46527777777778	3.08333333333334	8.27083333333333	3.08333333333334	5.0625	0.3727959697733	0.476906552094522
1	300948590	301086950	138360	301017770	1.45833333333333	5.60416666666667	1.45833333333333	5.84722222222222	1.45833333333333	3.72916666666667	0.249406175771971	0.260223048327137
1	301086954	301251557	164603	301169255.5	4.5625	7.90277777777778	4.5625	9.79861111111111	4.5625	6.75	0.465627214741318	0.577328646748682
1	301251902	301345208	93306	301298555	1.33333333333333	3.17361111111111	1.33333333333333	4.08333333333333	1.33333333333333	2.45833333333333	0.326530612244898	0.420131291028447
1	301345264	301349673	4409	301347468.5	2.45833333333333	3.77083333333333	2.45833333333333	5.69444444444445	2.45833333333333	3.5	0.431707317073171	0.651933701657459
1	301349782	301353574	3792	301351678	1	2.88888888888889	1	5.52777777777778	1	2.45833333333333	0.180904522613065	0.346153846153846
2	168934	656877	487943	412905.5	0.833333333333333	9.72222222222222	0.833333333333333	9.67361111111111	0.833333333333333	6.625	0.0861450107681263	0.0857142857142857
2	726475	728978	2503	727726.5	2.58333333333333	6.90277777777778	2.58333333333333	10.1180555555556	2.58333333333333	5.97916666666667	0.25531914893617	0.374245472837022
2	849865	902158	52293	876011.5	0.833333333333335	7.06944444444445	0.833333333333335	12.8472222222222	0.833333333333335	6	0.064864864864865	0.117878192534381
2	902340	940663	38323	921501.5	2.41666666666667	8.90972222222222	2.41666666666667	10.3888888888889	2.41666666666667	7.79166666666667	0.232620320855615	0.271239282930631
2	940967	954175	13208	947571	0.958333333333332	8.41666666666667	0.958333333333332	7.15277777777778	0.958333333333332	6.95833333333333	0.133980582524272	0.113861386138614
2	954356	1140238	185882	1047297	1.27083333333333	8.9375	1.27083333333333	9.55555555555555	1.27083333333333	8.0625	0.132994186046512	0.142191142191142
2	1140559	1212930	72371	1176744.5	2.66666666666667	20.3125	2.66666666666667	9.51388888888889	2.66666666666667	19.4791666666667	0.28029197080292	0.131282051282051
2	1358294	1464120	105826	1411207	1.83333333333333	14.2430555555556	1.83333333333333	13.5694444444444	1.83333333333333	13.6041666666667	0.13510747185261	0.128717698683569
2	1570164	1681269	111105	1625716.5	1.47916666666667	13.7083333333333	1.47916666666667	14.2430555555556	1.47916666666667	13.625	0.103851779619698	0.10790273556231
2	1681450	1724132	42682	1702791	0.375000000000001	8.27083333333334	0.375000000000001	12.7777777777778	0.375000000000001	8.10416666666667	0.0293478260869566	0.0453400503778339
2	1724295	1781787	57492	1753041	1.83333333333333	12.1458333333333	1.83333333333333	13.9027777777778	1.83333333333333	11.5833333333333	0.131868131868132	0.150943396226415
2	1781871	1823626	41755	1802748.5	6.02083333333334	15.5555555555556	6.02083333333334	10.9722222222222	6.02083333333334	15.0833333333333	0.54873417721519	0.387053571428572
2	1823987	1837294	13307	1830640.5	2.83333333333333	7.84027777777778	2.83333333333333	12.5555555555556	2.83333333333333	7.27083333333333	0.225663716814159	0.361381753764393
2	1837298	1847931	10633	1842614.5	8.64583333333333	14.875	8.64583333333333	15.9375	8.64583333333333	14.2083333333333	0.542483660130718	0.581232492997198
2	1980392	2057540	77148	2018966	1.25	10.1180555555556	1.25	12.9861111111111	1.25	8.77083333333334	0.0962566844919785	0.123541523678792
2	2099153	2117334	18181	2108243.5	9.70833333333334	17.7986111111111	9.70833333333334	17.3472222222222	9.70833333333334	17.4375	0.55964771817454	0.545454545454546
2	2117388	2228102	110714	2172745	4.70833333333333	17.3055555555556	4.70833333333333	15.2638888888889	4.70833333333333	16.8125	0.308462238398544	0.27207062600321
2	2228129	2274480	46351	2251304.5	1.8125	14.6805555555556	1.8125	11.2916666666667	1.8125	12.7916666666667	0.160516605166052	0.123462630085147
2	2274705	2276067	1362	2275386	1.35416666666667	6.8125	1.35416666666667	7.92361111111111	1.35416666666667	5.5625	0.170902716914987	0.198776758409786
2	2276076	2278414	2338	2277245	1.77083333333333	5.8125	1.77083333333333	8.50694444444445	1.77083333333333	2.83333333333333	0.208163265306122	0.304659498207885
2	2372267	2375928	3661	2374097.5	3.10416666666667	9.59027777777778	3.10416666666667	10.4652777777778	3.10416666666667	6.875	0.296615792966158	0.32367849384504
2	2409999	2544473	134474	2477236	4.83333333333333	11.875	4.83333333333333	10.8333333333333	4.83333333333333	9.25	0.446153846153846	0.407017543859649
2	2685436	2795087	109651	2740261.5	1.10416666666667	16.0486111111111	1.10416666666667	10.6875	1.10416666666667	15.3541666666667	0.103313840155946	0.0688013846819561
2	2807029	3012915	205886	2909972	3.125	10.3541666666667	3.125	13.5	3.125	8.27083333333334	0.231481481481481	0.301810865191147
2	3061673	3086222	24549	3073947.5	0.125000000000002	11.4652777777778	0.125000000000002	11.5138888888889	0.125000000000002	6.97916666666667	0.0108564535585044	0.0109024833434284
2	3086264	3112422	26158	3099343	2.125	12.1666666666667	2.125	9.09722222222222	2.125	11.4791666666667	0.233587786259542	0.174657534246575
2	3183712	3345964	162252	3264838	3.3125	12.4791666666667	3.3125	10.3958333333333	3.3125	10.5208333333333	0.318637274549098	0.265442404006678
2	3346271	3382580	36309	3364425.5	6.97916666666667	15.9097222222222	6.97916666666667	16.8611111111111	6.97916666666667	12.125	0.413920922570017	0.438673068529027
2	3410337	3419707	9370	3415022	4.64583333333333	12.8333333333333	4.64583333333333	11.4513888888889	4.64583333333333	12.1041666666667	0.405700424499697	0.362012987012987
2	3425989	3616706	190717	3521347.5	2.54166666666667	13.125	2.54166666666667	12.5833333333333	2.54166666666667	12.9583333333333	0.201986754966888	0.193650793650794
2	3616784	3674502	57718	3645643	2.52083333333334	5.25	2.52083333333334	9.375	2.52083333333334	2.83333333333334	0.268888888888889	0.48015873015873
2	3674509	3695527	21018	3685018	7.83333333333334	9.70833333333334	7.83333333333334	8.97222222222223	7.83333333333334	9.70833333333334	0.873065015479876	0.8068669527897
2	3864313	3880437	16124	3872375	0.979166666666667	10.0277777777778	0.979166666666667	10.3194444444444	0.979166666666667	9.39583333333333	0.094885598923284	0.0976454293628809
2	3949931	4046861	96930	3998396	0.25	10.9791666666667	0.25	10.3402777777778	0.25	10.7916666666667	0.0241773002014775	0.0227703984819734
2	4046884	4173399	126515	4110141.5	7.83333333333334	21.2291666666667	7.83333333333334	15.4722222222222	7.83333333333334	19.875	0.506283662477558	0.368989205103042
2	4173405	4181554	8149	4177479.5	2.75	14.9930555555556	2.75	11.0277777777778	2.75	14.3333333333333	0.249370277078085	0.183418249189439
2	4181566	4265771	84205	4223668.5	1.83333333333333	12.0277777777778	1.83333333333333	9.80555555555556	1.83333333333333	9.85416666666667	0.186968838526912	0.152424942263279
2	4309955	4357700	47745	4333827.5	0.687499999999999	10.5694444444444	0.687499999999999	14.9652777777778	0.687499999999999	9.39583333333333	0.0459396751740138	0.0650459921156372
2	4357742	4443295	85553	4400518.5	3.20833333333333	15.0069444444444	3.20833333333333	17.5138888888889	3.20833333333333	14.1666666666667	0.183187946074544	0.213789912077741
2	4443322	4586956	143634	4515139	1.375	15.0138888888889	1.375	13.1944444444444	1.375	14.0208333333333	0.104210526315789	0.0915818686401479
2	4637766	4693546	55780	4665656	3.52083333333333	12.7708333333333	3.52083333333333	11.2569444444444	3.52083333333333	10.7291666666667	0.312769895126465	0.275693311582382
2	4701983	4839810	137827	4770896.5	0.104166666666667	15.0625	0.104166666666667	13.6875	0.104166666666667	13.5833333333333	0.00761035007610356	0.00691562932226838
2	4839860	4855780	15920	4847820	0.25	12.5347222222222	0.25	13.4722222222222	0.25	11.0416666666667	0.0185567010309278	0.0199445983379501
2	4855784	4902482	46698	4879133	2.64583333333333	18.0069444444444	2.64583333333333	14.8611111111111	2.64583333333333	15.5208333333333	0.17803738317757	0.146934053220208
2	5012959	5015476	2517	5014217.5	10.625	18.9305555555556	10.625	20.2083333333333	10.625	17.375	0.525773195876289	0.561261922230375
2	5015510	5018331	2821	5016920.5	4.83333333333333	9.88194444444444	4.83333333333333	17.0277777777778	4.83333333333333	6.39583333333333	0.283849918433932	0.489107519325369
2	5018445	5053263	34818	5035854	2.1875	6.59027777777778	2.1875	11.4444444444444	2.1875	5.04166666666667	0.191140776699029	0.331928345626976
2	5054605	5056527	1922	5055566	0.520833333333333	3.31944444444444	0.520833333333333	9.20138888888889	0.520833333333333	1.89583333333333	0.0566037735849056	0.156903765690376
2	5056598	5089206	32608	5072902	2.375	13.7569444444444	2.375	11.4444444444444	2.375	13.0833333333333	0.20752427184466	0.172640080767289
2	5109494	5236714	127220	5173104	2.60416666666667	9.16666666666667	2.60416666666667	12.0416666666667	2.60416666666667	7.02083333333333	0.216262975778547	0.284090909090909
2	5236753	5385151	148398	5310952	3.8125	17.8333333333333	3.8125	15.4652777777778	3.8125	16.1875	0.246519982038617	0.213785046728972
2	5385178	5574141	188963	5479659.5	0.75	12.4652777777778	0.75	10.3263888888889	0.75	11.0416666666667	0.0726294552790854	0.06016713091922
2	5574317	5692230	117913	5633273.5	1.60416666666666	9.98611111111111	1.60416666666666	10.0694444444444	1.60416666666666	8.91666666666667	0.159310344827586	0.160639777468706
2	5692233	5695313	3080	5693773	2.58333333333334	15.3958333333333	2.58333333333334	13.8611111111111	2.58333333333334	14.5625	0.186372745490982	0.167794316644114
2	5696558	5824332	127774	5760445	3.6875	12.25	3.6875	9.09027777777778	3.6875	11.1875	0.405653170359052	0.301020408163265
2	5824385	5831817	7432	5828101	0.833333333333335	9.38888888888889	0.833333333333335	14.5	0.833333333333335	7.91666666666667	0.0574712643678162	0.0887573964497043
2	5832045	5847526	15481	5839785.5	1.08333333333333	12.7222222222222	1.08333333333333	12.0833333333333	1.08333333333333	12.25	0.089655172413793	0.0851528384279475
2	5853669	5868295	14626	5860982	10.375	18.1388888888889	10.375	18.9583333333333	10.375	16.1041666666667	0.547252747252747	0.57197549770291
2	5868475	5931732	63257	5900103.5	4.95833333333333	14.1180555555556	4.95833333333333	16.2708333333333	4.95833333333333	13.7708333333333	0.304737516005122	0.35120511559272
2	5942706	6011333	68627	5977019.5	0.25	7.74305555555556	0.25	10.8055555555556	0.25	5.375	0.0231362467866324	0.0322869955156951
2	6011384	6026116	14732	6018750	4.20833333333334	14.9097222222222	4.20833333333334	13.6111111111111	4.20833333333334	14.3541666666667	0.309183673469388	0.282254308337215
2	6026125	6039106	12981	6032615.5	0.458333333333331	8.38194444444444	0.458333333333331	13.1319444444444	0.458333333333331	7.77083333333333	0.0349021681649919	0.0546810273405135
2	6039122	6043277	4155	6041199.5	0.666666666666666	5.75	0.666666666666666	7.56944444444445	0.666666666666666	5.08333333333333	0.0880733944954128	0.115942028985507
2	6152885	6153969	1084	6153427	1.97916666666667	3.49305555555556	1.97916666666667	9.69444444444444	1.97916666666667	3.1875	0.204154727793696	0.566600397614314
2	6153973	6192814	38841	6173393.5	2.72916666666666	10.2291666666667	2.72916666666666	15.4444444444444	2.72916666666666	8.66666666666667	0.176708633093525	0.266802443991853
2	6193171	6263103	69932	6228137	2.77083333333334	21.7916666666667	2.77083333333334	9.56597222222223	2.77083333333334	21.4375	0.289655172413793	0.127151051625239
2	6263223	6265441	2218	6264332	8.79166666666667	39.7083333333333	8.79166666666667	13.3888888888889	8.79166666666667	39.7083333333333	0.656639004149378	0.221406086044071
2	6265582	6333737	68155	6299659.5	6.97916666666667	17.3125	6.97916666666667	13.0138888888889	6.97916666666667	17.25	0.536286019210246	0.403128760529483
2	6359203	6476122	116919	6417662.5	5	18.5833333333333	5	12.0555555555556	5	16.8125	0.414746543778802	0.269058295964126
2	6476153	6482001	5848	6479077	0.458333333333335	7.0625	0.458333333333335	10.1111111111111	0.458333333333335	6.375	0.0453296703296705	0.0648967551622421
2	6741044	6857466	116422	6799255	6.33333333333334	14.2013888888889	6.33333333333334	14.1111111111111	6.33333333333334	13.3541666666667	0.448818897637796	0.445965770171149
2	6981739	7004397	22658	6993068	4.1875	10.8958333333333	4.1875	9.50694444444444	4.1875	10.4166666666667	0.440467494521549	0.384321223709369
2	7187921	7207605	19684	7197763	3.47916666666667	25.4166666666667	3.47916666666667	8.625	3.47916666666667	24.7708333333333	0.403381642512078	0.136885245901639
2	7207678	7211818	4140	7209748	6.41666666666667	18.9861111111111	6.41666666666667	8.75000000000001	6.41666666666667	12.8125	0.733333333333333	0.337966349670812
2	7211964	7222809	10845	7217386.5	3.14583333333333	14.4097222222222	3.14583333333333	11.4930555555556	3.14583333333333	11.4166666666667	0.273716012084592	0.218313253012048
2	7327652	7416837	89185	7372244.5	1.58333333333333	7.02777777777778	1.58333333333333	8.59027777777778	1.58333333333333	5.6875	0.18431689571544	0.225296442687747
2	7416907	7444674	27767	7430790.5	7.45833333333333	15.4027777777778	7.45833333333333	15.8402777777778	7.45833333333333	13.8541666666667	0.470846120122753	0.484220018034265
2	7444836	7447239	2403	7446037.5	0.291666666666667	5.52083333333333	0.291666666666667	8.47222222222222	0.291666666666667	1.27083333333333	0.0344262295081967	0.0528301886792452
2	7447242	7529618	82376	7488430	1.5625	8.83333333333333	1.5625	11.3194444444444	1.5625	5.5	0.138036809815951	0.17688679245283
2	7529713	7628201	98488	7578957	0.312500000000004	8.54861111111111	0.312500000000004	9.88194444444445	0.312500000000004	6.85416666666667	0.0316233309908647	0.0365556458164099
2	7828503	7961899	133396	7895201	3.25	11.4305555555556	3.25	11.0694444444444	3.25	10.7083333333333	0.293601003764115	0.284325637910085
2	8504682	8724537	219855	8614609.5	5.70833333333334	18.5486111111111	5.70833333333334	15.0277777777778	5.70833333333334	15.3541666666667	0.379852125693161	0.307749906402097
2	8791048	8869423	78375	8830235.5	4.125	10.4722222222222	4.125	12.0972222222222	4.125	9.14583333333333	0.340987370838117	0.393899204244032
2	8869432	8902598	33166	8886015	0.666666666666668	15.2777777777778	0.666666666666668	15.1388888888889	0.666666666666668	13.9583333333333	0.0440366972477065	0.0436363636363637
2	8902657	8913891	11234	8908274	0.583333333333336	11.5486111111111	0.583333333333336	11.3888888888889	0.583333333333336	10.2708333333333	0.0512195121951222	0.0505111244738427
2	8921011	8925308	4297	8923159.5	3.95833333333333	16.0625	3.95833333333333	13.6805555555556	3.95833333333333	11.7916666666667	0.289340101522843	0.246433203631647
2	8925315	9000646	75331	8962980.5	5.5	18.9166666666667	5.5	15.9444444444444	5.5	14.3541666666667	0.344947735191638	0.290748898678414
2	9000673	9014660	13987	9007666.5	1.85416666666667	12.2222222222222	1.85416666666667	14.1180555555556	1.85416666666667	11.8958333333333	0.131333005410723	0.151704545454546
2	9023369	9117920	94551	9070644.5	1.10416666666667	12.4375	1.10416666666667	9.24305555555556	1.10416666666667	11.6875	0.119459053343351	0.0887772194304858
2	9118092	9126351	8259	9122221.5	4.29166666666667	13.0833333333333	4.29166666666667	10.6527777777778	4.29166666666667	12.7083333333333	0.402868318122556	0.328025477707006
2	9126406	9278872	152466	9202639	2.66666666666667	12.1944444444444	2.66666666666667	11.2916666666667	2.66666666666667	11.5	0.236162361623616	0.21867881548975
2	9363901	9435276	71375	9399588.5	1.97916666666667	13.9583333333333	1.97916666666667	14.2638888888889	1.97916666666667	13.4791666666667	0.138753651411879	0.141791044776119
2	9435279	9509093	73814	9472186	0.562500000000001	13.9444444444444	0.562500000000001	14.3263888888889	0.562500000000001	11.8125	0.03926320891905	0.0403386454183268
2	9556443	9923601	367158	9740022	3.6875	21.5277777777778	3.6875	14.1736111111111	3.6875	20.4375	0.260166585007349	0.171290322580645
2	9946300	9976388	30088	9961344	0.916666666666668	9.88888888888889	0.916666666666668	13.0416666666667	0.916666666666668	8.02083333333333	0.0702875399361023	0.0926966292134832
2	10017044	10150606	133562	10083825	0.208333333333336	13.0277777777778	0.208333333333336	11.5138888888889	0.208333333333336	12.2916666666667	0.018094089264174	0.015991471215352
2	10351285	10376341	25056	10363813	1.95833333333333	17.4166666666667	1.95833333333333	12.5972222222222	1.95833333333333	15.8333333333333	0.155457552370452	0.11244019138756
2	10470962	10485094	14132	10478028	3.45833333333333	14.4027777777778	3.45833333333333	15.0972222222222	3.45833333333333	13.9583333333333	0.229070837166513	0.240115718418515
2	10485200	10520052	34852	10502626	2.10416666666667	14.9097222222222	2.10416666666667	12.3611111111111	2.10416666666667	13.7916666666667	0.170224719101124	0.141127154168607
2	10564666	10605244	40578	10584955	1.75	21.6944444444444	1.75	13.3194444444444	1.75	19.2708333333333	0.131386861313869	0.0806658130601794
2	10655908	10670821	14913	10663364.5	3.04166666666667	14.0416666666667	3.04166666666667	9.59722222222222	3.04166666666667	13.625	0.316931982633864	0.216617210682493
2	10670838	10788792	117954	10729815	6.41666666666667	23.5833333333333	6.41666666666667	10.8194444444444	6.41666666666667	23.3333333333333	0.593068035943518	0.272084805653711
2	10788825	11033551	244726	10911188	1.9375	11.0972222222222	1.9375	11.9930555555556	1.9375	10.1041666666667	0.161551823972206	0.17459324155194
2	11210759	11217262	6503	11214010.5	3.95833333333333	10.4236111111111	3.95833333333333	11.3055555555556	3.95833333333333	9.22916666666667	0.35012285012285	0.379746835443038
2	11217282	11361808	144526	11289545	7.375	16.4236111111111	7.375	14.9166666666667	7.375	15.625	0.494413407821229	0.449048625792812
2	11365505	11374517	9012	11370011	3.54166666666667	14.2916666666667	3.54166666666667	11.1944444444445	3.54166666666667	11.8541666666667	0.316377171215881	0.247813411078718
2	11551170	11645846	94676	11598508	1.14583333333333	7.40972222222222	1.14583333333333	9.23611111111111	1.14583333333333	4.95833333333334	0.12406015037594	0.154639175257732
2	11645869	11653542	7673	11649705.5	5.47916666666667	14.0069444444444	5.47916666666667	12.8888888888889	5.47916666666667	8.375	0.42510775862069	0.391175012394646
2	11653575	11769402	115827	11711488.5	2.66666666666667	14.0763888888889	2.66666666666667	10.5138888888889	2.66666666666667	12.1666666666667	0.253632760898283	0.189442525900345
2	11950663	12008019	57356	11979341	0.500000000000001	9.45138888888889	0.500000000000001	12.3333333333333	0.500000000000001	6.875	0.0405405405405406	0.0529022777369582
2	12008650	12022870	14220	12015760	1.20833333333334	10.0625	1.20833333333334	10.2083333333333	1.20833333333334	8.79166666666667	0.118367346938776	0.12008281573499
2	12022896	12034823	11927	12028859.5	2.83333333333333	13.1111111111111	2.83333333333333	6.27777777777778	2.83333333333333	12.2916666666667	0.451327433628318	0.216101694915254
2	12034949	12105268	70319	12070108.5	0.208333333333336	9.86111111111111	0.208333333333336	10.4166666666667	0.208333333333336	9.20833333333334	0.0200000000000003	0.0211267605633806
2	12106095	12205290	99195	12155692.5	3.20833333333333	24.4722222222222	3.20833333333333	12.2083333333333	3.20833333333333	23.7083333333333	0.262798634812287	0.131101021566402
2	12205291	12259106	53815	12232198.5	0.166666666666669	13.7777777777778	0.166666666666669	14.2777777777778	0.166666666666669	13.0208333333333	0.0116731517509729	0.0120967741935485
2	12288198	12355890	67692	12322044	8.16666666666666	32.0972222222222	8.16666666666666	13.8194444444444	8.16666666666666	32	0.590954773869346	0.254435309389874
2	12356242	12362929	6687	12359585.5	4.02083333333333	12.8263888888889	4.02083333333333	13.3402777777778	4.02083333333333	11.1458333333333	0.301405517959396	0.31348132106118
2	12362955	12446455	83500	12404705	5.95833333333333	18.8472222222222	5.95833333333333	12.4166666666667	5.95833333333333	16.7916666666667	0.47986577181208	0.316138540899042
2	12446482	12454355	7873	12450418.5	6.25000000000001	36.6666666666667	6.25000000000001	15.1388888888889	6.25000000000001	36.6666666666667	0.412844036697248	0.170454545454546
2	12454621	12608693	154072	12531657	2.10416666666667	18.6875	2.10416666666667	13.3819444444444	2.10416666666667	17.7708333333333	0.157239231966788	0.112597547380156
2	12608702	12697272	88570	12652987	0.333333333333334	11.1736111111111	0.333333333333334	12.7638888888889	0.333333333333334	10.7291666666667	0.0261153427638739	0.0298321939092605
2	12929453	13249515	320062	13089484	1.85416666666667	6.42361111111111	1.85416666666667	6.43055555555556	1.85416666666667	3.89583333333333	0.288336933045356	0.288648648648649
2	13250462	13310233	59771	13280347.5	1.29166666666667	15.4861111111111	1.29166666666667	12.5138888888889	1.29166666666667	14.2916666666667	0.103218645948946	0.083408071748879
2	13310899	13354148	43249	13332523.5	0.25	9.70138888888889	0.25	10.1527777777778	0.25	8.29166666666667	0.024623803009576	0.0257695060844668
2	13461450	13474438	12988	13467944	0.166666666666667	7.79166666666667	0.166666666666667	10.0694444444444	0.166666666666667	6.60416666666667	0.0165517241379311	0.0213903743315509
2	13474441	13603223	128782	13538832	1.33333333333334	13	1.33333333333334	9.97222222222222	1.33333333333334	11.1666666666667	0.133704735376045	0.102564102564103
2	13660194	13786437	126243	13723315.5	3.04166666666667	11.0069444444444	3.04166666666667	13.3888888888889	3.04166666666667	10.6875	0.227178423236515	0.276340694006309
2	13787378	13802538	15160	13794958	12.5208333333333	18.7430555555556	12.5208333333333	21.1875	12.5208333333333	18.4791666666667	0.590953785644051	0.668025194516488
2	13802714	13869628	66914	13836171	6.875	14.1805555555556	6.875	13.5833333333333	6.875	12.625	0.506134969325153	0.484818805093046
2	13869640	13879836	10196	13874738	3.25	9.35416666666667	3.25	10.625	3.25	8.5	0.305882352941176	0.347438752783965
2	13879861	13900292	20431	13890076.5	3.79166666666667	11.3958333333333	3.79166666666667	10.2083333333333	3.79166666666667	11.0208333333333	0.371428571428571	0.3327239488117
2	14008434	14118274	109840	14063354	1.875	16.4722222222222	1.875	14.6805555555556	1.875	16.2708333333333	0.127719962157048	0.113827993254638
2	14118391	14126549	8158	14122470	14.4583333333333	20.6805555555556	14.4583333333333	21.1111111111111	14.4583333333333	19.2083333333333	0.684868421052631	0.699126930826058
2	14126570	14348033	221463	14237301.5	3.33333333333334	21.375	3.33333333333334	13.875	3.33333333333334	21.375	0.24024024024024	0.155945419103314
2	14458604	14543975	85371	14501289.5	2.125	11.5694444444444	2.125	12.6319444444444	2.125	8	0.16822429906542	0.183673469387755
2	14544105	14558431	14326	14551268	2.33333333333333	11.1875	2.33333333333333	11.3055555555556	2.33333333333333	9.20833333333334	0.206388206388206	0.208566108007449
2	14630450	14696723	66273	14663586.5	2.85416666666667	10.0694444444444	2.85416666666667	13.1319444444444	2.85416666666667	9.125	0.217345319936542	0.283448275862069
2	14696764	14845893	149129	14771328.5	4.58333333333333	14.9444444444444	4.58333333333333	12.1805555555556	4.58333333333333	13.4166666666667	0.376282782212087	0.306691449814126
2	15005164	15114919	109755	15060041.5	7.93749999999999	23.6597222222222	7.93749999999999	13.1041666666667	7.93749999999999	23.1875	0.605723370429253	0.335485764602289
2	15115029	15142746	27717	15128887.5	3.16666666666666	20.8472222222222	3.16666666666666	14.8888888888889	3.16666666666666	20.6875	0.212686567164179	0.151898734177215
2	15591347	15716075	124728	15653711	5.08333333333333	23.3333333333333	5.08333333333333	19.4583333333333	5.08333333333333	21.6041666666667	0.261241970021413	0.217857142857143
2	15883895	15909218	25323	15896556.5	3.91666666666667	13.3541666666667	3.91666666666667	14.0972222222222	3.91666666666667	9.625	0.277832512315271	0.293291731669267
2	15989912	16033265	43353	16011588.5	3.25	17.3333333333333	3.25	16.6111111111111	3.25	16.4166666666667	0.195652173913044	0.1875
2	16033575	16137340	103765	16085457.5	0.333333333333336	10.3333333333333	0.333333333333336	10.25	0.333333333333336	8.58333333333334	0.0325203252032523	0.0322580645161293
2	16141394	16316350	174956	16228872	3.79166666666667	10.7083333333333	3.79166666666667	10.8333333333333	3.79166666666667	8.47916666666667	0.35	0.354085603112841
2	16316617	16360250	43633	16338433.5	0.354166666666666	7.58333333333333	0.354166666666666	8.97222222222222	0.354166666666666	6.58333333333333	0.0394736842105263	0.0467032967032967
2	16377532	16476558	99026	16427045	1.45833333333333	14.4444444444444	1.45833333333333	11.7083333333333	1.45833333333333	14.375	0.124555160142349	0.100961538461538
2	16476595	16551638	75043	16514116.5	2.4375	14.6319444444444	2.4375	14.4166666666667	2.4375	13.6666666666667	0.169075144508671	0.166587565258662
2	16551830	16655651	103821	16603740.5	0.312500000000002	17	0.312500000000002	13.6597222222222	0.312500000000002	16.4583333333333	0.0228774783934928	0.0183823529411766
2	16656110	16693227	37117	16674668.5	1.125	14.7777777777778	1.125	14.0972222222222	1.125	13.3333333333333	0.0798029556650247	0.0761278195488722
2	16694379	16851900	157521	16773139.5	3.79166666666667	16.9166666666667	3.79166666666667	13.5833333333333	3.79166666666667	16.125	0.279141104294479	0.224137931034483
2	16851927	17245918	393991	17048922.5	0.458333333333332	8.09722222222222	0.458333333333332	12.0694444444444	0.458333333333332	7.625	0.0379746835443037	0.0566037735849055
2	17245929	17254392	8463	17250160.5	0.541666666666667	3.1875	0.541666666666667	8.63194444444444	0.541666666666667	0.166666666666668	0.0627514078841513	0.169934640522876
2	17265601	17278456	12855	17272028.5	0.791666666666666	6.45138888888889	0.791666666666666	10.0972222222222	0.791666666666666	3.1875	0.0784044016506189	0.122712594187298
2	17278588	17397658	119070	17338123	7.10416666666667	19.5069444444444	7.10416666666667	16.3680555555556	7.10416666666667	17.3958333333333	0.434026304624523	0.364186543253827
2	17397674	17440042	42368	17418858	2.66666666666667	10.3958333333333	2.66666666666667	13.0833333333333	2.66666666666667	7.83333333333333	0.203821656050955	0.256513026052104
2	17440077	17571766	131689	17505921.5	1.04166666666666	10.9791666666667	1.04166666666666	13.0416666666667	1.04166666666666	8.875	0.0798722044728433	0.0948766603415558
2	17824707	17840208	15501	17832457.5	3.3125	17.4583333333333	3.3125	17.9097222222222	3.3125	16.5208333333333	0.184955409073285	0.189737470167065
2	17843757	17963822	120065	17903789.5	14.9583333333333	25.2638888888889	14.9583333333333	19.4722222222222	14.9583333333333	20.7083333333333	0.768188302425107	0.592083562396921
2	17963878	18206821	242943	18085349.5	6.08333333333334	18.0694444444444	6.08333333333334	16.1388888888889	6.08333333333334	16.625	0.376936316695353	0.336664104534973
2	18492190	18527694	35504	18509942	1.91666666666667	27.3194444444445	1.91666666666667	18.1458333333333	1.91666666666667	26.375	0.105625717566016	0.0701576004067107
2	18527763	18739527	211764	18633645	5.33333333333334	22.3055555555556	5.33333333333334	16.4166666666667	5.33333333333334	21.5	0.324873096446701	0.239103362391034
2	18739574	18747007	7433	18743290.5	3.75000000000001	42	3.75000000000001	11.6388888888889	3.75000000000001	42	0.322195704057279	0.0892857142857144
2	18747024	18775077	28053	18761050.5	2.70833333333334	22.2916666666667	2.70833333333334	12.4166666666667	2.70833333333334	21.2916666666667	0.218120805369128	0.121495327102804
2	18775142	18835535	60393	18805338.5	2.79166666666667	13.0347222222222	2.79166666666667	8.66666666666667	2.79166666666667	8.83333333333334	0.322115384615385	0.214171550346297
2	18837030	18871311	34281	18854170.5	6.22916666666666	15.7430555555556	6.22916666666666	14.5625	6.22916666666666	14.5625	0.427753934191702	0.395677106307896
2	18871409	18945871	74462	18908640	2.16666666666667	17.2430555555556	2.16666666666667	13.2638888888889	2.16666666666667	16.8541666666667	0.163350785340314	0.12565445026178
2	18946056	19136469	190413	19041262.5	2.83333333333334	12.7986111111111	2.83333333333334	12.6111111111111	2.83333333333334	12.2708333333333	0.224669603524229	0.221378187737385
2	19248595	19320199	71604	19284397	9.97916666666667	17.2638888888889	9.97916666666667	15.4930555555556	9.97916666666667	15.375	0.644105782160466	0.578037007240547
2	19376491	19437804	61313	19407147.5	0.125000000000001	12.7291666666667	0.125000000000001	15.9305555555556	0.125000000000001	11.8958333333333	0.00784655623365309	0.00981996726677588
2	19601268	19620774	19506	19611021	1.66666666666667	7.48611111111112	1.66666666666667	11.4097222222222	1.66666666666667	6.58333333333334	0.14607425441266	0.222634508348795
2	19620914	19664458	43544	19642686	7.16666666666668	9.41666666666668	7.16666666666668	9.3888888888889	7.16666666666668	9.41666666666668	0.763313609467456	0.761061946902655
2	20074653	20344941	270288	20209797	2.27083333333334	13.1180555555556	2.27083333333334	8.77083333333333	2.27083333333334	11.0625	0.258907363420428	0.173107464266808
2	20345308	20459172	113864	20402240	2.02083333333334	12.2361111111111	2.02083333333334	8.79861111111111	2.02083333333334	10.875	0.229676400947119	0.165153234960273
2	20459184	20721294	262110	20590239	3	11.2708333333333	3	11.0347222222222	3	9.89583333333333	0.271869100062933	0.266173752310536
2	20721334	20729639	8305	20725486.5	1.02083333333333	8.59027777777778	1.02083333333333	11.2222222222222	1.02083333333333	7.14583333333333	0.0909653465346533	0.118835893290218
2	20828596	21033167	204571	20930881.5	3.20833333333333	15.2152777777778	3.20833333333333	13.7361111111111	3.20833333333333	13.9375	0.233569261880688	0.210862619808307
2	21033305	21154209	120904	21093757	4.29166666666667	14.1111111111111	4.29166666666667	13.2222222222222	4.29166666666667	13.2291666666667	0.324579831932773	0.304133858267717
2	21405317	21633418	228101	21519367.5	0.75	11.9583333333333	0.75	10.7777777777778	0.75	11.0416666666667	0.0695876288659794	0.0627177700348432
2	21633945	21882845	248900	21758395	1.85416666666666	9.38194444444445	1.85416666666666	13.6388888888889	1.85416666666666	7.375	0.135947046843177	0.197631384159881
2	21884886	21907331	22445	21896108.5	0.0416666666666681	11.0833333333333	0.0416666666666681	12.7083333333333	0.0416666666666681	8.9375	0.00327868852459027	0.00375939849624073
2	21907605	22022625	115020	21965115	0.208333333333334	6.64583333333333	0.208333333333334	10.8263888888889	0.208333333333334	6.25	0.0192431045542014	0.0313479623824452
2	22022675	22104481	81806	22063578	3.41666666666667	12.7013888888889	3.41666666666667	13.75	3.41666666666667	11.1458333333333	0.248484848484849	0.268999453253144
2	22104885	22110744	5859	22107814.5	1.54166666666667	11.3888888888889	1.54166666666667	15.4027777777778	1.54166666666667	5.41666666666667	0.100090171325518	0.135365853658537
2	22160869	22261443	100574	22211156	5	18.0555555555556	5	13.4444444444444	5	17	0.371900826446281	0.276923076923077
2	22348333	22423863	75530	22386098	0.520833333333331	7.43055555555556	0.520833333333331	9.71527777777778	0.520833333333331	6.5	0.0536097212294494	0.070093457943925
2	22491815	22529205	37390	22510510	7.5	20.0972222222222	7.5	15.8333333333333	7.5	17.4791666666667	0.473684210526316	0.37318590186593
2	22815846	22851147	35301	22833496.5	0.750000000000001	8.125	0.750000000000001	10.2638888888889	0.750000000000001	7.14583333333333	0.0730717185385657	0.0923076923076924
2	22851167	22852188	1021	22851677.5	0.375	5.47222222222223	0.375	9.54166666666667	0.375	1.97916666666667	0.0393013100436681	0.0685279187817259
2	22963487	23121773	158286	23042630	4.45833333333334	15.1319444444444	4.45833333333334	15.4305555555556	4.45833333333334	14.1875	0.288928892889289	0.294630564479119
2	23121780	23195475	73695	23158627.5	1.5	8.00694444444444	1.5	13.8472222222222	1.5	7.08333333333333	0.108324974924774	0.18733738074588
2	23195737	23249717	53980	23222727	0.541666666666668	8.47916666666666	0.541666666666668	15.8333333333333	0.541666666666668	7.125	0.0342105263157895	0.063882063882064
2	23249726	23261891	12165	23255808.5	5.04166666666667	11.1666666666667	5.04166666666667	14.1111111111111	5.04166666666667	10.1458333333333	0.357283464566929	0.451492537313433
2	23505274	23577421	72147	23541347.5	4.66666666666667	11.2222222222222	4.66666666666667	9.26388888888889	4.66666666666667	10.2708333333333	0.503748125937031	0.415841584158416
2	23616396	23622058	5662	23619227	13.125	24.6597222222222	13.125	16.7916666666667	13.125	21.1875	0.781637717121588	0.532244438186426
2	23622075	23757114	135039	23689594.5	3.02083333333333	13.4166666666667	3.02083333333333	8.72916666666667	3.02083333333333	13.4166666666667	0.346062052505967	0.225155279503106
2	23757115	23937564	180449	23847339.5	2.16666666666667	22.7777777777778	2.16666666666667	13.4444444444444	2.16666666666667	22.6666666666667	0.161157024793388	0.0951219512195121
2	23937593	24096884	159291	24017238.5	1.25	11.5069444444444	1.25	9.31944444444444	1.25	11.1041666666667	0.134128166915052	0.108630054315027
2	24171532	24333346	161814	24252439	2.02083333333334	14.3333333333333	2.02083333333334	9.72222222222222	2.02083333333334	12.4166666666667	0.207857142857143	0.140988372093023
2	24333360	24460250	126890	24396805	1.02083333333333	12.4652777777778	1.02083333333333	13.5486111111111	1.02083333333333	11.3333333333333	0.0753459764223475	0.0818941504178272
2	24461965	24560853	98888	24511409	1.5	12.4652777777778	1.5	15.5763888888889	1.5	10.6666666666667	0.0962995987516717	0.12033426183844
2	24982876	25020872	37996	25001874	4.5625	14.6111111111111	4.5625	15.2291666666667	4.5625	13.1458333333333	0.299589603283174	0.312262357414449
2	25020876	25246406	225530	25133641	2.33333333333333	10.6041666666667	2.33333333333333	9.26388888888889	2.33333333333333	10.0833333333333	0.251874062968516	0.220039292730845
2	25286044	25434696	148652	25360370	2.83333333333333	12.2777777777778	2.83333333333333	11.0694444444444	2.83333333333333	11.1666666666667	0.255959849435383	0.230769230769231
2	25434697	25460331	25634	25447514	1.70833333333333	12.9444444444444	1.70833333333333	12.3611111111111	1.70833333333333	11.5625	0.138202247191011	0.131974248927039
2	25460342	25579816	119474	25520079	0.208333333333331	5.64583333333333	0.208333333333331	5.04166666666667	0.208333333333331	5.3125	0.0413223140495863	0.0369003690036897
2	25579825	25711943	132118	25645884	0.229166666666666	5.29166666666667	0.229166666666666	7.89583333333334	0.229166666666666	1.5625	0.0290237467018468	0.0433070866141729
2	25712191	26393856	681665	26053023.5	3.20833333333333	9.04861111111111	3.20833333333333	8.26388888888889	3.20833333333333	7.4375	0.388235294117647	0.354566385264774
2	27010726	27065600	54874	27038163	6.91666666666666	28.6041666666667	6.91666666666666	12.8194444444444	6.91666666666666	27.9375	0.539544962080173	0.241806263656227
2	27065732	27115922	50190	27090827	9.77083333333333	29.6180555555556	9.77083333333333	11.4097222222222	9.77083333333333	28.5208333333333	0.856360316494218	0.32989449003517
2	27115932	27123911	7979	27119921.5	6.08333333333334	17.3819444444444	6.08333333333334	10.8333333333333	6.08333333333334	17.2916666666667	0.561538461538462	0.349980023971235
2	27124085	27286897	162812	27205491	0.166666666666667	8.35416666666667	0.166666666666667	9.61805555555555	0.166666666666667	5.6875	0.0173285198555957	0.0199501246882793
2	27504481	27551293	46812	27527887	4.625	19.6458333333333	4.625	13.25	4.625	19.1041666666667	0.349056603773585	0.235418875927889
2	27678463	28184561	506098	27931512	4.375	20.9652777777778	4.375	11.6388888888889	4.375	20.9375	0.375894988066826	0.208678370321299
2	28188686	28212866	24180	28200776	2.58333333333333	11.8333333333333	2.58333333333333	11.7638888888889	2.58333333333333	10.75	0.219598583234947	0.21830985915493
2	28212881	28214475	1594	28213678	2.5	4.9375	2.5	10.3888888888889	2.5	3.41666666666667	0.240641711229947	0.506329113924051
2	28215902	28217179	1277	28216540.5	1.52083333333334	4.13888888888889	1.52083333333334	8.86458333333334	1.52083333333334	3.35416666666667	0.171562867215041	0.367449664429531
2	28472687	28489620	16933	28481153.5	1.04166666666667	15.2152777777778	1.04166666666667	15.6666666666667	1.04166666666667	14.9375	0.0664893617021276	0.0684618895481514
2	29029096	29252971	223875	29141033.5	6.70833333333333	14.3611111111111	6.70833333333333	13.2361111111111	6.70833333333333	12.2291666666667	0.506820566631689	0.467117988394584
2	29252977	29271009	18032	29261993	4.75	9.875	4.75	11.2638888888889	4.75	9.6875	0.42170160295931	0.481012658227849
2	29271054	29291375	20321	29281214.5	3.58333333333334	14.0555555555556	3.58333333333334	13.3888888888889	3.58333333333334	13.5	0.267634854771784	0.254940711462451
2	29347898	29489663	141765	29418780.5	2.64583333333333	19.7638888888889	2.64583333333333	14.6736111111111	2.64583333333333	18.8125	0.18031235210601	0.133872101194659
2	29489709	29501182	11473	29495445.5	5.625	23.8333333333333	5.625	14.7638888888889	5.625	23.75	0.380997177798683	0.236013986013986
2	29501207	29560425	59218	29530816	2.54166666666667	11.5833333333333	2.54166666666667	16.0416666666667	2.54166666666667	11.1666666666667	0.158441558441558	0.219424460431655
2	29560522	29703852	143330	29632187	1.29166666666667	13.4722222222222	1.29166666666667	13.2638888888889	1.29166666666667	12.0416666666667	0.0973821989528797	0.0958762886597939
2	29703857	29829805	125948	29766831	1.16666666666667	19.1666666666667	1.16666666666667	13.2083333333333	1.16666666666667	18.7916666666667	0.0883280757097792	0.0608695652173913
2	30149355	30164813	15458	30157084	7.04166666666667	18.5902777777778	7.04166666666667	15.7916666666667	7.04166666666667	18.2708333333333	0.445910290237467	0.378782218901756
2	30164921	30310703	145782	30237812	4.25	15.3472222222222	4.25	14.0138888888889	4.25	13.6458333333333	0.303270564915758	0.276923076923077
2	30901847	30903421	1574	30902634	0.229166666666668	3.90277777777778	0.229166666666668	7.68055555555556	0.229166666666668	2.1875	0.0298372513562388	0.0587188612099647
2	30903573	30934932	31359	30919252.5	0.0208333333333335	1.81944444444444	0.0208333333333335	12.1597222222222	0.0208333333333335	1.29166666666667	0.00171330668189608	0.0114503816793894
2	30942824	30956968	14144	30949896	0.812500000000001	5.76388888888889	0.812500000000001	9.875	0.812500000000001	3.22916666666667	0.0822784810126584	0.140963855421687
2	30956976	30992385	35409	30974680.5	3.83333333333333	17.5833333333333	3.83333333333333	13.4166666666667	3.83333333333333	15.7291666666667	0.285714285714286	0.218009478672986
2	30992410	31216787	224377	31104598.5	1.125	16.0347222222222	1.125	9.18055555555556	1.125	14.9166666666667	0.122541603630862	0.0701602425292334
2	31216980	31219317	2337	31218148.5	3.45833333333333	7.48611111111111	3.45833333333333	8.97222222222222	3.45833333333333	5.9375	0.385448916408669	0.461966604823748
2	31219348	31444367	225019	31331857.5	2.70833333333333	11.6319444444444	2.70833333333333	5.18055555555556	2.70833333333333	11.4375	0.522788203753351	0.232835820895522
2	31444370	31531905	87535	31488137.5	2.47916666666667	17.3541666666667	2.47916666666667	11.6041666666667	2.47916666666667	16.0416666666667	0.213644524236984	0.142857142857143
2	31532007	31672530	140523	31602268.5	8.14583333333334	15.5833333333333	8.14583333333334	14.2638888888889	8.14583333333334	15.0416666666667	0.571080817916261	0.522727272727273
2	31672850	31779030	106180	31725940	2.64583333333333	15.4791666666667	2.64583333333333	9.42361111111112	2.64583333333333	15.0625	0.280766396462785	0.17092866756393
2	31779225	31831642	52417	31805433.5	0.958333333333337	11.3194444444444	0.958333333333337	12.8194444444444	0.958333333333337	9.95833333333334	0.0747562296858075	0.0846625766871169
2	31922098	31926123	4025	31924110.5	2.41666666666667	4.76388888888889	2.41666666666667	10.5833333333333	2.41666666666667	3.89583333333333	0.228346456692913	0.507288629737609
2	32086861	32200512	113651	32143686.5	0.541666666666666	10.7986111111111	0.541666666666666	13	0.541666666666666	9.08333333333333	0.0416666666666666	0.05016077170418
2	32456481	32590715	134234	32523598	0.291666666666664	9.09027777777778	0.291666666666664	12.125	0.291666666666664	7.8125	0.0240549828178692	0.0320855614973259
2	32591303	32880950	289647	32736126.5	4.6875	11.7291666666667	4.6875	13.0590277777778	4.6875	10.125	0.358947088540282	0.399644760213144
2	32881286	32895585	14299	32888435.5	7.20833333333333	13.2222222222222	7.20833333333333	13.7361111111111	7.20833333333333	10.9791666666667	0.524772497472194	0.545168067226891
2	32895726	32907987	12261	32901856.5	11	19.8055555555556	11	15.9722222222222	11	16.4375	0.688695652173913	0.555399719495091
2	32907993	33136936	228943	33022464.5	12.5833333333333	21.1805555555556	12.5833333333333	17.0277777777778	12.5833333333333	16.0833333333333	0.738988580750408	0.594098360655738
2	33136945	33367099	230154	33252022	3.75	17.125	3.75	13.5416666666667	3.75	16.6041666666667	0.276923076923077	0.218978102189781
2	33367130	33573560	206430	33470345	2.79166666666667	17.625	2.79166666666667	13.2638888888889	2.79166666666667	17.4583333333333	0.210471204188482	0.15839243498818
2	33573687	33705591	131904	33639639	3.125	11.9166666666667	3.125	9.15277777777778	3.125	10.2083333333333	0.341426403641882	0.262237762237762
2	33806038	33823193	17155	33814615.5	3.70833333333333	15.0694444444444	3.70833333333333	9.84722222222222	3.70833333333333	14.8958333333333	0.376586741889986	0.246082949308756
2	33823200	33970624	147424	33896912	1.35416666666667	4.64583333333333	1.35416666666667	8.28819444444444	1.35416666666667	4.47916666666667	0.16338500209468	0.291479820627803
2	33970648	34092092	121444	34031370	3.16666666666666	12.3958333333333	3.16666666666666	11.2222222222222	3.16666666666666	11.8541666666667	0.282178217821782	0.255462184873949
2	34092257	34339080	246823	34215668.5	3.58333333333333	21.2986111111111	3.58333333333333	12.9027777777778	3.58333333333333	20	0.277717976318622	0.168242582328008
2	34339096	34405115	66019	34372105.5	0.916666666666666	17.0833333333333	0.916666666666666	16.4722222222222	0.916666666666666	17.0833333333333	0.0556492411467116	0.0536585365853658
2	34405396	34427525	22129	34416460.5	19.9583333333333	24.4027777777778	19.9583333333333	26.2291666666667	19.9583333333333	24.375	0.760921366163622	0.817871371656232
2	34427625	34433265	5640	34430445	12.8333333333333	15.6875	12.8333333333333	18.9583333333333	12.8333333333333	14.8333333333333	0.676923076923077	0.818061088977424
2	34461348	34473204	11856	34467276	8.08333333333333	13.8055555555556	8.08333333333333	14.0833333333333	8.08333333333333	11.1458333333333	0.57396449704142	0.585513078470825
2	34648793	34864714	215921	34756753.5	0.249999999999997	14.625	0.249999999999997	9	0.249999999999997	14.2916666666667	0.0277777777777775	0.0170940170940169
2	34864758	34867085	2327	34865921.5	2.29166666666667	7.52083333333333	2.29166666666667	4.45833333333333	2.29166666666667	6.66666666666667	0.514018691588785	0.304709141274238
2	34867086	34868131	1045	34867608.5	2.33333333333333	11.25	2.33333333333333	6.55555555555555	2.33333333333333	10.5	0.355932203389831	0.207407407407407
2	34868158	34972856	104698	34920507	0.833333333333332	6.375	0.833333333333332	6.93055555555555	0.833333333333332	5.04166666666667	0.120240480961924	0.130718954248366
2	34972896	35041146	68250	35007021	1.52083333333333	8.75694444444444	1.52083333333333	11.3055555555556	1.52083333333333	7.72916666666666	0.134520884520884	0.173671689135607
2	35041156	35164748	123592	35102952	2.0625	15.1111111111111	2.0625	11.5625	2.0625	14.3541666666667	0.178378378378378	0.136488970588235
2	35327698	35894476	566778	35611087	2.04166666666667	9.03472222222222	2.04166666666667	10.1805555555556	2.04166666666667	7.54166666666667	0.200545702592088	0.22598001537279
2	35894484	35960140	65656	35927312	6.89583333333333	19.6388888888889	6.89583333333333	12.4027777777778	6.89583333333333	18.9583333333333	0.555991041433371	0.351131541725601
2	35960215	36271959	311744	36116087	2.45833333333333	8.36111111111111	2.45833333333333	12.0416666666667	2.45833333333333	7.27083333333333	0.204152249134948	0.294019933554817
2	36947981	36949884	1903	36948932.5	2.0625	5.75000000000001	2.0625	6.32986111111111	2.0625	3.02083333333333	0.325836533187054	0.358695652173913
2	36949939	37075056	125117	37012497.5	1.33333333333334	17.2708333333333	1.33333333333334	17.6319444444444	1.33333333333334	16.7083333333333	0.0756203229617961	0.0772014475271413
2	37087256	37193290	106034	37140273	14.3333333333333	28.4305555555556	14.3333333333333	22.4722222222222	14.3333333333333	27.5833333333333	0.637824474660074	0.504152418172936
2	37193548	37229566	36018	37211557	0.0833333333333318	11.0277777777778	0.0833333333333318	14.8194444444444	0.0833333333333318	9.52083333333333	0.00562324273664469	0.00755667506297215
2	37229624	37393505	163881	37311564.5	0.708333333333333	11.8611111111111	0.708333333333333	12.3472222222222	0.708333333333333	11.75	0.0573678290213723	0.059718969555035
2	37393511	37402486	8975	37397998.5	2.3125	8.90972222222223	2.3125	11.2291666666667	2.3125	8.39583333333334	0.205936920222635	0.259547934528449
2	37402502	37465567	63065	37434034.5	5	10.9375	5	9.875	5	9.4375	0.506329113924051	0.457142857142857
2	37465675	37472186	6511	37468930.5	0.999999999999999	7.04166666666667	0.999999999999999	11.2222222222222	0.999999999999999	6.02083333333334	0.0891089108910891	0.142011834319526
2	37537095	37749707	212612	37643401	0.0416666666666652	12.4027777777778	0.0416666666666652	11.9444444444444	0.0416666666666652	11.6875	0.00348837209302313	0.00335946248600212
2	38092515	38145684	53169	38119099.5	1.25	9.06944444444445	1.25	11.9722222222222	1.25	4.58333333333333	0.104408352668214	0.137825421133231
2	38145778	38183480	37702	38164629	10.0833333333333	14.0208333333333	10.0833333333333	15.1805555555556	10.0833333333333	12.9375	0.664226898444648	0.719167904903417
2	38183540	38293241	109701	38238390.5	4.79166666666667	23.5625	4.79166666666667	17.875	4.79166666666667	20.5625	0.268065268065268	0.203359858532273
2	38296464	38491441	194977	38393952.5	1.04166666666667	12.4236111111111	1.04166666666667	12.125	1.04166666666667	11.3125	0.0859106529209622	0.0838457238680827
2	38730513	38952584	222071	38841548.5	4.625	15.7152777777778	4.625	11.8333333333333	4.625	15.1875	0.390845070422535	0.294299602297835
2	38955647	39178949	223302	39067298	0.916666666666669	14.8333333333333	0.916666666666669	14.3611111111111	0.916666666666669	14.0833333333333	0.0638297872340428	0.0617977528089889
2	39179041	39225907	46866	39202474	0.187499999999999	6.56944444444444	0.187499999999999	10.2430555555556	0.187499999999999	5	0.0183050847457626	0.0285412262156446
2	39225949	39331401	105452	39278675	6.75	13.2777777777778	6.75	15.7916666666667	6.75	12.4375	0.427440633245383	0.50836820083682
2	39331478	39502644	171166	39417061	1	5.20138888888889	1	10.5833333333333	1	3.8125	0.0944881889763779	0.192256341789052
2	39502673	39871649	368976	39687161	0.500000000000002	11.5069444444444	0.500000000000002	13.7222222222222	0.500000000000002	10.4791666666667	0.0364372469635629	0.043452021726011
2	39927767	40050975	123208	39989371	3.25	17.0902777777778	3.25	13.1111111111111	3.25	17.0416666666667	0.247881355932204	0.190166598943519
2	40051886	40066253	14367	40059069.5	2.75	17.5	2.75	10.3055555555556	2.75	16.8333333333333	0.266846361185984	0.157142857142857
2	40066271	40166477	100206	40116374	2.20833333333334	10.0208333333333	2.20833333333334	11.3888888888889	2.20833333333334	8.75	0.193902439024391	0.220374220374221
2	40166485	40168367	1882	40167426	5.70833333333333	10.4444444444444	5.70833333333333	15.3194444444444	5.70833333333333	5.66666666666667	0.372620126926564	0.54654255319149
2	40168409	40178318	9909	40173363.5	0.666666666666667	15.3402777777778	0.666666666666667	14.8333333333333	0.666666666666667	13.8333333333333	0.0449438202247191	0.0434585785423269
2	40178416	40422611	244195	40300513.5	0.916666666666668	14.4375	0.916666666666668	10.3888888888889	0.916666666666668	13.1666666666667	0.0882352941176471	0.0634920634920636
2	40422670	40635332	212662	40529001	1.60416666666667	12.6041666666667	1.60416666666667	9.95138888888889	1.60416666666667	9.875	0.161200279134682	0.127272727272727
2	40635342	40693018	57676	40664180	0.166666666666666	13.9861111111111	0.166666666666666	8.94444444444445	0.166666666666666	12.875	0.0186335403726707	0.0119165839126117
2	40868422	41039974	171552	40954198	21.3958333333333	30.1458333333333	21.3958333333333	27.0347222222222	21.3958333333333	29.0625	0.791420498330336	0.709744298548722
2	41040685	41118770	78085	41079727.5	1.75	20.6180555555556	1.75	11.6111111111111	1.75	19.9166666666667	0.150717703349282	0.0848770629841698
2	41133862	41308581	174719	41221221.5	1.04166666666667	9.27083333333334	1.04166666666667	11.4166666666667	1.04166666666667	6.22916666666667	0.0912408759124089	0.112359550561798
2	41308917	41566016	257099	41437466.5	0.520833333333332	8.0625	0.520833333333332	9.8125	0.520833333333332	7.02083333333333	0.0530785562632695	0.0645994832041342
2	41933043	42114075	181032	42023559	3.64583333333333	12.5555555555556	3.64583333333333	15.2986111111111	3.64583333333333	11.8125	0.238311393554244	0.29037610619469
2	42114698	42133000	18302	42123849	5.85416666666667	16.7638888888889	5.85416666666667	17.0763888888889	5.85416666666667	15.8541666666667	0.342822285481903	0.349212924606462
2	42133087	42360135	227048	42246611	4.22916666666667	13.2222222222222	4.22916666666667	15.0555555555556	4.22916666666667	12.4791666666667	0.280904059040591	0.319852941176471
2	42528484	42674343	145859	42601413.5	3.04166666666666	13.8888888888889	3.04166666666666	9.31944444444444	3.04166666666666	13.6666666666667	0.326378539493293	0.219
2	42674351	42915288	240937	42794819.5	1.5	9.96527777777778	1.5	10.3541666666667	1.5	8.35416666666667	0.144869215291751	0.150522648083624
2	42987081	43246655	259574	43116868	8.22916666666666	19.6458333333333	8.22916666666666	15.3541666666667	8.22916666666666	15.2083333333333	0.5359565807327	0.418875927889714
2	43247176	43803167	555991	43525171.5	1.72916666666667	15.2638888888889	1.72916666666667	13.6041666666667	1.72916666666667	12.9166666666667	0.127105666156202	0.113284804367607
2	43969466	44060976	91510	44015221	5.22916666666667	21.3402777777778	5.22916666666667	8.31944444444445	5.22916666666667	20.875	0.628547579298831	0.24503742271396
2	44661581	44827208	165627	44744394.5	4.16666666666667	16.8819444444444	4.16666666666667	13.5277777777778	4.16666666666667	16.7708333333333	0.308008213552361	0.246812011517894
2	44827209	45018839	191630	44923024	4.5625	15.4583333333333	4.5625	11.7569444444444	4.5625	14.6875	0.38806851742469	0.295148247978437
2	45342604	45570551	227947	45456577.5	7.125	18.3125	7.125	18.6666666666667	7.125	17.25	0.381696428571429	0.389078498293515
2	45570798	45747179	176381	45658988.5	1.6875	6.63194444444444	1.6875	11.3402777777778	1.6875	5.125	0.148805878750765	0.254450261780105
2	45747188	45759199	12011	45753193.5	3.45833333333333	6	3.45833333333333	10.1041666666667	3.45833333333333	5.0625	0.342268041237113	0.576388888888889
2	45759210	45760045	835	45759627.5	2.8125	4.46527777777778	2.8125	8.23611111111111	2.8125	3.22916666666667	0.341483979763913	0.6298600311042
2	45760074	45848022	87948	45804048	0.875	6.02777777777778	0.875	8.88541666666667	0.875	4.5	0.0984759671746776	0.145161290322581
2	45848088	46064501	216413	45956294.5	2.29166666666667	10.6805555555556	2.29166666666667	10.9097222222222	2.29166666666667	10.125	0.210057288351368	0.214564369310793
2	46064511	46149612	85101	46107061.5	1.91666666666667	6.91666666666667	1.91666666666667	10.6180555555556	1.91666666666667	6.14583333333333	0.18051013734467	0.27710843373494
2	46406373	46619652	213279	46513012.5	1.85416666666667	6.27777777777778	1.85416666666667	7.47222222222222	1.85416666666667	4.875	0.248141263940521	0.295353982300885
2	46619658	46656818	37160	46638238	0.875000000000003	3.25694444444444	0.875000000000003	9.70833333333333	0.875000000000003	0.354166666666666	0.0901287553648072	0.268656716417912
2	46976928	47067441	90513	47022184.5	1.20833333333333	6.88888888888889	1.20833333333333	7.05555555555556	1.20833333333333	4.75	0.171259842519685	0.175403225806452
2	47067657	47156409	88752	47112033	0.583333333333333	6.19444444444445	0.583333333333333	8.58333333333333	0.583333333333333	4.79166666666667	0.0679611650485437	0.0941704035874439
2	47156420	47166396	9976	47161408	3.5	10.3402777777778	3.5	6.63888888888889	3.5	9.72916666666667	0.527196652719666	0.338482202820685
2	47166569	47310482	143913	47238525.5	0.291666666666664	4.71527777777778	0.291666666666664	8.29166666666667	0.291666666666664	4.39583333333333	0.0351758793969846	0.0618556701030922
2	47310637	47484096	173459	47397366.5	0.958333333333333	7.64583333333333	0.958333333333333	8.36111111111112	0.958333333333333	7.10416666666667	0.114617940199335	0.125340599455041
2	48137129	48178088	40959	48157608.5	0.1875	12.5625	0.1875	9.27083333333333	0.1875	10.75	0.0202247191011235	0.0149253731343283
2	48178089	48185105	7016	48181597	1.29166666666667	6.13194444444445	1.29166666666667	9.20833333333334	1.29166666666667	4.77083333333333	0.14027149321267	0.210645526613817
2	48185169	48209436	24267	48197302.5	2.70833333333334	8.15972222222222	2.70833333333334	10.125	2.70833333333334	6.27083333333333	0.267489711934157	0.331914893617022
2	48209551	48279244	69693	48244397.5	1.95833333333333	8.93055555555556	1.95833333333333	12.3263888888889	1.95833333333333	6.89583333333334	0.15887323943662	0.219284603421462
2	48279261	48432806	153545	48356033.5	4.22916666666667	10.9861111111111	4.22916666666667	10.7569444444444	4.22916666666667	10.2708333333333	0.393156875403486	0.384955752212389
2	48432810	48454396	21586	48443603	4.5	8.71527777777778	4.5	10.0833333333333	4.5	8.375	0.446280991735537	0.516334661354581
2	48454565	48483298	28733	48468931.5	6.4375	14.9097222222222	6.4375	12.0486111111111	6.4375	14.1458333333333	0.534293948126801	0.431765253842571
2	48483483	48496361	12878	48489922	4.25	7.27083333333333	4.25	10.9166666666667	4.25	6.85416666666667	0.389312977099237	0.584527220630373
2	48496714	48645825	149111	48571269.5	18.1666666666667	31.9444444444444	18.1666666666667	20.9305555555556	18.1666666666667	31.5	0.867949568679496	0.568695652173913
2	48648014	48726370	78356	48687192	13.5416666666667	24.1805555555556	13.5416666666667	19.9305555555556	13.5416666666667	20.4166666666667	0.679442508710801	0.560022975301551
2	48726387	48733126	6739	48729756.5	2.79166666666667	13.5833333333333	2.79166666666667	14.3194444444444	2.79166666666667	13.2708333333333	0.194956353055286	0.205521472392638
2	48733214	48745677	12463	48739445.5	20.1041666666667	37.6597222222222	20.1041666666667	22.2083333333333	20.1041666666667	36.2916666666667	0.905253283302064	0.533837359395169
2	48745716	49036898	291182	48891307	5.16666666666667	16.4722222222222	5.16666666666667	11.0416666666667	5.16666666666667	15.75	0.467924528301887	0.313659359190556
2	49220999	49293042	72043	49257020.5	3.66666666666666	20.2152777777778	3.66666666666666	14.1527777777778	3.66666666666666	19.2708333333333	0.259077526987242	0.181380968739265
2	49293063	49346843	53780	49319953	1.45833333333333	11.625	1.45833333333333	14.0416666666667	1.45833333333333	11.0625	0.103857566765579	0.125448028673835
2	50199607	50334533	134926	50267070	0.29166666666667	13.6736111111111	0.29166666666667	10.375	0.29166666666667	13.4791666666667	0.0281124497991971	0.0213306246825802
2	50334661	50350819	16158	50342740	1.72916666666667	9.97222222222222	1.72916666666667	7.61805555555556	1.72916666666667	9.75	0.226982680036463	0.173398328690808
2	50546100	50584861	38761	50565480.5	3.58333333333334	15.7430555555556	3.58333333333334	16.75	3.58333333333334	13.875	0.213930348258707	0.227613586237318
2	50585010	50651237	66227	50618123.5	3.20833333333333	15.6111111111111	3.20833333333333	11.8611111111111	3.20833333333333	14.5833333333333	0.270491803278688	0.205516014234875
2	50955216	51114499	159283	51034857.5	0.666666666666666	14.5625	0.666666666666666	14.9861111111111	0.666666666666666	12.8958333333333	0.0444856348470806	0.0457796852646638
2	51733002	51815825	82823	51774413.5	4.25	16.9930555555556	4.25	16.4166666666667	4.25	16.7291666666667	0.258883248730965	0.25010216591745
2	51815829	51853999	38170	51834914	0.437500000000004	13.8888888888889	0.437500000000004	7.70833333333334	0.437500000000004	13.1666666666667	0.0567567567567572	0.0315000000000003
2	52067569	52074160	6591	52070864.5	5.75	18.75	5.75	12.0833333333333	5.75	17.5	0.475862068965517	0.306666666666667
2	52075075	52183381	108306	52129228	2.66666666666666	13.0416666666667	2.66666666666666	14.3055555555556	2.66666666666666	11.5625	0.186407766990291	0.204472843450479
2	53055451	53064027	8576	53059739	6.58333333333333	14.7291666666667	6.58333333333333	13.4583333333333	6.58333333333333	13.4375	0.489164086687306	0.446958981612447
2	53064041	53066348	2307	53065194.5	4.54166666666667	13.2986111111111	4.54166666666667	5.16666666666667	4.54166666666667	13.0833333333333	0.879032258064516	0.341514360313316
2	53066426	53073914	7488	53070170	3.95833333333334	16.1875	3.95833333333334	7.08333333333334	3.95833333333334	15.875	0.558823529411765	0.244530244530245
2	53073921	53075700	1779	53074810.5	3.25	8.50694444444444	3.25	4.91666666666667	3.25	7.6875	0.661016949152542	0.382040816326531
2	53075703	53077306	1603	53076504.5	3.27083333333333	12.9236111111111	3.27083333333333	4.58333333333334	3.27083333333333	12.5625	0.713636363636364	0.253089736700699
2	53077420	53188294	110874	53132857	0.833333333333337	10.875	0.833333333333337	8.92361111111111	0.833333333333337	10.375	0.0933852140077825	0.0766283524904218
2	53191111	53217019	25908	53204065	4.45833333333333	24.2916666666667	4.45833333333333	13.1666666666667	4.45833333333333	23.9583333333333	0.338607594936709	0.183533447684391
2	53305071	53428862	123791	53366966.5	4.375	15.6319444444444	4.375	9.25694444444444	4.375	15.0208333333333	0.472618154538635	0.279875610839627
2	53428951	53503932	74981	53466441.5	3.58333333333333	12.3888888888889	3.58333333333333	8.41666666666667	3.58333333333333	12	0.425742574257426	0.289237668161435
2	53504942	53575248	70306	53540095	2.77083333333334	15.4513888888889	2.77083333333334	10.2222222222222	2.77083333333334	15.1458333333333	0.271059782608696	0.179325842696629
2	53579242	53734816	155574	53657029	1.125	9.45833333333333	1.125	6.15277777777778	1.125	8.20833333333333	0.182844243792324	0.118942731277533
2	53841148	54005728	164580	53923438	1.45833333333333	12.0277777777778	1.45833333333333	15.75	1.45833333333333	11.5833333333333	0.0925925925925923	0.121247113163972
2	54148803	54170688	21885	54159745.5	2.91666666666667	8.61111111111111	2.91666666666667	9.23611111111111	2.91666666666667	7.54166666666667	0.315789473684211	0.338709677419355
2	54170819	54190078	19259	54180448.5	3.3125	26.75	3.3125	14.0277777777778	3.3125	26.75	0.236138613861386	0.123831775700934
2	54190189	54240625	50436	54215407	3.41666666666667	22.0486111111111	3.41666666666667	11.8541666666667	3.41666666666667	21.9375	0.288224956063269	0.15496062992126
2	54761447	54982722	221275	54872084.5	1.41666666666667	17.6666666666667	1.41666666666667	12.0555555555556	1.41666666666667	17	0.117511520737327	0.0801886792452829
2	54982779	54999651	16872	54991215	0.124999999999999	11.0069444444444	0.124999999999999	9.05555555555556	0.124999999999999	10.9375	0.013803680981595	0.0113564668769716
2	54999676	55093774	94098	55046725	0.937500000000001	10.0763888888889	0.937500000000001	8.42361111111111	0.937500000000001	9.89583333333333	0.111294311624073	0.0930392832529291
2	55846999	55868371	21372	55857685	5.04166666666667	11.0486111111111	5.04166666666667	14.2013888888889	5.04166666666667	9.97916666666667	0.355012224938875	0.456316781898177
2	56080985	56279979	198994	56180482	0.104166666666668	9.56944444444445	0.104166666666668	13.5763888888889	0.104166666666668	6.5625	0.00767263427109981	0.0108853410740204
2	56324809	56331498	6689	56328153.5	0.5	12.4166666666667	0.5	14.2083333333333	0.5	11.8958333333333	0.0351906158357771	0.0402684563758389
2	56823041	56939399	116358	56881220	0.5625	9.22916666666667	0.5625	9.47916666666667	0.5625	9.22916666666667	0.0593406593406593	0.0609480812641083
2	56939415	57100301	160886	57019858	0.666666666666666	19.2291666666667	0.666666666666666	11.5277777777778	0.666666666666666	18.2291666666667	0.0578313253012048	0.0346695557963163
2	57100307	57181326	81019	57140816.5	1.9375	10.3541666666667	1.9375	8.75694444444445	1.9375	9.41666666666667	0.221252973830293	0.187122736418511
2	57181376	57213873	32497	57197624.5	2.20833333333333	13.0763888888889	2.20833333333333	8.30555555555556	2.20833333333333	12.7083333333333	0.265886287625418	0.168879447689857
2	57214053	57417620	203567	57315836.5	2.91666666666666	20.5069444444444	2.91666666666666	12.0277777777778	2.91666666666666	19.9791666666667	0.242494226327944	0.142228242465289
2	58311508	58344629	33121	58328068.5	0.562500000000001	12.2569444444444	0.562500000000001	9.84722222222222	0.562500000000001	11.3958333333333	0.0571227080394923	0.0458923512747876
2	58344646	58387885	43239	58366265.5	9.83333333333333	30.7708333333333	9.83333333333333	13.1666666666667	9.83333333333333	29.875	0.746835443037975	0.319566689234936
2	58387893	58394287	6394	58391090	0.125000000000002	5.22222222222222	0.125000000000002	14.625	0.125000000000002	2.60416666666667	0.00854700854700871	0.0239361702127664
2	58394577	58465297	70720	58429937	3.91666666666667	15.1736111111111	3.91666666666667	14.8472222222222	3.91666666666667	13.8958333333333	0.263797942001871	0.25812356979405
2	59202907	59220176	17269	59211541.5	0.770833333333332	6.44444444444444	0.770833333333332	8.88888888888889	0.770833333333332	5.22916666666667	0.0867187499999998	0.119612068965517
2	59367081	59386502	19421	59376791.5	8.12500000000001	26.1319444444444	8.12500000000001	13.2777777777778	8.12500000000001	25.0625	0.611924686192469	0.310922136593144
2	59386530	59431032	44502	59408781	5.25	19.4930555555556	5.25	14.4861111111111	5.25	17.1458333333333	0.36241610738255	0.26932668329177
2	59909440	59974364	64924	59941902	4.75	22.4444444444444	4.75	10.0277777777778	4.75	21.875	0.473684210526316	0.211633663366337
2	59974410	59991340	16930	59982875	2.58333333333333	14.3611111111111	2.58333333333333	5.91666666666667	2.58333333333333	13.6666666666667	0.436619718309859	0.179883945841393
2	60360029	60563898	203869	60461963.5	8.3125	19.4930555555556	8.3125	14.5138888888889	8.3125	18.3333333333333	0.572727272727273	0.42643391521197
2	60747649	60768896	21247	60758272.5	1.08333333333334	6.19444444444445	1.08333333333334	10.6111111111111	1.08333333333334	5	0.102094240837697	0.174887892376682
2	61655700	61738607	82907	61697153.5	1.45833333333333	12.1527777777778	1.45833333333333	7.72222222222223	1.45833333333333	10.4166666666667	0.188848920863309	0.12
2	62031904	62115613	83709	62073758.5	6.875	20.3402777777778	6.875	11.0972222222222	6.875	18.1875	0.619524405506883	0.337999317173097
2	62115617	62116516	899	62116066.5	2.02083333333333	6.29861111111111	2.02083333333333	8.56944444444444	2.02083333333333	4.89583333333333	0.23581847649919	0.320837927232635
2	62116558	62117310	752	62116934	0.791666666666666	5.02777777777778	0.791666666666666	9.24999999999999	0.791666666666666	3.29166666666667	0.0855855855855856	0.157458563535912
2	62117339	62118120	781	62117729.5	0.5	4.42361111111111	0.5	8.65277777777777	0.5	3.27083333333333	0.057784911717496	0.113029827315542
2	62118123	62118858	735	62118490.5	1.79166666666667	5.09027777777778	1.79166666666667	9.20833333333333	1.79166666666667	3.85416666666667	0.194570135746607	0.351978171896316
2	62118919	62123332	4413	62121125.5	2.25	7.18055555555556	2.25	7.77777777777777	2.25	5.83333333333334	0.289285714285715	0.313346228239845
2	62123338	62454245	330907	62288791.5	2.27083333333334	14.6388888888889	2.27083333333334	9.0625	2.27083333333334	12.1875	0.250574712643678	0.155123339658444
2	62462998	62486211	23213	62474604.5	1.52083333333333	9.95833333333333	1.52083333333333	10.3263888888889	1.52083333333333	6.70833333333333	0.147276395427034	0.152719665271966
2	62486298	62502156	15858	62494227	1.58333333333333	7.04166666666667	1.58333333333333	6.94444444444445	1.58333333333333	5.04166666666667	0.228	0.224852071005917
2	62502189	62688963	186774	62595576	1.5	11.9444444444444	1.5	9.88888888888889	1.5	9.91666666666667	0.151685393258427	0.125581395348837
2	62688965	62735290	46325	62712127.5	3.41666666666667	5.07638888888889	3.41666666666667	12.375	3.41666666666667	3.77083333333334	0.276094276094276	0.673050615595075
2	62735499	62747593	12094	62741546	2.64583333333333	4.98611111111111	2.64583333333333	11.5972222222222	2.64583333333333	4.64583333333334	0.22814371257485	0.530640668523677
2	62747786	62940182	192396	62843984	3.97916666666667	8.72916666666667	3.97916666666667	12.5763888888889	3.97916666666667	8.16666666666667	0.316399779127554	0.455847255369928
2	62982193	63034386	52193	63008289.5	4.77083333333333	14.7083333333333	4.77083333333333	15.9930555555556	4.77083333333333	13.4583333333333	0.298306556665219	0.324362606232295
2	63034389	63037478	3089	63035933.5	2	10.625	2	15.6805555555556	2	9.66666666666667	0.127546501328609	0.188235294117647
2	63037520	63130314	92794	63083917	3.5	12.5208333333333	3.5	15.5416666666667	3.5	12.1875	0.225201072386059	0.279534109816971
2	63130335	63152539	22204	63141437	5.79166666666667	14.4722222222222	5.79166666666667	14.7083333333333	5.79166666666667	12.8333333333333	0.393767705382436	0.400191938579654
2	63152566	63297014	144448	63224790	14.7916666666667	26.7777777777778	14.7916666666667	20.7638888888889	14.7916666666667	24.8541666666667	0.712374581939799	0.552385892116183
2	63378787	63604910	226123	63491848.5	0.125	19.7638888888889	0.125	15.3888888888889	0.125	19.1875	0.0081227436823105	0.0063246661981729
2	63604993	63611430	6437	63608211.5	3.5	12.3055555555556	3.5	14.1944444444444	3.5	9.70833333333334	0.246575342465753	0.284424379232506
2	63611445	63620361	8916	63615903	1.04166666666667	7.3888888888889	1.04166666666667	11.7777777777778	1.04166666666667	6.79166666666667	0.0884433962264151	0.140977443609022
2	63620382	63682802	62420	63651592	0.958333333333334	10.5486111111111	0.958333333333334	12.9583333333333	0.958333333333334	10.2708333333333	0.0739549839228296	0.0908492429229757
2	63682845	63874842	191997	63778843.5	2.79166666666667	13.6111111111111	2.79166666666667	11.9027777777778	2.79166666666667	12.2708333333333	0.234539089848308	0.205102040816327
2	64933446	64982194	48748	64957820	1.375	7.32638888888889	1.375	4.625	1.375	6.1875	0.297297297297297	0.187677725118483
2	64982230	64983636	1406	64982933	2.91666666666667	10.4166666666667	2.91666666666667	6.02777777777778	2.91666666666667	9.08333333333333	0.483870967741936	0.28
2	64983667	65235281	251614	65109474	1.625	13.0069444444444	1.625	11.4722222222222	1.625	11.7083333333333	0.141646489104116	0.12493326214629
2	65818277	66115667	297390	65966972	0.875000000000001	7.84027777777778	0.875000000000001	10.5694444444444	0.875000000000001	7.08333333333333	0.0827858081471749	0.111603188662533
2	66115675	66488105	372430	66301890	1.6875	5.78472222222222	1.6875	10.2083333333333	1.6875	4.85416666666667	0.165306122448979	0.29171668667467
2	66488121	66744612	256491	66616366.5	2.3125	8.34027777777778	2.3125	9.09027777777778	2.3125	7.04166666666667	0.254392666157372	0.277268942547877
2	66744630	67230406	485776	66987518	0.375000000000002	7.89583333333333	0.375000000000002	10.1041666666667	0.375000000000002	6.875	0.0371134020618558	0.0474934036939316
2	67254918	67537094	282176	67396006	2.625	8.74305555555555	2.625	11.9861111111111	2.625	8.04166666666667	0.219003476245655	0.300238284352661
2	67537100	67857646	320546	67697373	0.562500000000007	10.9097222222222	0.562500000000007	13.4236111111111	0.562500000000007	10.5	0.0419037765131925	0.0515595162317002
2	68036229	68138557	102328	68087393	2.1875	8.44444444444445	2.1875	7.34027777777778	2.1875	8.04166666666667	0.298013245033113	0.259046052631579
2	68138886	68173513	34627	68156199.5	4.35416666666667	20.625	4.35416666666667	11.6875	4.35416666666667	20.5	0.372549019607843	0.211111111111111
2	68173652	68177961	4309	68175806.5	4.27083333333333	24.6458333333333	4.27083333333333	15.3263888888889	4.27083333333333	24.4375	0.278658812868147	0.173288250211327
2	68178102	68219380	41278	68198741	0.166666666666664	12.7222222222222	0.166666666666664	11.3611111111111	0.166666666666664	12.3541666666667	0.0146699266503665	0.0131004366812225
2	68219400	68527541	308141	68373470.5	0.333333333333334	14.3402777777778	0.333333333333334	13.0833333333333	0.333333333333334	13.1041666666667	0.0254777070063695	0.0232445520581114
2	68528348	68593344	64996	68560846	2.95833333333334	11.1944444444444	2.95833333333334	12.1111111111111	2.95833333333334	9.20833333333333	0.244266055045872	0.264267990074442
2	68593359	68623691	30332	68608525	4.875	18.7291666666667	4.875	13.4305555555556	4.875	18.0625	0.362978283350569	0.260289210233593
2	68654318	68655959	1641	68655138.5	2.08333333333333	17.875	2.08333333333333	15.8888888888889	2.08333333333333	17.375	0.131118881118881	0.116550116550116
2	68733089	68832850	99761	68782969.5	0.770833333333336	15.0486111111111	0.770833333333336	13.3958333333333	0.770833333333336	14.3541666666667	0.0575427682737171	0.0512228887863407
2	68922966	68931308	8342	68927137	0.541666666666667	2.99305555555556	0.541666666666667	9.05555555555555	0.541666666666667	1.41666666666667	0.0598159509202454	0.180974477958237
2	68931329	68944537	13208	68937933	1.52083333333333	2.84027777777778	1.52083333333333	6.88194444444444	1.52083333333333	1.83333333333333	0.220988900100908	0.535452322738387
2	68944558	69025767	81209	68985162.5	0.687499999999999	5.47916666666667	0.687499999999999	9.67361111111111	0.687499999999999	4.58333333333333	0.0710696338837042	0.125475285171103
2	69025791	69038672	12881	69032231.5	0.0833333333333351	4.27777777777778	0.0833333333333351	10.6041666666667	0.0833333333333351	2.70833333333334	0.00785854616895891	0.0194805194805199
2	69226120	69374576	148456	69300348	0.354166666666664	10.5555555555556	0.354166666666664	14.4513888888889	0.354166666666664	9.79166666666667	0.024507448342143	0.0335526315789471
2	69374579	69384533	9954	69379556	11.6875	22.9930555555556	11.6875	12.7569444444444	11.6875	21.7291666666667	0.916167664670659	0.508305647840531
2	69384714	69387294	2580	69386004	4	19.2083333333333	4	11.1944444444444	4	17.7916666666667	0.357320099255583	0.20824295010846
2	69387326	69598194	210868	69492760	2.97916666666667	10.7986111111111	2.97916666666667	9.33333333333333	2.97916666666667	7.5	0.319196428571428	0.27588424437299
2	69598243	69657040	58797	69627641.5	1.66666666666667	7.91666666666667	1.66666666666667	17.0833333333333	1.66666666666667	5.66666666666667	0.0975609756097561	0.210526315789474
2	69657582	69686155	28573	69671868.5	1.08333333333333	3.39583333333333	1.08333333333333	5.52777777777778	1.08333333333333	2.72916666666667	0.195979899497487	0.319018404907975
2	69687476	69792630	105154	69740053	1.66666666666667	6.50694444444445	1.66666666666667	7.54861111111111	1.66666666666667	5.85416666666667	0.220791168353266	0.256136606189968
2	70335554	70425719	90165	70380636.5	5.45833333333334	12.1319444444444	5.45833333333334	11.5694444444444	5.45833333333334	8.70833333333334	0.471788715486195	0.449914138523183
2	70858932	70915314	56382	70887123	2.54166666666667	11.2222222222222	2.54166666666667	6.72569444444445	2.54166666666667	11.0416666666667	0.377903975219411	0.226485148514852
2	70915315	71059710	144395	70987512.5	0.958333333333335	7.69444444444444	0.958333333333335	11.9895833333333	0.958333333333335	7.5625	0.0799304952215466	0.124548736462094
2	71100153	71182097	81944	71141125	3.6875	15.0138888888889	3.6875	7.71527777777778	3.6875	13.9583333333333	0.477947794779478	0.245605920444034
2	71228049	71372623	144574	71300336	4.08333333333334	10.5277777777778	4.08333333333334	7.64930555555556	4.08333333333334	8.8125	0.533817521561507	0.387862796833773
2	71372673	71941043	568370	71656858	1.16666666666667	7.4375	1.16666666666667	6.51388888888889	1.16666666666667	5.39583333333333	0.17910447761194	0.156862745098039
2	71941067	71999861	58794	71970464	6.77083333333334	23.4305555555556	6.77083333333334	12.2430555555556	6.77083333333334	22.6041666666667	0.553034600113443	0.288974510966212
2	71999900	72187904	188004	72093902	5.97916666666667	15.8888888888889	5.97916666666667	11.0208333333333	5.97916666666667	14.6666666666667	0.542533081285444	0.376311188811189
2	72525992	72734268	208276	72630130	0.250000000000001	10.1597222222222	0.250000000000001	10.1388888888889	0.250000000000001	9.5	0.0246575342465755	0.0246069719753931
2	73086999	73088689	1690	73087844	0.333333333333333	7.56250000000001	0.333333333333333	4.5	0.333333333333333	1.20833333333334	0.0740740740740741	0.0440771349862258
2	73088713	73302060	213347	73195386.5	0.770833333333332	15	0.770833333333332	10.8402777777778	0.770833333333332	14.1666666666667	0.0711082639333759	0.0513888888888888
2	73302151	73336246	34095	73319198.5	1.33333333333334	13.1805555555556	1.33333333333334	8.55555555555556	1.33333333333334	13.1041666666667	0.155844155844156	0.101159114857745
2	73342098	73505248	163150	73423673	0.708333333333336	6.13888888888889	0.708333333333336	6.47916666666667	0.708333333333336	4.60416666666667	0.109324758842444	0.115384615384616
2	73506465	73682293	175828	73594379	0.479166666666669	5.18055555555556	0.479166666666669	9.67708333333333	0.479166666666669	4.79166666666667	0.0495156081808399	0.0924932975871318
2	73682796	73707021	24225	73694908.5	0.458333333333334	2.89583333333333	0.458333333333334	9.83333333333333	0.458333333333334	0.541666666666667	0.0466101694915255	0.158273381294964
2	73707031	73724390	17359	73715710.5	1.14583333333333	2.39583333333334	1.14583333333333	8.8125	1.14583333333333	-0.729166666666665	0.130023640661939	0.478260869565218
2	73724494	73786299	61805	73755396.5	3.58333333333333	6.5	3.58333333333333	9.91666666666667	3.58333333333333	2.95833333333333	0.361344537815126	0.551282051282051
2	73786333	73812061	25728	73799197	3.0625	5.56944444444444	3.0625	6.77083333333334	3.0625	4.20833333333333	0.452307692307692	0.549875311720699
2	73812075	73901722	89647	73856898.5	10.5208333333333	20.2638888888889	10.5208333333333	11.0208333333333	10.5208333333333	19.2708333333333	0.954631379962193	0.519191226867718
2	73901748	73914164	12416	73907956	10.9375	21.1111111111111	10.9375	14.1875	10.9375	20.3125	0.770925110132159	0.518092105263158
2	73914192	73916210	2018	73915201	8.91666666666667	17	8.91666666666667	14.9166666666667	8.91666666666667	16.375	0.597765363128492	0.524509803921569
2	73916218	73917472	1254	73916845	7.39583333333333	12.0972222222222	7.39583333333333	11.5625	7.39583333333333	11.6875	0.63963963963964	0.611366245694604
2	73917502	73919756	2254	73918629	4.95833333333333	10.4861111111111	4.95833333333333	11.4583333333333	4.95833333333333	8.9375	0.432727272727273	0.472847682119205
2	73919913	73970867	50954	73945390	6.5	11.0208333333333	6.5	13.0416666666667	6.5	10.2083333333333	0.498402555910543	0.589792060491493
2	73970896	73975665	4769	73973280.5	2.64583333333334	5.54861111111112	2.64583333333334	10.5347222222222	2.64583333333334	4.10416666666667	0.251153592617008	0.476846057571965
2	74724521	74942489	217968	74833505	5.9375	16.7222222222222	5.9375	16.2013888888889	5.9375	15.3958333333333	0.366480925846549	0.355066445182724
2	74942490	75187279	244789	75064884.5	11.2083333333333	20.1458333333333	11.2083333333333	16.0763888888889	11.2083333333333	19.7083333333333	0.69719222462203	0.55635987590486
2	75187286	75190184	2898	75188735	1.625	8.36111111111111	1.625	9.93055555555555	1.625	7.6875	0.163636363636364	0.194352159468438
2	75190202	75237836	47634	75214019	5.20833333333333	13.4166666666667	5.20833333333333	14	5.20833333333333	12.0208333333333	0.372023809523809	0.388198757763975
2	75237863	75936274	698411	75587068.5	7.08333333333333	19.2291666666667	7.08333333333333	16.2430555555556	7.08333333333333	17.5416666666667	0.436083796494228	0.368364030335861
2	75936290	76049872	113582	75993081	5.16666666666667	21.0208333333333	5.16666666666667	15.8333333333333	5.16666666666667	20.9166666666667	0.326315789473684	0.245787908820614
2	76050205	76084310	34105	76067257.5	0.104166666666665	13.1597222222222	0.104166666666665	11.7847222222222	0.104166666666665	12.8125	0.00883912787271643	0.00791556728232178
2	76272289	76674565	402276	76473427	4.29166666666667	19.3055555555556	4.29166666666667	12.1215277777778	4.29166666666667	18.375	0.354053279862503	0.222302158273381
2	76674575	76816928	142353	76745751.5	2.77083333333333	19.3888888888889	2.77083333333333	13.1458333333333	2.77083333333333	16.2291666666667	0.210776545166402	0.142908309455587
2	76816973	77200786	383813	77008879.5	3.4375	11.0486111111111	3.4375	13.7847222222222	3.4375	9.79166666666667	0.249370277078086	0.311125078566939
2	77201138	77534167	333029	77367652.5	2.10416666666667	14.5625	2.10416666666667	18.5208333333333	2.10416666666667	12.9166666666667	0.113610798650169	0.144492131616595
2	77538270	77593774	55504	77566022	3.10416666666666	17.8263888888889	3.10416666666666	10.7222222222222	3.10416666666666	14.6666666666667	0.289507772020725	0.174133229450721
2	77593800	77682681	88881	77638240.5	4.10416666666667	22.0694444444444	4.10416666666667	14.0347222222222	4.10416666666667	17.0416666666667	0.292429490351311	0.185966016362492
2	77692173	77768927	76754	77730550	0.0208333333333334	11.2152777777778	0.0208333333333334	13.2291666666667	0.0208333333333334	11.1666666666667	0.0015748031496063	0.00185758513931889
2	77768948	77770397	1449	77769672.5	1.27083333333333	8.92361111111111	1.27083333333333	15.3541666666667	1.27083333333333	5.125	0.0827679782903663	0.142412451361868
2	77870068	77899464	29396	77884766	2.41666666666667	9.92361111111111	2.41666666666667	10.3402777777778	2.41666666666667	6.0625	0.233713901947616	0.243526941917425
2	77899487	78037334	137847	77968410.5	3.02083333333333	10.5902777777778	3.02083333333333	9.14583333333333	3.02083333333333	7.3125	0.330296127562642	0.285245901639344
2	78037338	78214930	177592	78126134	5	11.4930555555556	5	10.0972222222222	5	8.33333333333333	0.495185694635488	0.435045317220544
[truncated: 8,473 more rows]
