# Supplementary material for: Characterization of introgression from the teosinte Zea mays ssp. mexicana to Mexican highland maize
Source: PeerJ. 2019 May 3;7:e6815. doi: 10.7717/peerj.6815 (PMC6501764; doi:10.7717/peerj.6815)
Supplement: Supplemental Information 8 — Local recombination rate in the RV × PT cross, estimated at every marker. [file peerj-07-6815-s008.txt]

#maize - Chromosome 1 - spline:new("MMSpline3", name = "spline", visible = TRUE, persistent = TRUE, color = "#B800FF", spar = 0.05, df = 10)
#maize - Chromosome 10 - spline:new("MMSpline3", name = "spline", visible = TRUE, persistent = TRUE, color = "#B800FF", spar = 0.05, df = 10)
#maize - Chromosome 2 - spline:new("MMSpline3", name = "spline", visible = TRUE, persistent = TRUE, color = "#FF00D7", spar = 0.05, df = 10)
#maize - Chromosome 3 - spline:new("MMSpline3", name = "spline", visible = TRUE, persistent = TRUE, color = "#1421dc", spar = 0.05, df = 10)
#maize - Chromosome 4 - spline:new("MMSpline3", name = "spline", visible = TRUE, persistent = TRUE, color = "#2933ff", spar = 0.05, df = 10)
#maize - Chromosome 5 - spline:new("MMSpline3", name = "spline", visible = TRUE, persistent = TRUE, color = "#191bc3", spar = 0.05, df = 10)
#maize - Chromosome 6 - spline:new("MMSpline3", name = "spline", visible = TRUE, persistent = TRUE, color = "#1830c0", spar = 0.05, df = 10)
#maize - Chromosome 7 - spline:new("MMSpline3", name = "spline", visible = TRUE, persistent = TRUE, color = "#1b00d7", spar = 0.05, df = 10)
#maize - Chromosome 8 - spline:new("MMSpline3", name = "spline", visible = TRUE, persistent = TRUE, color = "#B800FF", spar = 0.05, df = 10)
#maize - Chromosome 9 - spline:new("MMSpline3", name = "spline", visible = TRUE, persistent = TRUE, color = "#2600d7", spar = 0.05, df = 10)

"set" "map" "mkr" "phys" "gen" "vld" "spline"
"maize" "Chromosome 1" "S1-  2101805" 2101805 0 TRUE 7.77
"maize" "Chromosome 1" "S1-  2782065" 2782065 7.970311 TRUE 6.39
"maize" "Chromosome 1" "S1-  2950268" 2950268 8.263563 TRUE 5.73
"maize" "Chromosome 1" "S1-  3658876" 3658876 10.343661 TRUE 3.36
"maize" "Chromosome 1" "S1-  4595440" 4595440 12.724913 TRUE 2.4
"maize" "Chromosome 1" "S1-  4609391" 4609391 13.01906 TRUE 2.4
"maize" "Chromosome 1" "S1-  5082453" 5082453 14.202406 TRUE 2.47
"maize" "Chromosome 1" "S1-  5646683" 5646683 15.684125 TRUE 2.36
"maize" "Chromosome 1" "S1-  5806871" 5806871 15.978376 TRUE 2.28
"maize" "Chromosome 1" "S1-  6231123" 6231123 17.378231 TRUE 2.08
"maize" "Chromosome 1" "S1-  6918635" 6918635 18.202225 TRUE 1.85
"maize" "Chromosome 1" "S1-  7154675" 7154675 18.792164 TRUE 1.81
"maize" "Chromosome 1" "S1-  7308216" 7308216 19.086546 TRUE 1.82
"maize" "Chromosome 1" "S1-  8019822" 8019822 20.26992 TRUE 2.05
"maize" "Chromosome 1" "S1-  8364489" 8364489 20.859761 TRUE 2.28
"maize" "Chromosome 1" "S1-  8534173" 8534173 21.154251 TRUE 2.38
"maize" "Chromosome 1" "S1-  8554339" 8554339 21.448697 TRUE 2.38
"maize" "Chromosome 1" "S1-  8632213" 8632213 22.334877 TRUE 2.41
"maize" "Chromosome 1" "S1-  9186846" 9186846 22.924626 TRUE 2.45
"maize" "Chromosome 1" "S1-  9576587" 9576587 24.406689 TRUE 2.32
"maize" "Chromosome 1" "S1-  9951917" 9951917 24.701022 TRUE 2.06
"maize" "Chromosome 1" "S1- 10221063" 10221063 25.587458 TRUE 1.83
"maize" "Chromosome 1" "S1- 10965121" 10965121 26.771232 TRUE 1.27
"maize" "Chromosome 1" "S1- 12346361" 12346361 27.657439 TRUE 0.76
"maize" "Chromosome 1" "S1- 13642338" 13642338 29.110969 TRUE 1.07
"maize" "Chromosome 1" "S1- 14638329" 14638329 30.190901 TRUE 1.79
"maize" "Chromosome 1" "S1- 14958884" 14958884 30.485256 TRUE 2.09
"maize" "Chromosome 1" "S1- 15170987" 15170987 31.371473 TRUE 2.25
"maize" "Chromosome 1" "S1- 15268694" 15268694 31.665914 TRUE 2.29
"maize" "Chromosome 1" "S1- 15353772" 15353772 31.960431 TRUE 2.31
"maize" "Chromosome 1" "S1- 15474311" 15474311 32.254953 TRUE 2.31
"maize" "Chromosome 1" "S1- 15515114" 15515114 32.549474 TRUE 2.3
"maize" "Chromosome 1" "S1- 15808008" 15808008 32.843916 TRUE 2.26
"maize" "Chromosome 1" "S1- 16067354" 16067354 33.730085 TRUE 2.29
"maize" "Chromosome 1" "S1- 16438273" 16438273 34.023811 TRUE 2.34
"maize" "Chromosome 1" "S1- 19233795" 19233795 39.793509 TRUE 1.04
"maize" "Chromosome 1" "S1- 19495747" 19495747 40.087318 TRUE 0.83
"maize" "Chromosome 1" "S1- 19703490" 19703490 40.381855 TRUE 0.73
"maize" "Chromosome 1" "S1- 21601084" 21601084 40.676241 TRUE 0.56
"maize" "Chromosome 1" "S1- 22595538" 22595538 42.157795 TRUE 0.83
"maize" "Chromosome 1" "S1- 25399042" 25399042 44.811598 TRUE 1.12
"maize" "Chromosome 1" "S1- 25409818" 25409818 45.479034 TRUE 1.12
"maize" "Chromosome 1" "S1- 26576391" 26576391 45.773374 TRUE 0.92
"maize" "Chromosome 1" "S1- 27627138" 27627138 47.255204 TRUE 0.79
"maize" "Chromosome 1" "S1- 27777054" 27777054 47.54959 TRUE 0.78
"maize" "Chromosome 1" "S1- 28867077" 28867077 47.844132 TRUE 0.84
"maize" "Chromosome 1" "S1- 29031471" 29031471 48.138638 TRUE 0.87
"maize" "Chromosome 1" "S1- 29542215" 29542215 48.728541 TRUE 0.82
"maize" "Chromosome 1" "S1- 31254465" 31254465 49.912257 TRUE 0.45
"maize" "Chromosome 1" "S1- 32990373" 32990373 50.206468 TRUE 0.27
"maize" "Chromosome 1" "S1- 48650888" 48650888 53.471846 TRUE 0.4
"maize" "Chromosome 1" "S1- 51531645" 51531645 54.655572 TRUE 0.61
"maize" "Chromosome 1" "S1- 52920269" 52920269 54.949744 TRUE 0.78
"maize" "Chromosome 1" "S1- 53618592" 53618592 57.333662 TRUE 0.91
"maize" "Chromosome 1" "S1- 56079392" 56079392 58.219771 TRUE 1.08
"maize" "Chromosome 1" "S1- 57301382" 57301382 60.604298 TRUE 0.91
"maize" "Chromosome 1" "S1- 59510346" 59510346 61.788382 TRUE 0.51
"maize" "Chromosome 1" "S1- 60811122" 60811122 62.082826 TRUE 0.32
"maize" "Chromosome 1" "S1- 62534834" 62534834 62.673072 TRUE 0.21
"maize" "Chromosome 1" "S1- 64723547" 64723547 62.967628 TRUE 0.39
"maize" "Chromosome 1" "S1- 64726627" 64726627 63.262217 TRUE 0.39
"maize" "Chromosome 1" "S1- 64971748" 64971748 63.5568 TRUE 0.43
"maize" "Chromosome 1" "S1- 65736988" 65736988 63.851342 TRUE 0.64
"maize" "Chromosome 1" "S1- 67438953" 67438953 64.44137 TRUE 0.73
"maize" "Chromosome 1" "S1- 67778347" 67778347 65.625316 TRUE 0.62
"maize" "Chromosome 1" "S1- 70778030" 70778030 66.215437 TRUE 0.13
"maize" "Chromosome 1" "S1- 71590148" 71590148 66.509931 TRUE 0.18
"maize" "Chromosome 1" "S1- 75157949" 75157949 67.099706 TRUE 0.53
"maize" "Chromosome 1" "S1- 79329941" 79329941 70.398465 TRUE 0.72
"maize" "Chromosome 1" "S1- 79715318" 79715318 70.692028 TRUE 0.73
"maize" "Chromosome 1" "S1- 85844784" 85844784 75.852798 TRUE 1.1
"maize" "Chromosome 1" "S1- 86955562" 86955562 77.036071 TRUE 1.21
"maize" "Chromosome 1" "S1- 88142785" 88142785 78.81785 TRUE 1.35
"maize" "Chromosome 1" "S1- 88456139" 88456139 79.112101 TRUE 1.35
"maize" "Chromosome 1" "S1- 89243692" 89243692 80.29595 TRUE 1.04
"maize" "Chromosome 1" "S1- 90963662" 90963662 81.182434 TRUE 0.44
"maize" "Chromosome 1" "S1- 91760389" 91760389 81.476927 TRUE 0.54
"maize" "Chromosome 1" "S1- 92252405" 92252405 81.771495 TRUE 0.6
"maize" "Chromosome 1" "S1- 92522132" 92522132 82.066014 TRUE 0.57
"maize" "Chromosome 1" "S1- 92796019" 92796019 82.360567 TRUE 0.51
"maize" "Chromosome 1" "S1- 97517416" 97517416 83.247175 TRUE 0.18
"maize" "Chromosome 1" "S1-103109052" 103109052 84.729993 TRUE 0.25
"maize" "Chromosome 1" "S1-103428925" 103428925 85.02442 TRUE 0.23
"maize" "Chromosome 1" "S1-106905090" 106905090 85.318998 TRUE 0.09
"maize" "Chromosome 1" "S1-114811754" 114811754 85.613577 TRUE 0.04
"maize" "Chromosome 1" "S1-119419559" 119419559 85.908155 TRUE 0.08
"maize" "Chromosome 1" "S1-121666132" 121666132 86.202691 TRUE 0.08
"maize" "Chromosome 1" "S1-161042843" 161042843 88.269526 TRUE 0.16
"maize" "Chromosome 1" "S1-161551228" 161551228 88.563889 TRUE 0.16
"maize" "Chromosome 1" "S1-164526203" 164526203 89.758413 TRUE 0.19
"maize" "Chromosome 1" "S1-166009744" 166009744 90.180476 TRUE 0.21
"maize" "Chromosome 1" "S1-172926326" 172926326 90.770555 TRUE 0.31
"maize" "Chromosome 1" "S1-175669311" 175669311 92.253492 TRUE 0.31
"maize" "Chromosome 1" "S1-177173347" 177173347 93.140032 TRUE 0.27
"maize" "Chromosome 1" "S1-180427084" 180427084 93.43455 TRUE 0.51
"maize" "Chromosome 1" "S1-182126389" 182126389 94.618326 TRUE 0.9
"maize" "Chromosome 1" "S1-182419000" 182419000 95.86281 TRUE 0.97
"maize" "Chromosome 1" "S1-184014962" 184014962 96.688362 TRUE 0.81
"maize" "Chromosome 1" "S1-188060310" 188060310 98.46999 TRUE 0.34
"maize" "Chromosome 1" "S1-189123630" 189123630 98.764358 TRUE 0.59
"maize" "Chromosome 1" "S1-189438564" 189438564 99.058921 TRUE 0.7
"maize" "Chromosome 1" "S1-190176128" 190176128 99.353216 TRUE 1.08
"maize" "Chromosome 1" "S1-191546767" 191546767 101.737097 TRUE 1.38
"maize" "Chromosome 1" "S1-192525070" 192525070 102.920753 TRUE 0.91
"maize" "Chromosome 1" "S1-193556103" 193556103 103.215193 TRUE 0.73
"maize" "Chromosome 1" "S1-193899011" 193899011 103.509523 TRUE 0.93
"maize" "Chromosome 1" "S1-195364924" 195364924 105.591477 TRUE 1.64
"maize" "Chromosome 1" "S1-195518002" 195518002 106.181234 TRUE 1.67
"maize" "Chromosome 1" "S1-196287897" 196287897 106.889181 TRUE 1.68
"maize" "Chromosome 1" "S1-196725361" 196725361 107.95445 TRUE 1.61
"maize" "Chromosome 1" "S1-196736473" 196736473 108.248603 TRUE 1.61
"maize" "Chromosome 1" "S1-198776090" 198776090 110.93631 TRUE 1.25
"maize" "Chromosome 1" "S1-200514858" 200514858 112.419112 TRUE 1.09
"maize" "Chromosome 1" "S1-200836850" 200836850 113.305891 TRUE 1.09
"maize" "Chromosome 1" "S1-200896823" 200896823 113.600388 TRUE 1.09
"maize" "Chromosome 1" "S1-201669589" 201669589 114.190524 TRUE 1
"maize" "Chromosome 1" "S1-203754889" 203754889 115.673868 TRUE 0.81
"maize" "Chromosome 1" "S1-204330512" 204330512 116.560486 TRUE 0.86
"maize" "Chromosome 1" "S1-205609520" 205609520 117.744934 TRUE 1.13
"maize" "Chromosome 1" "S1-206161755" 206161755 118.039147 TRUE 1.24
"maize" "Chromosome 1" "S1-207768376" 207768376 120.424714 TRUE 1.08
"maize" "Chromosome 1" "S1-211311295" 211311295 122.507491 TRUE 0.8
"maize" "Chromosome 1" "S1-211485189" 211485189 123.097383 TRUE 0.84
"maize" "Chromosome 1" "S1-211489660" 211489660 123.391908 TRUE 0.84
"maize" "Chromosome 1" "S1-211579416" 211579416 123.686477 TRUE 0.83
"maize" "Chromosome 1" "S1-212550097" 212550097 123.981045 TRUE 0.56
"maize" "Chromosome 1" "S1-213142786" 213142786 124.275607 TRUE 0.52
"maize" "Chromosome 1" "S1-213965885" 213965885 124.570053 TRUE 0.53
"maize" "Chromosome 1" "S1-216048586" 216048586 125.753891 TRUE 0.48
"maize" "Chromosome 1" "S1-216492926" 216492926 126.04832 TRUE 0.47
"maize" "Chromosome 1" "S1-217504573" 217504573 126.342712 TRUE 0.57
"maize" "Chromosome 1" "S1-219954005" 219954005 127.824947 TRUE 0.38
"maize" "Chromosome 1" "S1-220169301" 220169301 128.119285 TRUE 0.3
"maize" "Chromosome 1" "S1-223631240" 223631240 129.005881 TRUE 0.94
"maize" "Chromosome 1" "S1-224166361" 224166361 129.300023 TRUE 1.38
"maize" "Chromosome 1" "S1-225651255" 225651255 132.243106 TRUE 1.83
"maize" "Chromosome 1" "S1-226281474" 226281474 133.448496 TRUE 1.48
"maize" "Chromosome 1" "S1-227990778" 227990778 134.930805 TRUE 0.71
"maize" "Chromosome 1" "S1-228209364" 228209364 135.225147 TRUE 0.7
"maize" "Chromosome 1" "S1-229877628" 229877628 136.11162 TRUE 0.67
"maize" "Chromosome 1" "S1-232592593" 232592593 137.893919 TRUE 0.49
"maize" "Chromosome 1" "S1-234316664" 234316664 138.780374 TRUE 0.46
"maize" "Chromosome 1" "S1-236849730" 236849730 139.96446 TRUE 0.91
"maize" "Chromosome 1" "S1-236967494" 236967494 140.413805 TRUE 0.94
"maize" "Chromosome 1" "S1-237581732" 237581732 140.898149 TRUE 0.92
"maize" "Chromosome 1" "S1-237946017" 237946017 141.192653 TRUE 0.83
"maize" "Chromosome 1" "S1-238024993" 238024993 141.782715 TRUE 0.81
"maize" "Chromosome 1" "S1-240099493" 240099493 142.372713 TRUE 0.48
"maize" "Chromosome 1" "S1-240440790" 240440790 142.962822 TRUE 0.45
"maize" "Chromosome 1" "S1-241278018" 241278018 143.257343 TRUE 0.39
"maize" "Chromosome 1" "S1-242768003" 242768003 143.5519 TRUE 0.45
"maize" "Chromosome 1" "S1-243274643" 243274643 143.846426 TRUE 0.53
"maize" "Chromosome 1" "S1-243711349" 243711349 144.436239 TRUE 0.62
"maize" "Chromosome 1" "S1-247686040" 247686040 147.122967 TRUE 0.64
"maize" "Chromosome 1" "S1-251100705" 251100705 149.507578 TRUE 0.79
"maize" "Chromosome 1" "S1-252435011" 252435011 150.701582 TRUE 1.23
"maize" "Chromosome 1" "S1-252986316" 252986316 151.123667 TRUE 2.01
"maize" "Chromosome 1" "S1-253208802" 253208802 151.418155 TRUE 2.63
"maize" "Chromosome 1" "S1-253566518" 253566518 152.304624 TRUE 3.44
"maize" "Chromosome 1" "S1-254135794" 254135794 155.11099 TRUE 3.3
"maize" "Chromosome 1" "S1-254620137" 254620137 157.499272 TRUE 2.5
"maize" "Chromosome 1" "S1-257548726" 257548726 158.981688 TRUE 0.08
"maize" "Chromosome 1" "S1-262216066" 262216066 159.86521 TRUE 0.49
"maize" "Chromosome 1" "S1-263006064" 263006064 160.159617 TRUE 0.75
"maize" "Chromosome 1" "S1-264564141" 264564141 161.64197 TRUE 0.91
"maize" "Chromosome 1" "S1-264919576" 264919576 162.07498 TRUE 0.84
"maize" "Chromosome 1" "S1-268233517" 268233517 163.92388 TRUE 0.37
"maize" "Chromosome 1" "S1-270092926" 270092926 164.218348 TRUE 0.44
"maize" "Chromosome 1" "S1-271414942" 271414942 165.402357 TRUE 0.47
"maize" "Chromosome 1" "S1-272521901" 272521901 165.696764 TRUE 0.35
"maize" "Chromosome 1" "S1-274132410" 274132410 166.286806 TRUE 1.07
"maize" "Chromosome 1" "S1-274790902" 274790902 166.876831 TRUE 1.94
"maize" "Chromosome 1" "S1-274920210" 274920210 167.466839 TRUE 2.08
"maize" "Chromosome 1" "S1-275098964" 275098964 168.353361 TRUE 2.03
"maize" "Chromosome 1" "S1-275449932" 275449932 168.943236 TRUE 1.7
"maize" "Chromosome 1" "S1-276275087" 276275087 170.425668 TRUE 1.08
"maize" "Chromosome 1" "S1-278101686" 278101686 171.015448 TRUE 0.53
"maize" "Chromosome 1" "S1-279964027" 279964027 172.797266 TRUE 1.7
"maize" "Chromosome 1" "S1-280447410" 280447410 173.386987 TRUE 2.38
"maize" "Chromosome 1" "S1-281131048" 281131048 175.169162 TRUE 2.92
"maize" "Chromosome 1" "S1-281236179" 281236179 176.055685 TRUE 2.91
"maize" "Chromosome 1" "S1-281523283" 281523283 176.942397 TRUE 2.67
"maize" "Chromosome 1" "S1-281658429" 281658429 177.236863 TRUE 2.45
"maize" "Chromosome 1" "S1-281715876" 281715876 177.827067 TRUE 2.34
"maize" "Chromosome 1" "S1-281770558" 281770558 178.121618 TRUE 2.23
"maize" "Chromosome 1" "S1-282530668" 282530668 178.416207 TRUE 1.07
"maize" "Chromosome 1" "S1-282810496" 282810496 178.710801 TRUE 0.83
"maize" "Chromosome 1" "S1-282964167" 282964167 179.005357 TRUE 0.73
"maize" "Chromosome 1" "S1-283396556" 283396556 179.595486 TRUE 0.58
"maize" "Chromosome 1" "S1-285992047" 285992047 180.482085 TRUE 0.83
"maize" "Chromosome 1" "S1-287135639" 287135639 181.964766 TRUE 1.37
"maize" "Chromosome 1" "S1-288803816" 288803816 185.573096 TRUE 1.6
"maize" "Chromosome 1" "S1-289858649" 289858649 185.867507 TRUE 0.99
"maize" "Chromosome 1" "S1-290180261" 290180261 186.162041 TRUE 0.82
"maize" "Chromosome 1" "S1-290666283" 290666283 187.049066 TRUE 0.97
"maize" "Chromosome 1" "S1-291057947" 291057947 187.343449 TRUE 1.27
"maize" "Chromosome 1" "S1-292173820" 292173820 188.826757 TRUE 1.86
"maize" "Chromosome 1" "S1-293239508" 293239508 191.515678 TRUE 2.01
"maize" "Chromosome 1" "S1-294178635" 294178635 192.998049 TRUE 1.75
"maize" "Chromosome 1" "S1-294790212" 294790212 194.084091 TRUE 1.56
"maize" "Chromosome 1" "S1-295429660" 295429660 194.914387 TRUE 1.59
"maize" "Chromosome 1" "S1-295851363" 295851363 195.800889 TRUE 1.75
"maize" "Chromosome 1" "S1-296077513" 296077513 196.095254 TRUE 1.88
"maize" "Chromosome 1" "S1-296740951" 296740951 197.27868 TRUE 2.29
"maize" "Chromosome 1" "S1-298205681" 298205681 201.448665 TRUE 2.94
"maize" "Chromosome 1" "S1-300351674" 300351674 208.169455 TRUE 3.23
"maize" "Chromosome 10" "S10-  2010202" 2010202 0 TRUE 5.27
"maize" "Chromosome 10" "S10-  2262095" 2262095 0.8780477 TRUE 5.27
"maize" "Chromosome 10" "S10-  2405624" 2405624 2.3593541 TRUE 5.26
"maize" "Chromosome 10" "S10-  3064890" 3064890 8.1335198 TRUE 5.07
"maize" "Chromosome 10" "S10-  3195415" 3195415 9.019053 TRUE 5.01
"maize" "Chromosome 10" "S10-  4589441" 4589441 10.500537 TRUE 4.46
"maize" "Chromosome 10" "S10-  5008329" 5008329 15.9650653 TRUE 4.31
"maize" "Chromosome 10" "S10-  5384228" 5384228 17.1481984 TRUE 4.1
"maize" "Chromosome 10" "S10-  5731321" 5731321 18.3317088 TRUE 3.86
"maize" "Chromosome 10" "S10-  6140063" 6140063 21.6272506 TRUE 3.54
"maize" "Chromosome 10" "S10-  7107841" 7107841 24.3132634 TRUE 2.66
"maize" "Chromosome 10" "S10-  7642991" 7642991 25.1994583 TRUE 2.23
"maize" "Chromosome 10" "S10-  9382466" 9382466 25.4934671 TRUE 1.34
"maize" "Chromosome 10" "S10- 11313822" 11313822 29.4011272 TRUE 0.94
"maize" "Chromosome 10" "S10- 13346090" 13346090 31.1825519 TRUE 0.8
"maize" "Chromosome 10" "S10- 14007369" 14007369 31.4768178 TRUE 0.73
"maize" "Chromosome 10" "S10- 15553550" 15553550 32.6608378 TRUE 0.59
"maize" "Chromosome 10" "S10- 16535291" 16535291 33.5473321 TRUE 0.49
"maize" "Chromosome 10" "S10- 19079771" 19079771 34.1373986 TRUE 0.22
"maize" "Chromosome 10" "S10- 22140054" 22140054 34.4319295 TRUE 0.07
"maize" "Chromosome 10" "S10- 27468461" 27468461 34.7264227 TRUE 0.02
"maize" "Chromosome 10" "S10- 58006819" 58006819 35.6131141 TRUE 0.01
"maize" "Chromosome 10" "S10- 72828659" 72828659 36.2022273 TRUE 0.09
"maize" "Chromosome 10" "S10- 81886598" 81886598 37.1230408 TRUE 0.26
"maize" "Chromosome 10" "S10- 82627569" 82627569 37.7129733 TRUE 0.29
"maize" "Chromosome 10" "S10- 84084369" 84084369 38.599268 TRUE 0.36
"maize" "Chromosome 10" "S10- 87832495" 87832495 39.4855523 TRUE 0.33
"maize" "Chromosome 10" "S10- 88131409" 88131409 39.7799775 TRUE 0.32
"maize" "Chromosome 10" "S10- 89509753" 89509753 40.3699997 TRUE 0.26
"maize" "Chromosome 10" "S10- 91781694" 91781694 40.3699998 TRUE 0.26
"maize" "Chromosome 10" "S10- 93410530" 93410530 41.2559654 TRUE 0.26
"maize" "Chromosome 10" "S10-101881022" 101881022 43.0366008 TRUE 0.2
"maize" "Chromosome 10" "S10-103650141" 103650141 43.3309063 TRUE 0.19
"maize" "Chromosome 10" "S10-106446849" 106446849 43.9208806 TRUE 0.19
"maize" "Chromosome 10" "S10-108137353" 108137353 44.2153331 TRUE 0.18
"maize" "Chromosome 10" "S10-111019871" 111019871 44.8052328 TRUE 0.21
"maize" "Chromosome 10" "S10-114976941" 114976941 45.6914122 TRUE 0.37
"maize" "Chromosome 10" "S10-115591537" 115591537 45.9858541 TRUE 0.41
"maize" "Chromosome 10" "S10-116138854" 116138854 46.2803706 TRUE 0.43
"maize" "Chromosome 10" "S10-116915327" 116915327 46.5748125 TRUE 0.43
"maize" "Chromosome 10" "S10-117851456" 117851456 47.4610289 TRUE 0.39
"maize" "Chromosome 10" "S10-119974084" 119974084 47.7554759 TRUE 0.27
"maize" "Chromosome 10" "S10-120690107" 120690107 48.0499604 TRUE 0.23
"maize" "Chromosome 10" "S10-124319789" 124319789 48.6398931 TRUE 0.22
"maize" "Chromosome 10" "S10-125560037" 125560037 48.9343725 TRUE 0.29
"maize" "Chromosome 10" "S10-126674552" 126674552 49.2287765 TRUE 0.37
"maize" "Chromosome 10" "S10-127627396" 127627396 50.4119425 TRUE 0.45
"maize" "Chromosome 10" "S10-130307332" 130307332 51.2979993 TRUE 1.08
"maize" "Chromosome 10" "S10-130471910" 130471910 51.5923715 TRUE 1.14
"maize" "Chromosome 10" "S10-132053828" 132053828 52.4785232 TRUE 1.83
"maize" "Chromosome 10" "S10-132267904" 132267904 53.6618227 TRUE 1.92
"maize" "Chromosome 10" "S10-132277837" 132277837 54.2516525 TRUE 1.92
"maize" "Chromosome 10" "S10-132369592" 132369592 54.2516526 TRUE 1.96
"maize" "Chromosome 10" "S10-132565555" 132565555 54.841521 TRUE 2.02
"maize" "Chromosome 10" "S10-132725751" 132725751 55.1356985 TRUE 2.05
"maize" "Chromosome 10" "S10-132792830" 132792830 57.8205069 TRUE 2.05
"maize" "Chromosome 10" "S10-133300625" 133300625 58.1149466 TRUE 2.06
"maize" "Chromosome 10" "S10-134609257" 134609257 59.8459849 TRUE 2.05
"maize" "Chromosome 10" "S10-135200377" 135200377 60.2461957 TRUE 2.06
"maize" "Chromosome 10" "S10-135659847" 135659847 60.5406434 TRUE 2.1
"maize" "Chromosome 10" "S10-135825362" 135825362 61.4268803 TRUE 2.12
"maize" "Chromosome 10" "S10-136043853" 136043853 62.3130697 TRUE 2.13
"maize" "Chromosome 10" "S10-136141388" 136141388 62.6071751 TRUE 2.14
"maize" "Chromosome 10" "S10-137490546" 137490546 65.5947453 TRUE 2.04
"maize" "Chromosome 10" "S10-137688537" 137688537 66.7781521 TRUE 2.01
"maize" "Chromosome 10" "S10-138075525" 138075525 67.0725497 TRUE 1.94
"maize" "Chromosome 10" "S10-139150531" 139150531 67.6625328 TRUE 1.88
"maize" "Chromosome 10" "S10-139273966" 139273966 68.548782 TRUE 1.89
"maize" "Chromosome 10" "S10-140161508" 140161508 70.5312565 TRUE 1.94
"maize" "Chromosome 10" "S10-140503644" 140503644 71.5150041 TRUE 1.95
"maize" "Chromosome 10" "S10-141793071" 141793071 74.5026006 TRUE 2.06
"maize" "Chromosome 10" "S10-142142703" 142142703 74.796596 TRUE 2.12
"maize" "Chromosome 10" "S10-143143102" 143143102 76.5781657 TRUE 2.46
"maize" "Chromosome 10" "S10-143569034" 143569034 77.1672822 TRUE 2.68
"maize" "Chromosome 10" "S10-144043299" 144043299 77.461207 TRUE 2.97
"maize" "Chromosome 10" "S10-144954354" 144954354 82.2960664 TRUE 3.48
"maize" "Chromosome 10" "S10-145377265" 145377265 83.1819288 TRUE 3.66
"maize" "Chromosome 10" "S10-145554297" 145554297 83.4764117 TRUE 3.73
"maize" "Chromosome 10" "S10-145599914" 145599914 83.7705055 TRUE 3.75
"maize" "Chromosome 10" "S10-145907122" 145907122 87.6823388 TRUE 3.83
"maize" "Chromosome 10" "S10-146375174" 146375174 88.5684804 TRUE 3.91
"maize" "Chromosome 10" "S10-147255447" 147255447 89.1582189 TRUE 4.06
"maize" "Chromosome 10" "S10-147431825" 147431825 91.8460389 TRUE 4.1
"maize" "Chromosome 10" "S10-147542234" 147542234 92.1399561 TRUE 4.12
"maize" "Chromosome 10" "S10-148313626" 148313626 95.1840181 TRUE 4.19
"maize" "Chromosome 10" "S10-148421413" 148421413 96.8800984 TRUE 4.2
"maize" "Chromosome 2" "S2-   662241" 662241 0 TRUE 3.02
"maize" "Chromosome 2" "S2-  1720144" 1720144 1.176503 TRUE 3.03
"maize" "Chromosome 2" "S2-  1963367" 1963367 2.360714 TRUE 3.04
"maize" "Chromosome 2" "S2-  2083921" 2083921 2.655327 TRUE 3.04
"maize" "Chromosome 2" "S2-  2090374" 2090374 2.949803 TRUE 3.04
"maize" "Chromosome 2" "S2-  2131717" 2131717 4.133819 TRUE 3.04
"maize" "Chromosome 2" "S2-  3021231" 3021231 7.12657 TRUE 2.99
"maize" "Chromosome 2" "S2-  3342245" 3342245 7.420131 TRUE 2.95
"maize" "Chromosome 2" "S2-  4628913" 4628913 12.768482 TRUE 2.69
"maize" "Chromosome 2" "S2-  5074527" 5074527 14.172318 TRUE 2.56
"maize" "Chromosome 2" "S2-  5853855" 5853855 16.255766 TRUE 2.35
"maize" "Chromosome 2" "S2-  6597714" 6597714 16.845725 TRUE 2.17
"maize" "Chromosome 2" "S2-  7296105" 7296105 17.435762 TRUE 2.07
"maize" "Chromosome 2" "S2-  9117033" 9117033 18.918855 TRUE 2.12
"maize" "Chromosome 2" "S2-  9987104" 9987104 20.701905 TRUE 2.27
"maize" "Chromosome 2" "S2- 10391505" 10391505 21.588298 TRUE 2.35
"maize" "Chromosome 2" "S2- 11569590" 11569590 24.583585 TRUE 2.5
"maize" "Chromosome 2" "S2- 11769858" 11769858 28.405725 TRUE 2.51
"maize" "Chromosome 2" "S2- 13353742" 13353742 32.827438 TRUE 2.34
"maize" "Chromosome 2" "S2- 14233731" 14233731 34.30989 TRUE 2.09
"maize" "Chromosome 2" "S2- 14473652" 14473652 35.19643 TRUE 2.01
"maize" "Chromosome 2" "S2- 14556898" 14556898 35.490886 TRUE 1.98
"maize" "Chromosome 2" "S2- 15493349" 15493349 36.08097 TRUE 1.68
"maize" "Chromosome 2" "S2- 16246539" 16246539 36.670923 TRUE 1.49
"maize" "Chromosome 2" "S2- 17273677" 17273677 38.15349 TRUE 1.29
"maize" "Chromosome 2" "S2- 18301061" 18301061 38.743423 TRUE 1.18
"maize" "Chromosome 2" "S2- 18943349" 18943349 39.333393 TRUE 1.14
"maize" "Chromosome 2" "S2- 19326638" 19326638 40.517243 TRUE 1.13
"maize" "Chromosome 2" "S2- 19951824" 19951824 41.107093 TRUE 1.11
"maize" "Chromosome 2" "S2- 21043253" 21043253 41.993377 TRUE 1.08
"maize" "Chromosome 2" "S2- 21236591" 21236591 42.583244 TRUE 1.08
"maize" "Chromosome 2" "S2- 21549771" 21549771 43.469566 TRUE 1.07
"maize" "Chromosome 2" "S2- 22414175" 22414175 43.764023 TRUE 1.05
"maize" "Chromosome 2" "S2- 23505820" 23505820 44.058404 TRUE 1.01
"maize" "Chromosome 2" "S2- 23760194" 23760194 45.539951 TRUE 0.99
"maize" "Chromosome 2" "S2- 25435400" 25435400 48.22663 TRUE 0.85
"maize" "Chromosome 2" "S2- 29300388" 29300388 49.112919 TRUE 0.48
"maize" "Chromosome 2" "S2- 29889220" 29889220 50.596028 TRUE 0.43
"maize" "Chromosome 2" "S2- 34136274" 34136274 50.890483 TRUE 0.31
"maize" "Chromosome 2" "S2- 36946814" 36946814 51.77732 TRUE 0.48
"maize" "Chromosome 2" "S2- 38767770" 38767770 52.48554 TRUE 0.64
"maize" "Chromosome 2" "S2- 39923936" 39923936 53.551515 TRUE 0.72
"maize" "Chromosome 2" "S2- 40689667" 40689667 54.438261 TRUE 0.76
"maize" "Chromosome 2" "S2- 41932353" 41932353 56.52369 TRUE 0.75
"maize" "Chromosome 2" "S2- 46619659" 46619659 59.217319 TRUE 0.48
"maize" "Chromosome 2" "S2- 51804883" 51804883 59.80737 TRUE 0.19
"maize" "Chromosome 2" "S2- 55555970" 55555970 60.694548 TRUE 0.14
"maize" "Chromosome 2" "S2- 57686773" 57686773 60.989093 TRUE 0.15
"maize" "Chromosome 2" "S2- 59396678" 59396678 61.283675 TRUE 0.15
"maize" "Chromosome 2" "S2- 63621829" 63621829 61.874035 TRUE 0.13
"maize" "Chromosome 2" "S2- 68475574" 68475574 62.464182 TRUE 0.11
"maize" "Chromosome 2" "S2-109563535" 109563535 64.537239 TRUE 0.07
"maize" "Chromosome 2" "S2-147075670" 147075670 68.419407 TRUE 0.13
"maize" "Chromosome 2" "S2-152206039" 152206039 70.202555 TRUE 0.12
"maize" "Chromosome 2" "S2-154601993" 154601993 70.496895 TRUE 0.12
"maize" "Chromosome 2" "S2-165523452" 165523452 71.383806 TRUE 0.21
"maize" "Chromosome 2" "S2-169554433" 169554433 72.568408 TRUE 0.35
"maize" "Chromosome 2" "S2-173132961" 173132961 74.35209 TRUE 0.61
"maize" "Chromosome 2" "S2-174411110" 174411110 75.238845 TRUE 0.71
"maize" "Chromosome 2" "S2-175112712" 175112712 75.533195 TRUE 0.75
"maize" "Chromosome 2" "S2-177202230" 177202230 77.964556 TRUE 0.85
"maize" "Chromosome 2" "S2-182837965" 182837965 83.255928 TRUE 1.17
"maize" "Chromosome 2" "S2-183279623" 183279623 84.142131 TRUE 1.2
"maize" "Chromosome 2" "S2-184650892" 184650892 85.028949 TRUE 1.35
"maize" "Chromosome 2" "S2-185495698" 185495698 85.61907 TRUE 1.47
"maize" "Chromosome 2" "S2-186085569" 186085569 86.633013 TRUE 1.55
"maize" "Chromosome 2" "S2-186848247" 186848247 87.989003 TRUE 1.66
"maize" "Chromosome 2" "S2-187501921" 187501921 89.173799 TRUE 1.72
"maize" "Chromosome 2" "S2-188533094" 188533094 90.958039 TRUE 1.76
"maize" "Chromosome 2" "S2-189027040" 189027040 92.442256 TRUE 1.74
"maize" "Chromosome 2" "S2-189049235" 189049235 92.736665 TRUE 1.74
"maize" "Chromosome 2" "S2-189550307" 189550307 93.62366 TRUE 1.7
"maize" "Chromosome 2" "S2-190351636" 190351636 96.012734 TRUE 1.59
"maize" "Chromosome 2" "S2-192313443" 192313443 98.401732 TRUE 1.22
"maize" "Chromosome 2" "S2-194269840" 194269840 99.88587 TRUE 0.83
"maize" "Chromosome 2" "S2-195587949" 195587949 100.180311 TRUE 0.6
"maize" "Chromosome 2" "S2-196871847" 196871847 100.770607 TRUE 0.43
"maize" "Chromosome 2" "S2-199061433" 199061433 101.657653 TRUE 0.21
"maize" "Chromosome 2" "S2-202537206" 202537206 102.247886 TRUE 0.04
"maize" "Chromosome 2" "S2-209199731" 209199731 102.837067 TRUE 0.46
"maize" "Chromosome 2" "S2-210175052" 210175052 103.131645 TRUE 0.59
"maize" "Chromosome 2" "S2-210663162" 210663162 103.721706 TRUE 0.67
"maize" "Chromosome 2" "S2-213196830" 213196830 106.109633 TRUE 1
"maize" "Chromosome 2" "S2-213309182" 213309182 106.403985 TRUE 1.02
"maize" "Chromosome 2" "S2-213761927" 213761927 106.698567 TRUE 1.07
"maize" "Chromosome 2" "S2-214265742" 214265742 107.288859 TRUE 1.12
"maize" "Chromosome 2" "S2-215334787" 215334787 107.879076 TRUE 1.23
"maize" "Chromosome 2" "S2-215617005" 215617005 108.766026 TRUE 1.25
"maize" "Chromosome 2" "S2-216078274" 216078274 109.356084 TRUE 1.29
"maize" "Chromosome 2" "S2-217262768" 217262768 110.540381 TRUE 1.35
"maize" "Chromosome 2" "S2-217599459" 217599459 112.323507 TRUE 1.36
"maize" "Chromosome 2" "S2-218003996" 218003996 112.913584 TRUE 1.37
"maize" "Chromosome 2" "S2-218549451" 218549451 113.208145 TRUE 1.37
"maize" "Chromosome 2" "S2-219416989" 219416989 113.502739 TRUE 1.4
"maize" "Chromosome 2" "S2-219793508" 219793508 113.797025 TRUE 1.42
"maize" "Chromosome 2" "S2-221396454" 221396454 116.486271 TRUE 1.47
"maize" "Chromosome 2" "S2-222407282" 222407282 116.780203 TRUE 1.49
"maize" "Chromosome 2" "S2-223105525" 223105525 119.741608 TRUE 1.47
"maize" "Chromosome 2" "S2-224189816" 224189816 122.95093 TRUE 1.37
"maize" "Chromosome 2" "S2-224843568" 224843568 123.24508 TRUE 1.29
"maize" "Chromosome 2" "S2-226348072" 226348072 123.834711 TRUE 1.19
"maize" "Chromosome 2" "S2-230098583" 230098583 128.055228 TRUE 1.62
"maize" "Chromosome 2" "S2-230492261" 230492261 128.349209 TRUE 1.73
"maize" "Chromosome 2" "S2-231059115" 231059115 129.235723 TRUE 1.89
"maize" "Chromosome 2" "S2-232001637" 232001637 130.648082 TRUE 2.16
"maize" "Chromosome 2" "S2-232273993" 232273993 131.53637 TRUE 2.23
"maize" "Chromosome 2" "S2-233661877" 233661877 135.750762 TRUE 2.48
"maize" "Chromosome 2" "S2-234267867" 234267867 136.93369 TRUE 2.52
"maize" "Chromosome 2" "S2-234434627" 234434627 138.415408 TRUE 2.52
"maize" "Chromosome 2" "S2-234472394" 234472394 138.709795 TRUE 2.52
"maize" "Chromosome 2" "S2-234582119" 234582119 139.004332 TRUE 2.52
"maize" "Chromosome 2" "S2-234882019" 234882019 139.298729 TRUE 2.51
"maize" "Chromosome 2" "S2-234935843" 234935843 140.69617 TRUE 2.5
"maize" "Chromosome 2" "S2-235472782" 235472782 141.897337 TRUE 2.48
"maize" "Chromosome 2" "S2-237310078" 237310078 144.252863 TRUE 2.43
"maize" "Chromosome 3" "S3-  1467311" 1467311 0 TRUE 5.81
"maize" "Chromosome 3" "S3-  1482620" 1482620 0.8804993 TRUE 5.81
"maize" "Chromosome 3" "S3-  1554221" 1554221 1.1747588 TRUE 5.77
"maize" "Chromosome 3" "S3-  1975535" 1975535 3.2575663 TRUE 5.26
"maize" "Chromosome 3" "S3-  2064356" 2064356 3.5517215 TRUE 5.06
"maize" "Chromosome 3" "S3-  2158139" 2158139 5.3337869 TRUE 4.77
"maize" "Chromosome 3" "S3-  2813567" 2813567 7.4166725 TRUE 4.77
"maize" "Chromosome 3" "S3-  2950123" 2950123 7.710963 TRUE 5.39
"maize" "Chromosome 3" "S3-  3208699" 3208699 8.4756229 TRUE 7.34
"maize" "Chromosome 3" "S3-  3402663" 3402663 9.3143525 TRUE 8.83
"maize" "Chromosome 3" "S3-  3473329" 3473329 12.5259655 TRUE 9.19
"maize" "Chromosome 3" "S3-  3834382" 3834382 15.4884572 TRUE 8.57
"maize" "Chromosome 3" "S3-  3912989" 3912989 16.3750435 TRUE 7.95
"maize" "Chromosome 3" "S3-  3924584" 3924584 16.6695304 TRUE 7.86
"maize" "Chromosome 3" "S3-  4190355" 4190355 17.2591458 TRUE 6.04
"maize" "Chromosome 3" "S3-  5568069" 5568069 22.358652 TRUE 3.7
"maize" "Chromosome 3" "S3-  5826273" 5826273 23.801507 TRUE 4.06
"maize" "Chromosome 3" "S3-  5851927" 5851927 24.0958319 TRUE 4.06
"maize" "Chromosome 3" "S3-  5983653" 5983653 25.2802316 TRUE 3.95
"maize" "Chromosome 3" "S3-  6304704" 6304704 25.8703228 TRUE 3.59
"maize" "Chromosome 3" "S3-  6436983" 6436983 26.1648265 TRUE 3.54
"maize" "Chromosome 3" "S3-  6686389" 6686389 26.7976161 TRUE 3.51
"maize" "Chromosome 3" "S3-  7079598" 7079598 28.7602332 TRUE 3.07
"maize" "Chromosome 3" "S3-  7205634" 7205634 29.0545949 TRUE 2.75
"maize" "Chromosome 3" "S3-  7419382" 7419382 29.3490882 TRUE 2.2
"maize" "Chromosome 3" "S3-  7940594" 7940594 30.2355722 TRUE 1.36
"maize" "Chromosome 3" "S3-  8888487" 8888487 31.4192399 TRUE 1.42
"maize" "Chromosome 3" "S3- 10231616" 10231616 33.8034433 TRUE 2.15
"maize" "Chromosome 3" "S3- 10469729" 10469729 34.3932424 TRUE 2.13
"maize" "Chromosome 3" "S3- 10684503" 10684503 35.279363 TRUE 2.09
"maize" "Chromosome 3" "S3- 12996565" 12996565 39.359649 TRUE 1.62
"maize" "Chromosome 3" "S3- 14869538" 14869538 41.3727464 TRUE 0.99
"maize" "Chromosome 3" "S3- 15444610" 15444610 42.5574614 TRUE 0.76
"maize" "Chromosome 3" "S3- 17841884" 17841884 43.6686992 TRUE 0.32
"maize" "Chromosome 3" "S3- 20314506" 20314506 44.0357903 TRUE 0.33
"maize" "Chromosome 3" "S3- 32542054" 32542054 47.9589297 TRUE 0.24
"maize" "Chromosome 3" "S3- 35667328" 35667328 48.54883 TRUE 0.16
"maize" "Chromosome 3" "S3- 38638577" 38638577 48.8434123 TRUE 0.06
"maize" "Chromosome 3" "S3- 45202687" 45202687 49.1380267 TRUE 0.05
"maize" "Chromosome 3" "S3- 50647514" 50647514 49.4326412 TRUE 0.1
"maize" "Chromosome 3" "S3- 52244638" 52244638 49.7272235 TRUE 0.09
"maize" "Chromosome 3" "S3- 98821069" 98821069 50.6121369 TRUE 0.03
"maize" "Chromosome 3" "S3-113364102" 113364102 51.2023572 TRUE 0.07
"maize" "Chromosome 3" "S3-130073619" 130073619 52.9774388 TRUE 0.12
"maize" "Chromosome 3" "S3-132295278" 132295278 53.2719301 TRUE 0.13
"maize" "Chromosome 3" "S3-135880432" 135880432 53.566378 TRUE 0.17
"maize" "Chromosome 3" "S3-143726232" 143726232 55.0495616 TRUE 0.16
"maize" "Chromosome 3" "S3-144134276" 144134276 55.3439889 TRUE 0.16
"maize" "Chromosome 3" "S3-145856771" 145856771 55.6385621 TRUE 0.37
"maize" "Chromosome 3" "S3-147044928" 147044928 55.9330554 TRUE 0.51
"maize" "Chromosome 3" "S3-148102328" 148102328 56.8196518 TRUE 0.42
"maize" "Chromosome 3" "S3-149447368" 149447368 57.1141026 TRUE 0.27
"maize" "Chromosome 3" "S3-152213397" 152213397 57.704223 TRUE 0.22
"maize" "Chromosome 3" "S3-159022435" 159022435 60.3700482 TRUE 0.69
"maize" "Chromosome 3" "S3-159849699" 159849699 60.9600897 TRUE 0.76
"maize" "Chromosome 3" "S3-160347045" 160347045 61.2545027 TRUE 0.75
"maize" "Chromosome 3" "S3-162108185" 162108185 62.4385704 TRUE 0.25
"maize" "Chromosome 3" "S3-165505549" 165505549 63.6228093 TRUE 1.86
"maize" "Chromosome 3" "S3-166243228" 166243228 65.9402997 TRUE 3.12
"maize" "Chromosome 3" "S3-166734744" 166734744 67.5043885 TRUE 3.09
"maize" "Chromosome 3" "S3-166854420" 166854420 67.7986325 TRUE 2.78
"maize" "Chromosome 3" "S3-169075836" 169075836 69.5816353 TRUE 0.48
"maize" "Chromosome 3" "S3-169917418" 169917418 70.4682326 TRUE 0.85
"maize" "Chromosome 3" "S3-170499879" 170499879 70.7626234 TRUE 0.63
"maize" "Chromosome 3" "S3-172421242" 172421242 71.9468891 TRUE 0.92
"maize" "Chromosome 3" "S3-172850399" 172850399 72.2413496 TRUE 1.44
"maize" "Chromosome 3" "S3-173334767" 173334767 72.53566 TRUE 1.57
"maize" "Chromosome 3" "S3-174577402" 174577402 74.9219339 TRUE 0.78
"maize" "Chromosome 3" "S3-176595872" 176595872 75.5122189 TRUE 0.9
"maize" "Chromosome 3" "S3-176850521" 176850521 76.1023564 TRUE 1.09
"maize" "Chromosome 3" "S3-177496563" 177496563 77.2869386 TRUE 2.26
"maize" "Chromosome 3" "S3-178059696" 178059696 78.1735271 TRUE 2.67
"maize" "Chromosome 3" "S3-178578709" 178578709 80.2574278 TRUE 2.17
"maize" "Chromosome 3" "S3-181601512" 181601512 84.1764861 TRUE 1.46
"maize" "Chromosome 3" "S3-182102445" 182102445 85.0294118 TRUE 1.49
"maize" "Chromosome 3" "S3-182115599" 182115599 85.454312 TRUE 1.49
"maize" "Chromosome 3" "S3-183444715" 183444715 86.6394296 TRUE 0.79
"maize" "Chromosome 3" "S3-184413566" 184413566 87.5265796 TRUE 0.51
"maize" "Chromosome 3" "S3-185606910" 185606910 87.8209961 TRUE 1.43
"maize" "Chromosome 3" "S3-186032967" 186032967 89.2465824 TRUE 1.66
"maize" "Chromosome 3" "S3-186273962" 186273962 89.5991928 TRUE 1.48
"maize" "Chromosome 3" "S3-186843260" 186843260 89.893836 TRUE 1.26
"maize" "Chromosome 3" "S3-186888743" 186888743 90.1883736 TRUE 1.27
"maize" "Chromosome 3" "S3-187770972" 187770972 91.3737541 TRUE 0.98
"maize" "Chromosome 3" "S3-188396303" 188396303 91.6682763 TRUE 0.45
"maize" "Chromosome 3" "S3-190373979" 190373979 91.9627214 TRUE 0.21
"maize" "Chromosome 3" "S3-193478211" 193478211 93.7479801 TRUE 0.66
"maize" "Chromosome 3" "S3-193721769" 193721769 94.0424459 TRUE 0.63
"maize" "Chromosome 3" "S3-194534564" 194534564 94.3370643 TRUE 0.56
"maize" "Chromosome 3" "S3-195324919" 195324919 94.9274525 TRUE 0.53
"maize" "Chromosome 3" "S3-197487426" 197487426 96.1325156 TRUE 0.76
"maize" "Chromosome 3" "S3-199342061" 199342061 97.8448742 TRUE 0.92
"maize" "Chromosome 3" "S3-199633768" 199633768 98.1391542 TRUE 0.91
"maize" "Chromosome 3" "S3-202005756" 202005756 99.924499 TRUE 0.87
"maize" "Chromosome 3" "S3-202839206" 202839206 101.1078867 TRUE 0.87
"maize" "Chromosome 3" "S3-217178152" 217178152 118.0032685 TRUE 1.86
"maize" "Chromosome 3" "S3-219265104" 219265104 121.9185985 TRUE 1.51
"maize" "Chromosome 3" "S3-220111990" 220111990 122.806022 TRUE 1.27
"maize" "Chromosome 3" "S3-221772797" 221772797 125.196781 TRUE 1.81
"maize" "Chromosome 3" "S3-222007296" 222007296 125.7868126 TRUE 1.88
"maize" "Chromosome 3" "S3-222681709" 222681709 126.9718125 TRUE 1.06
"maize" "Chromosome 3" "S3-223624298" 223624298 127.2657962 TRUE 0.5
"maize" "Chromosome 3" "S3-226661207" 226661207 131.4945651 TRUE 1.68
"maize" "Chromosome 3" "S3-227484529" 227484529 133.2770707 TRUE 1.17
"maize" "Chromosome 3" "S3-228462568" 228462568 134.1634668 TRUE 0.69
"maize" "Chromosome 3" "S3-229337626" 229337626 134.1634669 TRUE 0.85
"maize" "Chromosome 3" "S3-230343495" 230343495 135.6460403 TRUE 1.35
"maize" "Chromosome 3" "S3-231911983" 231911983 138.3545811 TRUE 2.13
"maize" "Chromosome 4" "S4-    31444" 31444 0 TRUE 1.97
"maize" "Chromosome 4" "S4-  1048150" 1048150 0.5805315 TRUE 2.21
"maize" "Chromosome 4" "S4-  1944715" 1944715 2.6626458 TRUE 2.78
"maize" "Chromosome 4" "S4-  2439560" 2439560 3.8465236 TRUE 3.19
"maize" "Chromosome 4" "S4-  2892482" 2892482 4.7327154 TRUE 3.58
"maize" "Chromosome 4" "S4-  3270901" 3270901 8.0300188 TRUE 3.85
"maize" "Chromosome 4" "S4-  3478848" 3478848 8.3240193 TRUE 3.97
"maize" "Chromosome 4" "S4-  4060463" 4060463 10.1065447 TRUE 4.19
"maize" "Chromosome 4" "S4-  5011219" 5011219 14.6479199 TRUE 4.14
"maize" "Chromosome 4" "S4-  5044461" 5044461 14.9417941 TRUE 4.13
"maize" "Chromosome 4" "S4-  5383947" 5383947 16.725871 TRUE 3.96
"maize" "Chromosome 4" "S4-  6067602" 6067602 20.028604 TRUE 3.43
"maize" "Chromosome 4" "S4-  6630716" 6630716 21.5111833 TRUE 2.94
"maize" "Chromosome 4" "S4-  9636741" 9636741 24.8114188 TRUE 1.93
"maize" "Chromosome 4" "S4- 10238623" 10238623 29.3509893 TRUE 2.06
"maize" "Chromosome 4" "S4- 11224973" 11224973 30.8327763 TRUE 2.13
"maize" "Chromosome 4" "S4- 15605867" 15605867 37.5782067 TRUE 1.53
"maize" "Chromosome 4" "S4- 15634773" 15634773 38.7612095 TRUE 1.53
"maize" "Chromosome 4" "S4- 15883035" 15883035 39.3510351 TRUE 1.49
"maize" "Chromosome 4" "S4- 17851847" 17851847 41.13289 TRUE 1
"maize" "Chromosome 4" "S4- 17877796" 17877796 41.4272262 TRUE 1
"maize" "Chromosome 4" "S4- 18004534" 18004534 42.0171364 TRUE 0.96
"maize" "Chromosome 4" "S4- 21936413" 21936413 43.7988122 TRUE 0.49
"maize" "Chromosome 4" "S4- 23002608" 23002608 43.945804 TRUE 0.61
"maize" "Chromosome 4" "S4- 23215745" 23215745 44.0927667 TRUE 0.64
"maize" "Chromosome 4" "S4- 23933341" 23933341 45.5746156 TRUE 0.64
"maize" "Chromosome 4" "S4- 24641451" 24641451 45.8689595 TRUE 0.55
"maize" "Chromosome 4" "S4- 27483521" 27483521 46.4589384 TRUE 0.25
"maize" "Chromosome 4" "S4- 29874716" 29874716 47.0489382 TRUE 0.2
"maize" "Chromosome 4" "S4- 31281480" 31281480 47.3434112 TRUE 0.21
"maize" "Chromosome 4" "S4- 34112332" 34112332 47.9333943 TRUE 0.27
"maize" "Chromosome 4" "S4- 37382249" 37382249 48.8198585 TRUE 0.24
"maize" "Chromosome 4" "S4- 38054940" 38054940 49.1143415 TRUE 0.19
"maize" "Chromosome 4" "S4- 39129385" 39129385 49.4088992 TRUE 0.14
"maize" "Chromosome 4" "S4- 57616987" 57616987 49.9980044 TRUE 0.03
"maize" "Chromosome 4" "S4- 65771599" 65771599 50.8825776 TRUE 0.11
"maize" "Chromosome 4" "S4- 71241668" 71241668 51.1770878 TRUE 0.1
"maize" "Chromosome 4" "S4- 72904206" 72904206 51.4716353 TRUE 0.08
"maize" "Chromosome 4" "S4- 76411582" 76411582 51.7661827 TRUE 0.07
"maize" "Chromosome 4" "S4-124956554" 124956554 53.5384942 TRUE 0.09
"maize" "Chromosome 4" "S4-130206806" 130206806 54.1283561 TRUE 0.26
"maize" "Chromosome 4" "S4-131728472" 131728472 54.4227938 TRUE 0.26
"maize" "Chromosome 4" "S4-131792786" 131792786 55.2107768 TRUE 0.26
"maize" "Chromosome 4" "S4-136128483" 136128483 55.6031213 TRUE 0.18
"maize" "Chromosome 4" "S4-142278483" 142278483 56.7836747 TRUE 0.37
"maize" "Chromosome 4" "S4-143831111" 143831111 58.2641286 TRUE 0.44
"maize" "Chromosome 4" "S4-153547732" 153547732 66.2763545 TRUE 1.61
"maize" "Chromosome 4" "S4-155036432" 155036432 69.2638613 TRUE 1.75
"maize" "Chromosome 4" "S4-156509280" 156509280 72.2528893 TRUE 1.63
"maize" "Chromosome 4" "S4-157123964" 157123964 72.8423064 TRUE 1.5
"maize" "Chromosome 4" "S4-160305183" 160305183 76.4430872 TRUE 0.98
"maize" "Chromosome 4" "S4-163293053" 163293053 79.1053915 TRUE 0.68
"maize" "Chromosome 4" "S4-166940634" 166940634 80.8761175 TRUE 0.31
"maize" "Chromosome 4" "S4-180463709" 180463709 82.3540067 TRUE 0.24
"maize" "Chromosome 4" "S4-185559052" 185559052 84.5466472 TRUE 1.06
"maize" "Chromosome 4" "S4-185892221" 185892221 85.7299847 TRUE 1.14
"maize" "Chromosome 4" "S4-186664030" 186664030 86.3198258 TRUE 1.23
"maize" "Chromosome 4" "S4-187025403" 187025403 86.614208 TRUE 1.23
"maize" "Chromosome 4" "S4-187258136" 187258136 87.7976672 TRUE 1.2
"maize" "Chromosome 4" "S4-187881370" 187881370 88.3870605 TRUE 1.08
"maize" "Chromosome 4" "S4-195383402" 195383402 91.9803927 TRUE 0.23
"maize" "Chromosome 4" "S4-225962912" 225962912 94.0430964 TRUE 0.1
"maize" "Chromosome 4" "S4-230885383" 230885383 95.5206612 TRUE 1.14
"maize" "Chromosome 4" "S4-230903919" 230903919 96.4061882 TRUE 1.15
"maize" "Chromosome 4" "S4-233562716" 233562716 101.1440813 TRUE 2.07
"maize" "Chromosome 4" "S4-234339736" 234339736 101.9631781 TRUE 2.36
"maize" "Chromosome 4" "S4-234360879" 234360879 102.2566488 TRUE 2.37
"maize" "Chromosome 4" "S4-236940105" 236940105 109.9507702 TRUE 4.02
"maize" "Chromosome 4" "S4-237812894" 237812894 112.0318182 TRUE 4.74
"maize" "Chromosome 4" "S4-237853297" 237853297 113.0685649 TRUE 4.78
"maize" "Chromosome 4" "S4-238320233" 238320233 118.6307787 TRUE 5.02
"maize" "Chromosome 4" "S4-238860963" 238860963 121.0118053 TRUE 5.07
"maize" "Chromosome 4" "S4-239303590" 239303590 121.3060688 TRUE 5.08
"maize" "Chromosome 4" "S4-239688207" 239688207 122.7874257 TRUE 5.12
"maize" "Chromosome 4" "S4-239753588" 239753588 124.7786057 TRUE 5.12
"maize" "Chromosome 4" "S4-240251616" 240251616 125.0736906 TRUE 5.2
"maize" "Chromosome 4" "S4-240483168" 240483168 127.7583907 TRUE 5.23
"maize" "Chromosome 4" "S4-240875769" 240875769 130.4333521 TRUE 5.25
"maize" "Chromosome 5" "S5-   804132" 804132 0 TRUE 6.98
"maize" "Chromosome 5" "S5-  1844338" 1844338 7.070012 TRUE 6.77
"maize" "Chromosome 5" "S5-  2140757" 2140757 8.849619 TRUE 6.41
"maize" "Chromosome 5" "S5-  2604948" 2604948 12.762328 TRUE 4.73
"maize" "Chromosome 5" "S5-  3057564" 3057564 13.351983 TRUE 3.2
"maize" "Chromosome 5" "S5-  3393538" 3393538 13.941862 TRUE 3.05
"maize" "Chromosome 5" "S5-  3761100" 3761100 16.327221 TRUE 3.4
"maize" "Chromosome 5" "S5-  4197390" 4197390 16.916947 TRUE 3.94
"maize" "Chromosome 5" "S5-  4585060" 4585060 18.699325 TRUE 4.32
"maize" "Chromosome 5" "S5-  4922846" 4922846 21.08462 TRUE 4.51
"maize" "Chromosome 5" "S5-  5495548" 5495548 22.564983 TRUE 4.77
"maize" "Chromosome 5" "S5-  6685547" 6685547 29.001226 TRUE 4.24
"maize" "Chromosome 5" "S5-  7696915" 7696915 31.992635 TRUE 2.17
"maize" "Chromosome 5" "S5-  8558442" 8558442 33.176212 TRUE 0.7
"maize" "Chromosome 5" "S5-  9386475" 9386475 33.470534 TRUE 0.98
"maize" "Chromosome 5" "S5- 10022225" 10022225 34.65425 TRUE 1.41
"maize" "Chromosome 5" "S5- 10507558" 10507558 35.2441 TRUE 1.14
"maize" "Chromosome 5" "S5- 11702998" 11702998 36.130007 TRUE 1.01
"maize" "Chromosome 5" "S5- 14153040" 14153040 40.349287 TRUE 1.83
"maize" "Chromosome 5" "S5- 14530679" 14530679 40.643318 TRUE 1.72
"maize" "Chromosome 5" "S5- 14695153" 14695153 41.233459 TRUE 1.64
"maize" "Chromosome 5" "S5- 14858862" 14858862 41.527839 TRUE 1.52
"maize" "Chromosome 5" "S5- 16319829" 16319829 43.010345 TRUE 0.71
"maize" "Chromosome 5" "S5- 16951230" 16951230 43.304672 TRUE 0.67
"maize" "Chromosome 5" "S5- 18178019" 18178019 44.191014 TRUE 0.69
"maize" "Chromosome 5" "S5- 20219298" 20219298 45.374692 TRUE 0.37
"maize" "Chromosome 5" "S5- 20855693" 20855693 45.669052 TRUE 0.44
"maize" "Chromosome 5" "S5- 22375655" 22375655 46.555325 TRUE 0.95
"maize" "Chromosome 5" "S5- 24175107" 24175107 48.637636 TRUE 0.86
"maize" "Chromosome 5" "S5- 27968912" 27968912 50.120149 TRUE 0.18
"maize" "Chromosome 5" "S5- 31406025" 31406025 50.71016 TRUE 0.16
"maize" "Chromosome 5" "S5- 32940199" 32940199 51.004696 TRUE 0.22
"maize" "Chromosome 5" "S5- 34746539" 34746539 51.299194 TRUE 0.17
"maize" "Chromosome 5" "S5- 45937433" 45937433 52.185896 TRUE 0.32
"maize" "Chromosome 5" "S5- 46555803" 46555803 52.776004 TRUE 0.37
"maize" "Chromosome 5" "S5- 48179742" 48179742 53.07045 TRUE 0.41
"maize" "Chromosome 5" "S5- 50510205" 50510205 54.157088 TRUE 0.36
"maize" "Chromosome 5" "S5- 53270385" 53270385 54.987891 TRUE 0.23
"maize" "Chromosome 5" "S5- 56768986" 56768986 55.282434 TRUE 0.11
"maize" "Chromosome 5" "S5- 57536540" 57536540 55.577049 TRUE 0.11
"maize" "Chromosome 5" "S5- 58780431" 58780431 55.871588 TRUE 0.15
"maize" "Chromosome 5" "S5- 62784657" 62784657 56.758589 TRUE 0.72
"maize" "Chromosome 5" "S5- 63189389" 63189389 57.943455 TRUE 0.71
"maize" "Chromosome 5" "S5- 65448854" 65448854 58.533652 TRUE 0.26
"maize" "Chromosome 5" "S5- 69483992" 69483992 59.123869 TRUE 0.24
"maize" "Chromosome 5" "S5- 71408094" 71408094 60.010829 TRUE 0.39
"maize" "Chromosome 5" "S5- 74366526" 74366526 60.897779 TRUE 0.27
"maize" "Chromosome 5" "S5- 76146885" 76146885 61.192313 TRUE 0.12
"maize" "Chromosome 5" "S5- 77733795" 77733795 61.486928 TRUE 0.08
"maize" "Chromosome 5" "S5- 82480380" 82480380 61.781542 TRUE 0.14
"maize" "Chromosome 5" "S5- 83007915" 83007915 62.076157 TRUE 0.15
"maize" "Chromosome 5" "S5- 85586858" 85586858 62.370739 TRUE 0.17
"maize" "Chromosome 5" "S5-132694729" 132694729 64.43734 TRUE 0.08
"maize" "Chromosome 5" "S5-137192831" 137192831 64.731954 TRUE 0.12
"maize" "Chromosome 5" "S5-140121775" 140121775 65.026588 TRUE 0.05
"maize" "Chromosome 5" "S5-140133124" 140133124 65.123364 TRUE 0.05
"maize" "Chromosome 5" "S5-142442179" 142442179 65.327204 TRUE 0
"maize" "Chromosome 5" "S5-146473200" 146473200 65.621816 TRUE 0.36
"maize" "Chromosome 5" "S5-147516390" 147516390 65.916378 TRUE 0.32
"maize" "Chromosome 5" "S5-151356569" 151356569 66.506665 TRUE 0.07
"maize" "Chromosome 5" "S5-151925999" 151925999 66.801237 TRUE 0.14
"maize" "Chromosome 5" "S5-155137685" 155137685 67.095464 TRUE 0.5
"maize" "Chromosome 5" "S5-159369311" 159369311 70.356907 TRUE 0.64
"maize" "Chromosome 5" "S5-166619254" 166619254 74.803481 TRUE 0.78
"maize" "Chromosome 5" "S5-167317323" 167317323 75.690035 TRUE 0.82
"maize" "Chromosome 5" "S5-170238684" 170238684 78.079226 TRUE 1.23
"maize" "Chromosome 5" "S5-170866700" 170866700 79.56273 TRUE 1.38
"maize" "Chromosome 5" "S5-174665895" 174665895 84.741906 TRUE 1.14
"maize" "Chromosome 5" "S5-176657175" 176657175 86.525702 TRUE 0.67
"maize" "Chromosome 5" "S5-177887513" 177887513 87.115862 TRUE 0.66
"maize" "Chromosome 5" "S5-177889758" 177889758 87.410402 TRUE 0.66
"maize" "Chromosome 5" "S5-179069916" 179069916 88.000711 TRUE 0.6
"maize" "Chromosome 5" "S5-179194357" 179194357 88.295283 TRUE 0.59
"maize" "Chromosome 5" "S5-179978930" 179978930 88.589736 TRUE 1.16
"maize" "Chromosome 5" "S5-180912331" 180912331 90.073116 TRUE 1.63
"maize" "Chromosome 5" "S5-181257652" 181257652 90.959762 TRUE 1.37
"maize" "Chromosome 5" "S5-182188797" 182188797 91.549849 TRUE 0.86
"maize" "Chromosome 5" "S5-182297633" 182297633 91.844316 TRUE 0.85
"maize" "Chromosome 5" "S5-183928221" 183928221 92.69745 TRUE 0.32
"maize" "Chromosome 5" "S5-184282206" 184282206 93.122086 TRUE 0.18
"maize" "Chromosome 5" "S5-186725329" 186725329 94.905034 TRUE 2.93
"maize" "Chromosome 5" "S5-186882368" 186882368 96.0891 TRUE 3.24
"maize" "Chromosome 5" "S5-187621921" 187621921 98.474232 TRUE 2.74
"maize" "Chromosome 5" "S5-189254765" 189254765 100.859282 TRUE 1.02
"maize" "Chromosome 5" "S5-190283638" 190283638 101.448772 TRUE 1.56
"maize" "Chromosome 5" "S5-192204044" 192204044 104.744327 TRUE 1.12
"maize" "Chromosome 5" "S5-192310401" 192310401 105.136749 TRUE 1.05
"maize" "Chromosome 5" "S5-194306005" 194306005 105.924806 TRUE 0.19
"maize" "Chromosome 5" "S5-197831076" 197831076 106.219211 TRUE 0.19
"maize" "Chromosome 5" "S5-199421234" 199421234 107.105713 TRUE 0.59
"maize" "Chromosome 5" "S5-200162207" 200162207 107.400201 TRUE 1.24
"maize" "Chromosome 5" "S5-200491216" 200491216 107.694732 TRUE 1.8
"maize" "Chromosome 5" "S5-200707276" 200707276 108.284852 TRUE 2.15
"maize" "Chromosome 5" "S5-200827084" 200827084 108.579298 TRUE 2.21
"maize" "Chromosome 5" "S5-200994678" 200994678 109.465894 TRUE 1.98
"maize" "Chromosome 5" "S5-201295085" 201295085 109.760387 TRUE 1.31
"maize" "Chromosome 5" "S5-201998295" 201998295 110.054955 TRUE 0.45
"maize" "Chromosome 5" "S5-203092510" 203092510 110.349523 TRUE 0.28
"maize" "Chromosome 5" "S5-203677858" 203677858 110.643978 TRUE 0.52
"maize" "Chromosome 5" "S5-204660846" 204660846 111.838074 TRUE 1.44
"maize" "Chromosome 5" "S5-205204337" 205204337 112.260121 TRUE 2.24
"maize" "Chromosome 5" "S5-205431635" 205431635 112.554455 TRUE 2.73
"maize" "Chromosome 5" "S5-205783945" 205783945 114.638352 TRUE 3.05
"maize" "Chromosome 5" "S5-205897724" 205897724 114.932643 TRUE 2.89
"maize" "Chromosome 5" "S5-206795202" 206795202 115.819535 TRUE 3.06
"maize" "Chromosome 5" "S5-206901722" 206901722 116.40954 TRUE 3.33
"maize" "Chromosome 5" "S5-206942118" 206942118 118.493946 TRUE 3.43
"maize" "Chromosome 5" "S5-207179690" 207179690 118.78815 TRUE 3.37
"maize" "Chromosome 5" "S5-208220511" 208220511 120.271123 TRUE 1.38
"maize" "Chromosome 5" "S5-208416414" 208416414 121.157684 TRUE 1.15
"maize" "Chromosome 5" "S5-209791716" 209791716 122.044207 TRUE 1.41
"maize" "Chromosome 5" "S5-210682087" 210682087 123.826419 TRUE 2.28
"maize" "Chromosome 5" "S5-210725782" 210725782 124.120406 TRUE 2.31
"maize" "Chromosome 5" "S5-212048418" 212048418 127.414218 TRUE 2.6
"maize" "Chromosome 5" "S5-212254189" 212254189 127.89042 TRUE 2.57
"maize" "Chromosome 5" "S5-213610127" 213610127 131.645624 TRUE 3.72
"maize" "Chromosome 5" "S5-213647309" 213647309 132.235031 TRUE 3.79
"maize" "Chromosome 5" "S5-213964487" 213964487 132.824377 TRUE 4.4
"maize" "Chromosome 5" "S5-214547883" 214547883 136.7181 TRUE 5.1
"maize" "Chromosome 5" "S5-214811415" 214811415 137.012028 TRUE 5.15
"maize" "Chromosome 5" "S5-214998431" 214998431 137.897743 TRUE 5.12
"maize" "Chromosome 5" "S5-215112684" 215112684 138.783441 TRUE 5.09
"maize" "Chromosome 5" "S5-215126089" 215126089 139.966277 TRUE 5.09
"maize" "Chromosome 5" "S5-215520644" 215520644 140.852239 TRUE 5.09
"maize" "Chromosome 5" "S5-215569056" 215569056 141.146596 TRUE 5.1
"maize" "Chromosome 5" "S5-215675419" 215675419 142.024418 TRUE 5.12
"maize" "Chromosome 6" "S6-  2723772" 2723772 0 TRUE 3.01
"maize" "Chromosome 6" "S6-  3043194" 3043194 1.868147 TRUE 2.74
"maize" "Chromosome 6" "S6-  3046318" 3046318 2.309091 TRUE 2.74
"maize" "Chromosome 6" "S6-  3574374" 3574374 2.750009 TRUE 2.02
"maize" "Chromosome 6" "S6-  5162612" 5162612 5.1252 TRUE 0.9
"maize" "Chromosome 6" "S6-  5644820" 5644820 5.4197 TRUE 0.74
"maize" "Chromosome 6" "S6-  6549502" 6549502 6.009527 TRUE 0.58
"maize" "Chromosome 6" "S6- 28769176" 28769176 10.743425 TRUE 0.21
"maize" "Chromosome 6" "S6- 29285220" 29285220 10.743426 TRUE 0.22
"maize" "Chromosome 6" "S6- 34455137" 34455137 11.927021 TRUE 0.26
"maize" "Chromosome 6" "S6- 38086699" 38086699 13.14901 TRUE 0.19
"maize" "Chromosome 6" "S6- 53043719" 53043719 14.707035 TRUE 0.08
"maize" "Chromosome 6" "S6- 62608705" 62608705 15.297085 TRUE 0.1
"maize" "Chromosome 6" "S6- 66085147" 66085147 16.183739 TRUE 0.11
"maize" "Chromosome 6" "S6- 73021838" 73021838 16.478227 TRUE 0.05
"maize" "Chromosome 6" "S6- 77165599" 77165599 16.772753 TRUE 0.11
"maize" "Chromosome 6" "S6- 80146590" 80146590 17.362663 TRUE 0.34
"maize" "Chromosome 6" "S6- 83127969" 83127969 19.144123 TRUE 0.63
"maize" "Chromosome 6" "S6- 84547737" 84547737 19.438402 TRUE 0.62
"maize" "Chromosome 6" "S6- 85751820" 85751820 20.324808 TRUE 0.4
"maize" "Chromosome 6" "S6- 89147006" 89147006 21.803102 TRUE 0.52
"maize" "Chromosome 6" "S6- 92466109" 92466109 25.07536 TRUE 2.58
"maize" "Chromosome 6" "S6- 92978235" 92978235 27.417959 TRUE 2.62
"maize" "Chromosome 6" "S6- 93749668" 93749668 29.983061 TRUE 2.07
"maize" "Chromosome 6" "S6- 96097450" 96097450 32.003657 TRUE 0.91
"maize" "Chromosome 6" "S6- 96836023" 96836023 33.565967 TRUE 0.74
"maize" "Chromosome 6" "S6- 98079926" 98079926 33.860364 TRUE 0.72
"maize" "Chromosome 6" "S6-105033483" 105033483 39.935653 TRUE 0.63
"maize" "Chromosome 6" "S6-105920921" 105920921 40.22948 TRUE 0.77
"maize" "Chromosome 6" "S6-106010582" 106010582 40.523809 TRUE 0.81
"maize" "Chromosome 6" "S6-107907550" 107907550 42.606542 TRUE 1.33
"maize" "Chromosome 6" "S6-108492240" 108492240 43.492062 TRUE 1.34
"maize" "Chromosome 6" "S6-114921804" 114921804 51.563802 TRUE 1.05
"maize" "Chromosome 6" "S6-116138508" 116138508 52.747142 TRUE 0.92
"maize" "Chromosome 6" "S6-118935461" 118935461 54.831164 TRUE 0.52
"maize" "Chromosome 6" "S6-120318895" 120318895 55.421202 TRUE 0.54
"maize" "Chromosome 6" "S6-120921970" 120921970 55.715737 TRUE 0.61
"maize" "Chromosome 6" "S6-121493927" 121493927 56.306029 TRUE 0.6
"maize" "Chromosome 6" "S6-122913530" 122913530 56.896288 TRUE 0.56
"maize" "Chromosome 6" "S6-124479549" 124479549 57.783418 TRUE 0.73
"maize" "Chromosome 6" "S6-124481932" 124481932 58.07792 TRUE 0.73
"maize" "Chromosome 6" "S6-126064455" 126064455 58.668207 TRUE 0.16
"maize" "Chromosome 6" "S6-128764693" 128764693 59.25723 TRUE 0.87
"maize" "Chromosome 6" "S6-130150758" 130150758 60.740633 TRUE 0.93
"maize" "Chromosome 6" "S6-130189447" 130189447 61.330681 TRUE 0.91
"maize" "Chromosome 6" "S6-132009788" 132009788 61.920874 TRUE 0.82
"maize" "Chromosome 6" "S6-132176058" 132176058 62.511107 TRUE 0.88
"maize" "Chromosome 6" "S6-132820943" 132820943 63.101113 TRUE 0.81
"maize" "Chromosome 6" "S6-138676710" 138676710 65.792491 TRUE 1.19
"maize" "Chromosome 6" "S6-139784962" 139784962 67.275508 TRUE 1.55
"maize" "Chromosome 6" "S6-141330791" 141330791 69.662597 TRUE 1.03
"maize" "Chromosome 6" "S6-141704353" 141704353 69.956933 TRUE 0.78
"maize" "Chromosome 6" "S6-142692756" 142692756 70.251532 TRUE 0.33
"maize" "Chromosome 6" "S6-142958168" 142958168 70.546126 TRUE 0.28
"maize" "Chromosome 6" "S6-145269495" 145269495 70.840678 TRUE 0.39
"maize" "Chromosome 6" "S6-145507418" 145507418 71.43086 TRUE 0.44
"maize" "Chromosome 6" "S6-146691254" 146691254 71.725364 TRUE 0.54
"maize" "Chromosome 6" "S6-147522902" 147522902 72.315547 TRUE 0.39
"maize" "Chromosome 6" "S6-150563180" 150563180 72.610051 TRUE 0.26
"maize" "Chromosome 6" "S6-151080602" 151080602 73.200213 TRUE 0.34
"maize" "Chromosome 6" "S6-152501746" 152501746 73.494712 TRUE 0.31
"maize" "Chromosome 6" "S6-153977298" 153977298 74.084823 TRUE 0.78
"maize" "Chromosome 6" "S6-154507513" 154507513 74.379388 TRUE 1.06
"maize" "Chromosome 6" "S6-154977892" 154977892 74.969496 TRUE 1.05
"maize" "Chromosome 6" "S6-155170878" 155170878 75.856245 TRUE 1
"maize" "Chromosome 6" "S6-155951410" 155951410 76.150754 TRUE 0.89
"maize" "Chromosome 6" "S6-156638058" 156638058 76.4453 TRUE 1.45
"maize" "Chromosome 6" "S6-156942900" 156942900 77.035255 TRUE 1.87
"maize" "Chromosome 6" "S6-157610554" 157610554 79.11857 TRUE 2.04
"maize" "Chromosome 6" "S6-157859727" 157859727 79.412877 TRUE 1.98
"maize" "Chromosome 6" "S6-158477101" 158477101 80.003018 TRUE 2.33
"maize" "Chromosome 6" "S6-158493055" 158493055 80.297554 TRUE 2.35
"maize" "Chromosome 6" "S6-158566252" 158566252 80.592015 TRUE 2.45
"maize" "Chromosome 6" "S6-158856177" 158856177 81.776243 TRUE 2.69
"maize" "Chromosome 6" "S6-159211118" 159211118 82.366277 TRUE 2.88
"maize" "Chromosome 6" "S6-159633520" 159633520 82.956385 TRUE 3.01
"maize" "Chromosome 6" "S6-159660328" 159660328 83.546303 TRUE 3.01
"maize" "Chromosome 6" "S6-160023941" 160023941 85.630399 TRUE 2.73
"maize" "Chromosome 6" "S6-160433068" 160433068 86.220458 TRUE 1.84
"maize" "Chromosome 6" "S6-160742153" 160742153 86.51503 TRUE 1.2
"maize" "Chromosome 6" "S6-161422773" 161422773 86.809639 TRUE 1.46
"maize" "Chromosome 6" "S6-161920608" 161920608 87.104164 TRUE 3.07
"maize" "Chromosome 6" "S6-162031444" 162031444 88.063432 TRUE 3.53
"maize" "Chromosome 6" "S6-162641988" 162641988 90.985177 TRUE 4.84
"maize" "Chromosome 6" "S6-162797235" 162797235 91.871775 TRUE 4.83
"maize" "Chromosome 6" "S6-162870377" 162870377 92.166065 TRUE 4.77
"maize" "Chromosome 6" "S6-163116980" 163116980 94.250509 TRUE 4.32
"maize" "Chromosome 6" "S6-163286614" 163286614 94.544847 TRUE 3.89
"maize" "Chromosome 6" "S6-163617842" 163617842 95.135021 TRUE 3.31
"maize" "Chromosome 6" "S6-164030699" 164030699 96.319699 TRUE 3.26
"maize" "Chromosome 6" "S6-164463421" 164463421 97.803422 TRUE 3.81
"maize" "Chromosome 6" "S6-164513368" 164513368 98.097825 TRUE 3.9
"maize" "Chromosome 6" "S6-165048450" 165048450 100.182861 TRUE 4.89
"maize" "Chromosome 6" "S6-165442280" 165442280 102.26704 TRUE 5.36
"maize" "Chromosome 6" "S6-165446905" 165446905 102.857041 TRUE 5.36
"maize" "Chromosome 6" "S6-165741383" 165741383 103.446983 TRUE 5.3
"maize" "Chromosome 6" "S6-165835544" 165835544 106.13894 TRUE 5.18
"maize" "Chromosome 6" "S6-166278772" 166278772 106.728756 TRUE 4.51
"maize" "Chromosome 6" "S6-166832956" 166832956 109.116934 TRUE 3.64
"maize" "Chromosome 6" "S6-167092513" 167092513 110.301304 TRUE 3.2
"maize" "Chromosome 6" "S6-168050140" 168050140 112.386692 TRUE 2.24
"maize" "Chromosome 6" "S6-168301268" 168301268 112.964375 TRUE 2.23
"maize" "Chromosome 7" "S7-   986205" 986205 0 TRUE 11.37
"maize" "Chromosome 7" "S7-  1060162" 1060162 2.680063 TRUE 11.13
"maize" "Chromosome 7" "S7-  1139406" 1139406 3.269826 TRUE 10.47
"maize" "Chromosome 7" "S7-  1320647" 1320647 5.655644 TRUE 8.11
"maize" "Chromosome 7" "S7-  2144220" 2144220 7.738148 TRUE 3.58
"maize" "Chromosome 7" "S7-  2154849" 2154849 8.327693 TRUE 3.64
"maize" "Chromosome 7" "S7-  2784975" 2784975 11.319916 TRUE 4.88
"maize" "Chromosome 7" "S7-  2894247" 2894247 11.909134 TRUE 4.71
"maize" "Chromosome 7" "S7-  4084332" 4084332 17.075278 TRUE 4.46
"maize" "Chromosome 7" "S7-  4686835" 4686835 19.461664 TRUE 5.71
"maize" "Chromosome 7" "S7-  4906130" 4906130 21.467715 TRUE 6.45
"maize" "Chromosome 7" "S7-  5802266" 5802266 27.452502 TRUE 5.27
"maize" "Chromosome 7" "S7-  6308128" 6308128 29.235007 TRUE 3.04
"maize" "Chromosome 7" "S7-  6582222" 6582222 29.825047 TRUE 2.66
"maize" "Chromosome 7" "S7-  6747953" 6747953 30.415066 TRUE 2.58
"maize" "Chromosome 7" "S7-  7507207" 7507207 32.198267 TRUE 1.53
"maize" "Chromosome 7" "S7-  8935706" 8935706 32.788269 TRUE 0.48
"maize" "Chromosome 7" "S7-  9710741" 9710741 33.674924 TRUE 0.87
"maize" "Chromosome 7" "S7- 11576049" 11576049 35.458022 TRUE 0.84
"maize" "Chromosome 7" "S7- 13968183" 13968183 36.344763 TRUE 0.37
"maize" "Chromosome 7" "S7- 15166206" 15166206 37.231505 TRUE 0.48
"maize" "Chromosome 7" "S7- 17155493" 17155493 38.416124 TRUE 0.51
"maize" "Chromosome 7" "S7- 18437038" 18437038 38.710616 TRUE 0.34
"maize" "Chromosome 7" "S7- 20904399" 20904399 39.004947 TRUE 0.26
"maize" "Chromosome 7" "S7- 25832502" 25832502 41.390742 TRUE 0.31
"maize" "Chromosome 7" "S7- 28804978" 28804978 41.685052 TRUE 0.21
"maize" "Chromosome 7" "S7- 36635017" 36635017 41.979556 TRUE 0.02
"maize" "Chromosome 7" "S7- 45400999" 45400999 42.866342 TRUE 0.02
"maize" "Chromosome 7" "S7- 82673486" 82673486 43.160856 TRUE 0
"maize" "Chromosome 7" "S7- 92109380" 92109380 43.455458 TRUE 0.03
"maize" "Chromosome 7" "S7-107957832" 107957832 44.932174 TRUE 0.24
"maize" "Chromosome 7" "S7-108817161" 108817161 45.522245 TRUE 0.24
"maize" "Chromosome 7" "S7-112116408" 112116408 46.112412 TRUE 0.17
"maize" "Chromosome 7" "S7-115208841" 115208841 46.406921 TRUE 0.09
"maize" "Chromosome 7" "S7-118005288" 118005288 46.997088 TRUE 0.57
"maize" "Chromosome 7" "S7-118560960" 118560960 47.586949 TRUE 0.79
"maize" "Chromosome 7" "S7-121716271" 121716271 50.581525 TRUE 0.6
"maize" "Chromosome 7" "S7-123621731" 123621731 50.875729 TRUE 0.26
"maize" "Chromosome 7" "S7-124301673" 124301673 51.465912 TRUE 0.49
"maize" "Chromosome 7" "S7-124780998" 124780998 51.760416 TRUE 0.64
"maize" "Chromosome 7" "S7-126198087" 126198087 52.350578 TRUE 0.27
"maize" "Chromosome 7" "S7-126922457" 126922457 52.645077 TRUE 0.92
"maize" "Chromosome 7" "S7-127288809" 127288809 53.235239 TRUE 1.45
"maize" "Chromosome 7" "S7-127626582" 127626582 53.529743 TRUE 1.27
"maize" "Chromosome 7" "S7-127926106" 127926106 54.119925 TRUE 0.87
"maize" "Chromosome 7" "S7-128884979" 128884979 54.414467 TRUE 0.25
"maize" "Chromosome 7" "S7-130124522" 130124522 54.70897 TRUE 0.61
"maize" "Chromosome 7" "S7-130909032" 130909032 55.595757 TRUE 0.92
"maize" "Chromosome 7" "S7-131267978" 131267978 55.890196 TRUE 0.91
"maize" "Chromosome 7" "S7-132767430" 132767430 56.776955 TRUE 0.62
"maize" "Chromosome 7" "S7-134116245" 134116245 57.663762 TRUE 0.31
"maize" "Chromosome 7" "S7-135180210" 135180210 57.958291 TRUE 0.23
"maize" "Chromosome 7" "S7-137766024" 137766024 58.252711 TRUE 0.62
"maize" "Chromosome 7" "S7-138413989" 138413989 60.036382 TRUE 0.76
"maize" "Chromosome 7" "S7-139761086" 139761086 60.330568 TRUE 0.97
"maize" "Chromosome 7" "S7-141616795" 141616795 62.416067 TRUE 0.9
"maize" "Chromosome 7" "S7-142820404" 142820404 63.006172 TRUE 0.48
"maize" "Chromosome 7" "S7-143431324" 143431324 63.596506 TRUE 0.21
"maize" "Chromosome 7" "S7-146156769" 146156769 63.891104 TRUE 0.69
"maize" "Chromosome 7" "S7-146276417" 146276417 64.185701 TRUE 0.76
"maize" "Chromosome 7" "S7-147202633" 147202633 64.776035 TRUE 0.62
"maize" "Chromosome 7" "S7-147809779" 147809779 65.366348 TRUE 0.51
"maize" "Chromosome 7" "S7-148888519" 148888519 65.660823 TRUE 0.83
"maize" "Chromosome 7" "S7-150058709" 150058709 66.845945 TRUE 0.78
"maize" "Chromosome 7" "S7-150123951" 150123951 67.14042 TRUE 0.77
"maize" "Chromosome 7" "S7-151442417" 151442417 67.730712 TRUE 0.6
"maize" "Chromosome 7" "S7-152292245" 152292245 68.321019 TRUE 0.36
"maize" "Chromosome 7" "S7-153290532" 153290532 68.615554 TRUE 0.64
"maize" "Chromosome 7" "S7-153856400" 153856400 68.910164 TRUE 1.52
"maize" "Chromosome 7" "S7-153895300" 153895300 69.204741 TRUE 1.58
"maize" "Chromosome 7" "S7-154026591" 154026591 69.795049 TRUE 1.51
"maize" "Chromosome 7" "S7-154494397" 154494397 70.089616 TRUE 0.7
"maize" "Chromosome 7" "S7-155659217" 155659217 70.384183 TRUE 0.66
"maize" "Chromosome 7" "S7-156225738" 156225738 70.97426 TRUE 1.72
"maize" "Chromosome 7" "S7-156783042" 156783042 72.7573 TRUE 2.46
"maize" "Chromosome 7" "S7-157181990" 157181990 73.051699 TRUE 2.21
"maize" "Chromosome 7" "S7-157471288" 157471288 73.346218 TRUE 2.47
"maize" "Chromosome 7" "S7-157478167" 157478167 74.233063 TRUE 2.49
"maize" "Chromosome 7" "S7-157671447" 157671447 74.823155 TRUE 2.49
"maize" "Chromosome 7" "S7-158193187" 158193187 75.413263 TRUE 1.19
"maize" "Chromosome 7" "S7-159172830" 159172830 76.003334 TRUE 0.36
"maize" "Chromosome 7" "S7-160480846" 160480846 76.889769 TRUE 1.61
"maize" "Chromosome 7" "S7-161386823" 161386823 79.275222 TRUE 2.67
"maize" "Chromosome 7" "S7-162380817" 162380817 81.661111 TRUE 2.76
"maize" "Chromosome 7" "S7-162436107" 162436107 81.955237 TRUE 2.73
"maize" "Chromosome 7" "S7-163022406" 163022406 83.737289 TRUE 1.96
"maize" "Chromosome 7" "S7-163971370" 163971370 84.327051 TRUE 1.34
"maize" "Chromosome 7" "S7-164274160" 164274160 85.534133 TRUE 1.54
"maize" "Chromosome 7" "S7-166506148" 166506148 90.031184 TRUE 2.35
"maize" "Chromosome 7" "S7-167194591" 167194591 90.916981 TRUE 2.48
"maize" "Chromosome 7" "S7-168015347" 168015347 93.908624 TRUE 2.8
"maize" "Chromosome 7" "S7-168125940" 168125940 94.20284 TRUE 2.71
"maize" "Chromosome 7" "S7-168527979" 168527979 94.497208 TRUE 1.94
"maize" "Chromosome 7" "S7-169782898" 169782898 96.278631 TRUE 0.42
"maize" "Chromosome 7" "S7-170862011" 170862011 97.164621 TRUE 2.21
"maize" "Chromosome 7" "S7-171594737" 171594737 99.245529 TRUE 6.31
"maize" "Chromosome 7" "S7-171902584" 171902584 103.151052 TRUE 6.42
"maize" "Chromosome 7" "S7-172252634" 172252634 104.036887 TRUE 4.75
"maize" "Chromosome 7" "S7-172760022" 172760022 105.518898 TRUE 4.43
"maize" "Chromosome 7" "S7-172819742" 172819742 107.000984 TRUE 4.47
"maize" "Chromosome 7" "S7-172923224" 172923224 107.295386 TRUE 4.27
"maize" "Chromosome 7" "S7-172981744" 172981744 107.589938 TRUE 4.13
"maize" "Chromosome 7" "S7-173217450" 173217450 107.884301 TRUE 3.92
"maize" "Chromosome 7" "S7-173558596" 173558596 109.666081 TRUE 3.71
"maize" "Chromosome 7" "S7-173931937" 173931937 110.849519 TRUE 3.48
"maize" "Chromosome 7" "S7-175331866" 175331866 114.757183 TRUE 1.71
"maize" "Chromosome 7" "S7-176174810" 176174810 115.64318 TRUE 1.25
"maize" "Chromosome 7" "S7-176438749" 176438749 116.220752 TRUE 1.53
"maize" "Chromosome 8" "S8-   935944" 935944 0 TRUE 0.03
"maize" "Chromosome 8" "S8- 16445821" 16445821 0.2820492 TRUE 0.01
"maize" "Chromosome 8" "S8- 63069699" 63069699 1.7578806 TRUE 0.09
"maize" "Chromosome 8" "S8- 64015540" 64015540 2.0524641 TRUE 0.11
"maize" "Chromosome 8" "S8- 66719758" 66719758 2.3470155 TRUE 0.25
"maize" "Chromosome 8" "S8- 73369331" 73369331 4.7195834 TRUE 0.32
"maize" "Chromosome 8" "S8- 78370668" 78370668 5.9034624 TRUE 0.1
"maize" "Chromosome 8" "S8- 87314149" 87314149 6.4935843 TRUE 0.17
"maize" "Chromosome 8" "S8- 89037759" 89037759 6.7879154 TRUE 0.19
"maize" "Chromosome 8" "S8- 94531506" 94531506 8.5691038 TRUE 0.39
"maize" "Chromosome 8" "S8- 99103864" 99103864 10.3414282 TRUE 0.7
"maize" "Chromosome 8" "S8-106741653" 106741653 16.7554982 TRUE 0.65
"maize" "Chromosome 8" "S8-109617559" 109617559 17.8771737 TRUE 0.56
"maize" "Chromosome 8" "S8-117812515" 117812515 22.573267 TRUE 0.58
"maize" "Chromosome 8" "S8-118202047" 118202047 22.8674773 TRUE 0.58
"maize" "Chromosome 8" "S8-122573144" 122573144 25.2509975 TRUE 0.52
"maize" "Chromosome 8" "S8-124727850" 124727850 26.4345318 TRUE 0.35
"maize" "Chromosome 8" "S8-129322766" 129322766 27.024419 TRUE 0.07
"maize" "Chromosome 8" "S8-133650211" 133650211 27.6143063 TRUE 0.21
"maize" "Chromosome 8" "S8-137293372" 137293372 28.7979569 TRUE 0.53
"maize" "Chromosome 8" "S8-139631483" 139631483 30.2803511 TRUE 0.66
"maize" "Chromosome 8" "S8-140002109" 140002109 30.5746224 TRUE 0.67
"maize" "Chromosome 8" "S8-142067304" 142067304 32.0574977 TRUE 0.48
"maize" "Chromosome 8" "S8-144729450" 144729450 32.6474927 TRUE 0.55
"maize" "Chromosome 8" "S8-145375735" 145375735 33.2375846 TRUE 0.65
"maize" "Chromosome 8" "S8-146282473" 146282473 34.1243339 TRUE 0.66
"maize" "Chromosome 8" "S8-146827912" 146827912 34.4187626 TRUE 0.61
"maize" "Chromosome 8" "S8-148838135" 148838135 35.3054269 TRUE 0.43
"maize" "Chromosome 8" "S8-151667640" 151667640 36.1920541 TRUE 0.28
"maize" "Chromosome 8" "S8-152495525" 152495525 36.7821832 TRUE 0.22
"maize" "Chromosome 8" "S8-156001248" 156001248 37.0766598 TRUE 0.4
"maize" "Chromosome 8" "S8-156994385" 156994385 37.9634132 TRUE 0.66
"maize" "Chromosome 8" "S8-157225811" 157225811 37.9634133 TRUE 0.72
"maize" "Chromosome 8" "S8-157652599" 157652599 38.2579897 TRUE 0.81
"maize" "Chromosome 8" "S8-158564111" 158564111 38.8481981 TRUE 1.07
"maize" "Chromosome 8" "S8-158932382" 158932382 39.4383856 TRUE 1.17
"maize" "Chromosome 8" "S8-159037857" 159037857 39.732937 TRUE 1.2
"maize" "Chromosome 8" "S8-159252522" 159252522 40.0272179 TRUE 1.24
"maize" "Chromosome 8" "S8-161106970" 161106970 42.7160013 TRUE 1.25
"maize" "Chromosome 8" "S8-161259902" 161259902 43.010277 TRUE 1.22
"maize" "Chromosome 8" "S8-161769129" 161769129 43.3047478 TRUE 1.24
"maize" "Chromosome 8" "S8-163058941" 163058941 44.488863 TRUE 2.06
"maize" "Chromosome 8" "S8-163564267" 163564267 45.9716633 TRUE 2.66
"maize" "Chromosome 8" "S8-163687499" 163687499 46.2660586 TRUE 2.82
"maize" "Chromosome 8" "S8-163926475" 163926475 46.8561824 TRUE 3.08
"maize" "Chromosome 8" "S8-163981809" 163981809 47.7428685 TRUE 3.14
"maize" "Chromosome 8" "S8-164109765" 164109765 48.037367 TRUE 3.26
"maize" "Chromosome 8" "S8-164180533" 164180533 48.331935 TRUE 3.33
"maize" "Chromosome 8" "S8-164417768" 164417768 48.6263136 TRUE 3.51
"maize" "Chromosome 8" "S8-164827555" 164827555 50.408131 TRUE 3.7
"maize" "Chromosome 8" "S8-165101485" 165101485 51.2944433 TRUE 3.73
"maize" "Chromosome 8" "S8-165102782" 165102782 51.5887831 TRUE 3.73
"maize" "Chromosome 8" "S8-165269687" 165269687 53.0109833 TRUE 3.71
"maize" "Chromosome 8" "S8-165922542" 165922542 53.4207074 TRUE 3.46
"maize" "Chromosome 8" "S8-166264192" 166264192 56.190001 TRUE 3.2
"maize" "Chromosome 8" "S8-166347159" 166347159 57.0556145 TRUE 3.12
"maize" "Chromosome 8" "S8-166707959" 166707959 58.2388414 TRUE 2.73
"maize" "Chromosome 8" "S8-167831559" 167831559 59.4219048 TRUE 2.36
"maize" "Chromosome 8" "S8-168618145" 168618145 60.9029714 TRUE 2.93
"maize" "Chromosome 8" "S8-169187619" 169187619 62.0861673 TRUE 3.64
"maize" "Chromosome 8" "S8-169340916" 169340916 63.5679672 TRUE 3.84
"maize" "Chromosome 8" "S8-169680112" 169680112 65.3494194 TRUE 4.16
"maize" "Chromosome 8" "S8-169937031" 169937031 68.0346335 TRUE 4.28
"maize" "Chromosome 8" "S8-170315941" 170315941 68.0346336 TRUE 4.35
"maize" "Chromosome 8" "S8-170453227" 170453227 69.2180009 TRUE 4.36
"maize" "Chromosome 8" "S8-170727293" 170727293 70.4015187 TRUE 4.38
"maize" "Chromosome 8" "S8-170959760" 170959760 70.9914223 TRUE 4.38
"maize" "Chromosome 8" "S8-171091396" 171091396 71.2858851 TRUE 4.39
"maize" "Chromosome 8" "S8-171191107" 171191107 71.8758431 TRUE 4.4
"maize" "Chromosome 8" "S8-171304569" 171304569 72.4655912 TRUE 4.4
"maize" "Chromosome 8" "S8-171441623" 171441623 74.2463333 TRUE 4.4
"maize" "Chromosome 8" "S8-172312850" 172312850 77.2359006 TRUE 4.58
"maize" "Chromosome 8" "S8-172963984" 172963984 79.0172705 TRUE 5.03
"maize" "Chromosome 8" "S8-173058464" 173058464 79.3114754 TRUE 5.12
"maize" "Chromosome 8" "S8-173256448" 173256448 80.8598952 TRUE 5.27
"maize" "Chromosome 8" "S8-173380141" 173380141 81.9468789 TRUE 5.33
"maize" "Chromosome 8" "S8-173403493" 173403493 82.2409687 TRUE 5.34
"maize" "Chromosome 8" "S8-173482569" 173482569 85.2286152 TRUE 5.35
"maize" "Chromosome 8" "S8-173842867" 173842867 85.8182854 TRUE 5.35
"maize" "Chromosome 8" "S8-174160788" 174160788 86.1003426 TRUE 5.33
"maize" "Chromosome 9" "S9-  1681098" 1681098 0 TRUE 1.82
"maize" "Chromosome 9" "S9-  2472686" 2472686 1.170865 TRUE 1.83
"maize" "Chromosome 9" "S9-  7107035" 7107035 9.808914 TRUE 2.38
"maize" "Chromosome 9" "S9-  9133816" 9133816 14.948347 TRUE 2.64
"maize" "Chromosome 9" "S9- 11934301" 11934301 23.786711 TRUE 2.39
"maize" "Chromosome 9" "S9- 12625303" 12625303 24.375822 TRUE 2.21
"maize" "Chromosome 9" "S9- 12988416" 12988416 25.858314 TRUE 2.1
"maize" "Chromosome 9" "S9- 13938009" 13938009 27.042173 TRUE 1.82
"maize" "Chromosome 9" "S9- 14026400" 14026400 27.336235 TRUE 1.8
"maize" "Chromosome 9" "S9- 15981495" 15981495 30.634132 TRUE 1.31
"maize" "Chromosome 9" "S9- 17674959" 17674959 32.416638 TRUE 1.02
"maize" "Chromosome 9" "S9- 18395371" 18395371 32.711249 TRUE 0.95
"maize" "Chromosome 9" "S9- 18772291" 18772291 33.005725 TRUE 0.93
"maize" "Chromosome 9" "S9- 20338615" 20338615 34.19021 TRUE 0.89
"maize" "Chromosome 9" "S9- 20759234" 20759234 34.780247 TRUE 0.88
"maize" "Chromosome 9" "S9- 20918317" 20918317 35.667017 TRUE 0.87
"maize" "Chromosome 9" "S9- 22081626" 22081626 36.553777 TRUE 0.79
"maize" "Chromosome 9" "S9- 23021305" 23021305 36.848129 TRUE 0.71
"maize" "Chromosome 9" "S9- 25097500" 25097500 38.330869 TRUE 0.54
"maize" "Chromosome 9" "S9- 26625288" 26625288 38.920709 TRUE 0.43
"maize" "Chromosome 9" "S9- 37552401" 37552401 40.697871 TRUE 0.03
"maize" "Chromosome 9" "S9- 88819507" 88819507 40.992364 TRUE 0
"maize" "Chromosome 9" "S9-103788078" 103788078 41.878924 TRUE 0.15
"maize" "Chromosome 9" "S9-108122160" 108122160 42.468969 TRUE 0.36
"maize" "Chromosome 9" "S9-109136756" 109136756 42.763468 TRUE 0.44
"maize" "Chromosome 9" "S9-109332871" 109332871 43.353538 TRUE 0.46
"maize" "Chromosome 9" "S9-111120169" 111120169 44.537674 TRUE 0.48
"maize" "Chromosome 9" "S9-115797382" 115797382 46.016223 TRUE 0.4
"maize" "Chromosome 9" "S9-116293884" 116293884 46.310754 TRUE 0.39
"maize" "Chromosome 9" "S9-117559781" 117559781 46.900874 TRUE 0.37
"maize" "Chromosome 9" "S9-123472560" 123472560 48.67762 TRUE 0.27
"maize" "Chromosome 9" "S9-124840789" 124840789 48.972022 TRUE 0.26
"maize" "Chromosome 9" "S9-126511557" 126511557 49.266462 TRUE 0.28
"maize" "Chromosome 9" "S9-128375398" 128375398 50.450187 TRUE 0.28
"maize" "Chromosome 9" "S9-132169390" 132169390 51.633999 TRUE 0.59
"maize" "Chromosome 9" "S9-133470767" 133470767 51.928417 TRUE 0.87
"maize" "Chromosome 9" "S9-133838054" 133838054 52.518521 TRUE 0.96
"maize" "Chromosome 9" "S9-135172966" 135172966 53.108117 TRUE 1.33
"maize" "Chromosome 9" "S9-137082809" 137082809 57.3333 TRUE 1.63
"maize" "Chromosome 9" "S9-137663957" 137663957 58.51696 TRUE 1.63
"maize" "Chromosome 9" "S9-138560190" 138560190 59.701028 TRUE 1.6
"maize" "Chromosome 9" "S9-138678675" 138678675 59.995489 TRUE 1.59
"maize" "Chromosome 9" "S9-139041592" 139041592 60.290067 TRUE 1.57
"maize" "Chromosome 9" "S9-139446185" 139446185 60.584571 TRUE 1.55
"maize" "Chromosome 9" "S9-140001389" 140001389 61.471149 TRUE 1.52
"maize" "Chromosome 9" "S9-140093220" 140093220 62.655255 TRUE 1.51
"maize" "Chromosome 9" "S9-140605632" 140605632 62.94971 TRUE 1.49
"maize" "Chromosome 9" "S9-141199056" 141199056 63.244241 TRUE 1.48
"maize" "Chromosome 9" "S9-141736180" 141736180 63.834211 TRUE 1.49
"maize" "Chromosome 9" "S9-142085514" 142085514 65.316395 TRUE 1.5
"maize" "Chromosome 9" "S9-143592614" 143592614 66.798541 TRUE 1.58
"maize" "Chromosome 9" "S9-144577006" 144577006 68.274856 TRUE 1.66
"maize" "Chromosome 9" "S9-145066589" 145066589 70.357899 TRUE 1.7
"maize" "Chromosome 9" "S9-145250415" 145250415 70.652126 TRUE 1.72
"maize" "Chromosome 9" "S9-146484909" 146484909 71.835946 TRUE 1.9
"maize" "Chromosome 9" "S9-147148295" 147148295 73.617689 TRUE 2.07
"maize" "Chromosome 9" "S9-147727243" 147727243 74.207583 TRUE 2.26
"maize" "Chromosome 9" "S9-147926114" 147926114 74.797477 TRUE 2.33
"maize" "Chromosome 9" "S9-148932160" 148932160 76.579417 TRUE 2.72
"maize" "Chromosome 9" "S9-149282813" 149282813 77.76318 TRUE 2.86
"maize" "Chromosome 9" "S9-149652437" 149652437 79.845566 TRUE 2.99
"maize" "Chromosome 9" "S9-149724048" 149724048 80.435359 TRUE 3.01
"maize" "Chromosome 9" "S9-150014693" 150014693 81.024952 TRUE 3.09
"maize" "Chromosome 9" "S9-151414088" 151414088 84.62585 TRUE 3.35
"maize" "Chromosome 9" "S9-151526449" 151526449 85.511897 TRUE 3.36
"maize" "Chromosome 9" "S9-151573095" 151573095 86.398371 TRUE 3.36
"maize" "Chromosome 9" "S9-151898958" 151898958 86.692854 TRUE 3.38
"maize" "Chromosome 9" "S9-151906616" 151906616 86.987024 TRUE 3.39
"maize" "Chromosome 9" "S9-152973049" 152973049 90.281531 TRUE 3.32
"maize" "Chromosome 9" "S9-153302623" 153302623 90.871105 TRUE 3.26
"maize" "Chromosome 9" "S9-153579340" 153579340 91.932439 TRUE 3.18
"maize" "Chromosome 9" "S9-153795525" 153795525 94.441697 TRUE 3.11
"maize" "Chromosome 9" "S9-153943787" 153943787 95.031467 TRUE 3.04
"maize" "Chromosome 9" "S9-154118069" 154118069 96.51394 TRUE 2.96
"maize" "Chromosome 9" "S9-156842887" 156842887 99.776235 TRUE 2.35
